# Supplementary material for: Marine eukaryote community responses to the climate and oceanographic changes in Storfjordrenna (southern Svalbard) over the past ⁓14.0 kyr BP: Insights from sedimentary ancient DNA analysis
Source: Copernicus journal article supplement (doi:10.5194/egusphere-2025-3780), 2025-08-18
Supplement: Supplementary file 1 [file egusphere-2025-3780-supplement.zip]

## Sheet: Table S1
Table S01: Filtered sample details of the ST01 Sediment core
Sample	read counts			Age		Alpha diversity			paleo proxies (previously published data; (Łącka et al. 2019, Łącka et al. 2015, Telesiński et al. 2024)
	raw count	CSS (0.75)	CSSlog1p	Age kyr BP	time period	Hill_0D/ species richness	Hill_1D shannon	Hill_2D simpson	Sea Surface Temperature (SST UK37*)	Mean grain size <0-63> [μm]	%C37:4	Atlantic Water indicators (Nonionella labradorica %, Buccella frigida %)	Glaciomarine species (Elphidium excavatum %, Cassidulina reniforme%)	Atlantic Water indicator (Operculodium centrocarpum s.l. %)	sea-ice indicator (Echinidinium karaense %)
S006	35116	8478.03	81.6464	1.29856	Late Holocene	28	8.09988	6.27798	5.95369	21.68	14.7527	15.3361	49.1597	17.1053	1.31579
S010	4444	3992.81	95.4304	1.35681	Late Holocene	22	11.2256	7.68481	7.20999	21.57	13.0426	11.4355	61.0706	22.9508	0.327869
S024	2941	226231	69.6779	1.56067	Late Holocene	11	1.77663	1.42294	4.5816	21.57	16.5761	1.1292	41.033	21.6828	0.323625
S036	19439	4486.27	89.0712	1.735	Late Holocene	24	9.53775	6.31141	3.59387	22.17	9.77086	11.1486	58.4459	24.5033	0.662252
S040	8806	2738.18	14.9108	1.7937	Late Holocene	4	1.93173	1.86507	4.54021	22.04	14.9464	14.9171	52.2099	29.8361	0
S050	5801	4899.49	98.5644	1.93927	Late Holocene	23	6.58232	2.97282	2.40439	20.79	16.8673	11.2745	56.6176	33.3333	0
S056	12142	5469.37	144.749	2.02664	Late Holocene	42	16.4646	11.4115	7.41345	22.29	12.9612	10.951	61.3833	35.4098	0
S066	1807	2746.2	36.626	2.17226	Late Holocene	8	4.37991	3.64593	8.70964	22.62	22.0585	15.894	54.6358	39.5425	0
S076	95019	9552.53	329.876	2.31788	Late Holocene	122	25.6054	14.0363	10.1381	22.79	10.5116	22.0395	51.3158	43.9344	0
S080	85723	8291.23	290.579	2.40249	Late Holocene	101	28.3044	18.0499	9.97057	22.97	24.6578	10.1655	56.974	37.0968	0
S084	111024	11402.3	195.978	2.51348	Late Holocene	60	10.2968	5.37346	4.99462	23.61	13.1905	14.4476	55.2408	27.707	0
S096	108713	8505.83	359.101	2.84643	Late Holocene	144	30.0741	14.2254	3.96686	23.31	18.5315	16.7883	60.9489	25.4125	0
S104	52407	6125.18	277.139	3.0684	Late Holocene	91	30.6578	18.1273	7.10563	22.88	13.3874	10	63.2353	26.0726	0
S110	3503	4496.79	65.4567	3.27889	Late Holocene	16	6.00779	3.94715	7.03515	22.99	13.3718	18.0556	54.4444	28.754	0
S116	60275	11681.2	287.906	3.97358	Mid Holocene	101	11.1759	3.97058	8.0452	22.25	23.8343	9.9723	69.5291	22.508	0
S146	17857	7424.95	285.728	4.4367	Mid Holocene	97	25.9228	14.5057	8.3222	24.28	19.717	27.8656	51.7787	2.31788	0
S150	323269	287350	200.61	7.946	Mid Holocene	58	1.16051	1.04043	7.97394	23.51	6.68141	46.6495	45.3608	2.31023	0
S160	25241	8243.31	99.572	9.20949	Early Holocene	27	6.39408	3.34276	8.46035	22.64	12.4368	27.7143	53.7143	1.96721	0.983607
S164	34505	4015.01	203.665	9.2969	Early Holocene	63	29.3967	19.5024	8.99643	21.67	14.6442	31.3665	55.2795	0.331126	1.65563
S168	8070	6747.49	236.799	9.38431	Early Holocene	75	15.7757	6.14378	10.233	21.93	5.3284	39.1459	50.1779	0.655738	0
S174	8318	10746.8	315.84	9.51543	Early Holocene	104	15.3491	6.59422	9.21324	21.74	11.2178	34.3158	42.3158	0.323625	0
S186	12733	10352	201.271	9.77768	Early Holocene	54	9.27087	4.26544	4.20768	21.28	29.3704	50.7042	29.5775	1.32013	1.32013
S190	27335	4891.73	206.902	9.86509	Early Holocene	65	23.1431	12.8858	9.18839	21.68	7.98466	50	37.5	0.327869	0
S196	60732	355158	185.042	9.99621	Early Holocene	39	5.84265	4.36932	8.76444	21.37	8.27658	36.3636	45.4545	0.657895	0.657895
S206	12096	58153.8	116.763	10.2147	Early Holocene	26	3.80252	2.38778	10.7482	20.84	7.72156	28.5714	42.8571	0.955414	0.318471
S210	21495	4039.65	177.165	10.3022	Early Holocene	52	21.6442	12.2645	9.75508	21.49	11.7602	34.0249	53.9419	0.325733	0
S216	5047	19337.2	147.751	10.4333	Early Holocene	36	4.63694	2.94459	9.42388	22.24	15.0683	42.4242	45.4545	0	0
S246	67137	4855.5	248.347	11.0889	Early Holocene	88	29.0123	14.2529	7.19839	20.12	26.8764	10.5263	71.0526	0	0.325733
S255	23237	7238.94	338.057	11.3418	Early Holocene	119	29.6627	13.5998	10.7529	18.43	6.52104	100	0	0.655738	0.983607
S260	9956	4184.95	113.267	11.5448	Early Holocene	28	12.6745	8.1361
S266	18410	2630000	49.1891	11.7884	Yonger Dryas	6	1.79266	1.64407
S270	4780	2957.92	78.2266	11.9509	Yonger Dryas	19	11.245	9.21773
S276	6193	4691.67	286.886	12.1945	Yonger Dryas	94	37.1109	20.2491	1.34115	21.72	25.4797	4.16667	90.625	1.3245	4.30464
S278	20527	6918.44	344.15	12.2757	Yonger Dryas	128	20.8555	5.68598	4.11834	22.98	33.5613	1.0582	95.2381	0.651466	3.90879
S282	85504	8469.1	141.363	12.4381	Yonger Dryas	53	12.975	8.03177	4.81079	17.68	48.4252	5.12295	83.6066	0.638978	3.51438
S286	3952	4267.82	122.699	12.5644	Yonger Dryas	32	9.84933	4.32095	-1.33333	21.64	58.4973	1.51515	85.3535	1.31148	2.29508
S290	63468	5881.57	163.842	12.6691	Yonger Dryas	55	10.7825	3.93272	-1.33333	19.7	54.0146	0	66.6667	2.31788	3.31126
S302	78251	327410	196.056	12.8889	Bølling-Allerød	47	1.49225	1.15519	1.94716	18.97	63.597	0	66.6667	4.33333	7.33333
S306	10543	10235.9	158.273	12.9397	Bølling-Allerød	41	5.55197	2.4503	4.11987	18.97	13.3444	0	55.5556	1.63399	0.653595
S320	9748	13014.7	143.897	13.1174	Bølling-Allerød	40	6.95425	3.48704	5.42657	21.91	25.0427	0	50.9554	6.31229	0
S326	20634	3888.81	206.641	13.1936	Bølling-Allerød	63	27.2189	15.1145	3.54986	21.91	34.6715	4.16667	62.5	0.995025	0
S334	23302	408807	96.9742	13.2952	Bølling-Allerød	21	1.04187	1.00907	4.85999	21.91	38.5401	1.5444	70.6564	0.970874	0.323625

## Sheet: Table S2
Table S03: Eukaryote raw reads with taxonomy details of dataset
ASV_ID	S006	S010	S024	S036	S040	S050	S056	S066	S076	S080	S084	S096	S104	S110	S116	S146	S150	S160	S164	S168	S174	S186	S190	S196	S206	S210	S216	S246	S255	S260	S266	S270	S276	S278	S282	S286	S290	S302	S306	S320	S326	S334	total reads	unique asv	mean similarity	assigned/unassigned	Domain	Super group	Division
ASV1	19	15	0	6	0	0	0	0	0	0	126	0	0	0	0	0	316916	2	0	0	0	0	0	4	7526	0	0	0	0	0	0	0	0	0	22	0	0	72762	0	4956	61	23197	425612	13	1	assigned	Eukaryota	TSAR	Rhizaria
ASV10	27	91	1	1124	0	228	64	0	2090	6224	4	18124	6240	400	3166	1916	97	313	4420	758	697	663	5329	8897	10	2089	214	7778	1770	217	0	248	287	1183	1462	64	5	21	237	10	2430	4	78902	39	0.989	assigned	Eukaryota	TSAR	Stramenopiles
ASV100	0	0	0	0	0	0	0	0	484	2225	0	65	118	0	0	146	0	0	222	11	13	17	0	0	0	152	0	0	0	0	0	0	0	0	0	0	0	0	56	0	66	0	3575	12	0.981	assigned	Eukaryota	TSAR	Rhizaria
ASV101	0	0	0	0	0	0	0	0	0	0	0	0	0	0	0	0	2	0	0	0	0	0	0	0	0	0	0	0	0	0	0	0	0	0	2780	0	0	0	0	0	0	0	2782	2	0.961	assigned	Eukaryota	Obazoa	Opisthokonta
ASV1011	0	0	0	0	0	0	0	0	0	0	0	115	0	0	0	20	0	0	0	0	0	0	0	0	0	0	0	0	0	0	0	0	0	0	0	0	1	0	0	0	0	0	136	3	0.997	assigned	Eukaryota	Obazoa	Opisthokonta
ASV1028	0	0	98	0	0	0	0	0	0	0	0	8	0	0	0	0	0	0	0	0	0	0	0	0	0	0	0	0	6	0	0	0	0	0	0	0	0	0	0	0	0	0	112	3	0.928	unassigned	Eukaryota	TSAR	Alveolata
ASV1030	0	0	0	0	0	0	0	0	0	0	108	0	0	0	0	0	0	0	0	0	0	0	0	0	0	0	0	0	4	0	0	0	0	0	0	0	0	0	0	0	0	0	112	2	0.8302	unassigned	Eukaryota	TSAR	Alveolata
ASV1036	0	0	0	0	0	0	0	0	0	0	0	0	0	0	0	0	0	0	0	0	0	0	23	0	0	0	0	0	0	0	0	0	14	74	0	0	0	0	0	0	0	0	111	3	0.9587	assigned	Eukaryota	TSAR	Stramenopiles
ASV104	0	0	0	0	0	0	0	0	0	0	0	11	0	0	9	9	0	0	0	0	4	0	0	0	0	0	0	867	20	0	0	890	44	33	0	33	991	0	0	0	0	0	2911	11	0.992	assigned	Eukaryota	Obazoa	Opisthokonta
ASV105	4	1203	0	0	0	6	0	0	371	0	0	0	0	0	0	0	179	0	0	0	0	0	0	0	841	0	0	0	0	0	0	0	0	0	4	0	1	0	0	7	0	0	2616	9	1	assigned	Eukaryota	TSAR	Stramenopiles
ASV106	0	0	0	1333	0	0	0	0	104	0	859	94	0	0	0	0	0	0	2	0	0	0	0	0	4	0	0	0	2	0	0	0	0	1	0	0	0	0	0	0	190	0	2589	9	0.954	assigned	Eukaryota	TSAR	Stramenopiles
ASV107	0	0	0	0	0	0	0	0	340	93	319	2797	0	0	152	57	3	0	0	0	21	0	1	1	0	2	0	123	0	0	0	0	0	38	0	0	2	4	0	0	0	0	3953	15	0.986	assigned	Eukaryota	TSAR	Stramenopiles
ASV108	0	0	0	0	0	0	0	0	0	0	0	357	132	0	632	2	0	2	1015	42	40	0	0	0	0	323	0	0	0	0	0	0	0	1	0	0	0	2	0	0	0	0	2548	11	0.969	assigned	Eukaryota	TSAR	Stramenopiles
ASV1085	0	0	0	0	0	0	0	0	0	0	0	0	0	0	0	0	0	0	49	0	0	0	0	0	0	0	0	0	52	0	0	0	0	0	0	0	0	0	0	0	0	0	101	2	1	assigned	Eukaryota	TSAR	Alveolata
ASV109	0	0	0	0	1	0	0	0	0	538	0	605	0	0	296	0	0	0	492	5	44	0	0	0	0	328	0	0	137	0	0	0	0	7	0	0	0	0	34	0	19	0	2506	12	0.994	assigned	Eukaryota	TSAR	Stramenopiles
ASV11	0	0	0	0	0	0	616	0	107	0	39485	48	0	0	0	0	35	0	0	0	0	0	0	0	0	0	0	0	0	0	0	0	0	0	10	0	0	467	0	0	0	0	40768	7	1	assigned	Eukaryota	TSAR	Rhizaria
ASV112	0	0	0	0	0	0	0	0	10	121	0	0	0	0	0	0	0	0	0	0	0	0	0	0	0	0	2282	0	0	0	0	0	39	0	0	0	0	0	0	0	0	0	2452	4	0.9558	assigned	Eukaryota	Obazoa	Apusomonada
ASV113	0	26	0	219	0	0	184	0	470	118	667	200	507	0	174	10	8	0	52	0	10	52	0	0	0	0	0	0	15	0	0	0	15	33	0	0	0	4	0	7	0	0	2771	19	0.997	assigned	Eukaryota	TSAR	Rhizaria
ASV114	0	0	0	0	0	0	0	0	528	850	174	0	252	0	0	30	0	70	228	0	74	135	0	0	0	0	0	0	0	0	0	0	0	5	0	0	0	0	0	0	0	0	2346	10	1	assigned	Eukaryota	TSAR	Rhizaria
ASV115	2	0	0	2213	0	0	0	0	95	0	0	0	0	0	0	0	0	0	0	0	0	0	0	0	1	0	0	0	0	0	0	0	0	19	0	0	0	0	0	0	0	0	2330	5	0.9917	assigned	Eukaryota	Obazoa	Apusomonada
ASV116	0	0	0	0	0	0	0	0	641	0	0	72	0	0	413	12	0	0	1	39	0	748	42	0	0	0	24	403	0	0	0	0	10	26	0	0	0	0	0	0	0	0	2431	12	1	assigned	Eukaryota	TSAR	Rhizaria
ASV1166	0	0	0	0	0	0	0	0	0	0	0	0	0	0	52	0	0	0	0	0	8	0	0	0	0	0	0	0	1	0	0	0	0	45	0	0	0	0	0	0	0	0	106	4	1	assigned	Eukaryota	Obazoa	Opisthokonta
ASV117	0	0	0	52	0	0	0	0	0	3	0	423	200	0	0	19	189	1	0	17	18	14	453	0	0	0	11	528	0	0	0	0	8	137	0	0	1	3	110	0	128	0	2315	19	1	assigned	Eukaryota	TSAR	Rhizaria
ASV118	0	0	0	0	0	0	0	0	7	0	0	671	196	0	55	13	0	0	26	0	0	0	292	0	0	0	0	104	116	0	0	0	76	46	0	0	701	0	45	0	416	0	2764	14	0.952	assigned	Eukaryota	TSAR	Rhizaria
ASV119	0	0	0	0	0	37	2	0	0	0	0	23	0	0	8	10	0	0	0	0	0	0	0	0	0	1	0	0	0	0	0	0	0	42	0	0	1875	0	0	275	0	0	2273	9	0.979333	assigned	Eukaryota	Obazoa	Opisthokonta
ASV123	0	0	0	0	0	0	0	0	0	0	0	0	0	0	0	0	6	0	0	0	0	0	0	0	0	0	0	0	0	0	0	0	0	0	2177	0	0	0	0	0	0	0	2183	2	0.994	assigned	Eukaryota	TSAR	Alveolata
ASV125	0	0	0	0	0	0	0	0	11	0	0	998	84	0	148	109	42	0	0	10	29	0	0	0	517	0	18	0	40	0	0	0	0	81	0	0	0	0	0	0	80	0	2167	13	0.9618	assigned	Eukaryota	TSAR	Stramenopiles
ASV126	0	0	0	0	0	0	0	0	0	0	0	176	0	0	92	9	0	0	0	0	7	20	11	0	0	0	0	427	163	0	0	0	0	61	937	0	0	0	0	0	246	0	2149	11	1	assigned	Eukaryota	TSAR	Stramenopiles
ASV1266	0	0	0	0	0	0	0	0	3	0	0	22	88	0	0	0	0	0	0	0	0	0	0	0	0	0	0	0	0	0	0	0	0	0	0	0	0	0	0	0	0	0	113	3	0.8698	unassigned	Eukaryota	TSAR	Rhizaria
ASV128	0	0	0	0	0	0	0	0	8	490	0	84	0	0	2	40	0	1	0	0	6	0	0	0	0	0	3	543	89	98	0	0	29	129	1	0	1545	0	0	159	0	7	3234	17	0.989	assigned	Eukaryota	TSAR	Rhizaria
ASV129	0	0	0	0	0	25	0	0	325	809	0	1	233	0	330	2	0	0	46	0	15	0	0	0	0	0	0	0	0	0	0	0	0	0	3	0	0	306	0	0	0	2	2097	12	0.995	assigned	Eukaryota	TSAR	Rhizaria
ASV13	3535	0	0	0	0	0	865	0	295	11	1555	618	0	431	644	97	18	0	261	41	66	0	310	8772	3	0	0	372	49	612	0	0	15	403	16553	240	0	25	81	19	0	5	35896	27	1	assigned	Eukaryota	Archaeplastida	Chloroplastida
ASV131	0	0	0	0	0	0	1	0	25	0	1	0	0	0	0	0	0	0	374	0	0	0	195	0	0	0	0	0	0	0	0	0	0	25	1425	0	0	0	0	89	0	0	2135	8	0.992	assigned	Eukaryota	TSAR	Rhizaria
ASV135	0	0	0	0	0	0	0	0	236	1206	0	0	0	0	299	59	0	0	0	0	9	22	0	0	0	0	0	88	0	0	0	0	0	0	0	0	0	0	51	0	0	0	1970	8	0.984667	assigned	Eukaryota	TSAR	Rhizaria
ASV136	0	0	0	0	0	0	0	0	0	7	0	0	0	0	0	0	1958	0	0	0	0	0	0	0	0	0	0	0	0	0	0	0	0	0	0	0	0	0	0	0	0	0	1965	2	0.9754	assigned	Eukaryota	TSAR	Alveolata
ASV137	0	0	0	0	0	0	0	0	0	2	0	17	0	0	5	14	0	0	0	0	0	0	1	0	0	0	0	605	0	42	0	0	17	109	0	91	1251	0	0	0	0	0	2154	11	1	assigned	Eukaryota	Obazoa	Opisthokonta
ASV138	0	0	0	0	0	0	0	0	146	0	0	1220	284	0	0	0	0	0	0	0	14	0	0	0	0	263	11	0	0	0	0	0	0	0	0	0	0	0	0	0	0	0	1938	6	0.982667	assigned	Eukaryota	TSAR	Stramenopiles
ASV140	0	0	0	271	0	0	128	0	5	49	978	97	49	0	47	27	54	0	0	33	10	0	0	0	0	141	5	0	286	0	0	0	105	54	1	0	0	0	0	0	9	0	2349	19	1	assigned	Eukaryota	TSAR	Alveolata
ASV144	0	0	0	0	0	0	0	0	0	0	0	0	0	0	0	0	0	0	0	0	0	41	0	0	0	0	1828	0	0	0	0	0	0	0	0	0	0	0	0	0	0	0	1869	2	0.997	assigned	Eukaryota	TSAR	Rhizaria
ASV15	0	0	0	0	0	79	430	0	709	3415	70	7495	910	0	1427	320	0	1495	723	167	156	0	802	6550	0	1154	1	830	353	608	0	1	13	316	4	3	1417	10	172	590	812	0	31032	30	1	assigned	Eukaryota	TSAR	Stramenopiles
ASV150	894	0	0	0	0	0	0	0	6	0	142	270	0	0	0	0	0	0	0	0	11	11	0	0	2	275	0	0	101	0	0	0	22	7	0	0	0	1	0	0	0	0	1742	12	0.95	assigned	Eukaryota	TSAR	Rhizaria
ASV152	0	0	0	0	0	0	0	0	581	1039	0	4	0	0	0	0	0	0	0	0	5	0	0	0	0	0	0	5	43	0	0	0	0	0	0	2	0	0	8	0	24	0	1711	9	0.997	assigned	Eukaryota	TSAR	Rhizaria
ASV153	0	0	0	0	0	0	0	0	0	0	0	0	0	0	0	0	5	0	0	0	0	0	0	0	0	0	0	0	0	0	0	0	0	0	1704	0	0	0	0	0	0	0	1709	2	0.997	assigned	Eukaryota	TSAR	Alveolata
ASV155	0	0	0	0	0	0	0	0	0	0	0	19	412	0	52	6	0	0	247	11	2	0	0	0	0	0	0	0	157	0	0	0	4	16	0	0	758	0	0	0	0	1	1685	12	1	assigned	Eukaryota	TSAR	Stramenopiles
ASV156	0	0	0	775	0	0	0	0	169	33	0	0	303	0	0	0	0	0	374	0	0	0	0	0	0	0	0	0	3	0	0	0	0	6	0	0	0	0	17	0	0	0	1680	8	0.997	assigned	Eukaryota	TSAR	Rhizaria
ASV159	0	0	0	0	0	0	0	0	719	396	0	0	0	0	0	0	0	489	3	17	0	0	0	0	0	0	0	0	23	0	0	0	0	25	0	0	0	0	0	0	0	0	1672	7	0.997	assigned	Eukaryota	TSAR	Rhizaria
ASV16	0	0	0	0	5590	0	0	0	1231	2817	227	930	588	3	744	602	7	197	3165	55	310	65	1364	360	0	1538	9	3512	410	0	0	0	11	296	6	0	2	9	296	2	558	0	24904	29	1	assigned	Eukaryota	TSAR	Alveolata
ASV161	0	0	0	0	0	0	0	0	0	0	0	0	994	0	594	4	0	0	0	0	0	56	0	0	0	0	0	0	0	0	0	0	0	0	0	0	0	0	0	0	0	0	1648	4	0.995	assigned	Eukaryota	TSAR	Rhizaria
ASV162	0	0	0	0	0	0	0	0	21	10	0	519	121	0	92	45	0	0	0	38	6	28	1	0	0	212	4	0	114	0	0	0	0	20	0	0	0	2	19	0	395	0	1647	17	1	assigned	Eukaryota	TSAR	Stramenopiles
ASV163	0	0	0	0	0	0	0	0	32	0	482	163	0	0	3	0	0	0	0	0	0	0	0	0	0	0	0	0	23	0	0	0	5	15	0	0	913	0	0	0	0	0	1636	8	0.981333	assigned	Eukaryota	TSAR	Rhizaria
ASV164	0	0	0	0	0	0	0	0	712	0	0	0	0	0	0	0	0	0	0	32	0	0	0	0	0	0	0	518	72	817	0	0	15	0	0	0	0	0	0	0	0	0	2166	6	0.997	assigned	Eukaryota	TSAR	Rhizaria
ASV168	2	0	0	0	0	89	0	0	12	0	0	461	243	0	74	32	0	0	0	0	7	0	15	0	0	1	7	105	17	0	0	0	13	100	0	0	0	0	0	0	404	0	1582	16	1	assigned	Eukaryota	Obazoa	Opisthokonta
ASV175	0	0	0	0	0	0	0	368	0	0	922	0	0	0	0	0	0	0	0	1	0	0	0	0	0	149	0	0	0	0	0	0	0	23	0	0	0	0	0	0	0	0	1463	5	0.976667	assigned	Eukaryota	TSAR	Rhizaria
ASV178	0	0	0	0	0	0	0	0	0	0	0	6	0	0	1	0	0	0	0	0	0	0	0	0	0	0	0	0	0	0	0	0	0	0	0	0	1390	0	0	0	0	0	1397	3	0.94	unassigned	Eukaryota	Obazoa	Opisthokonta
ASV179	0	0	0	0	0	0	0	0	0	0	0	171	0	0	53	26	0	0	0	0	0	29	105	0	0	185	2	355	17	0	0	0	0	0	0	0	453	0	0	0	0	0	1396	10	0.901	unassigned	Eukaryota	TSAR	Stramenopiles
ASV18	3	92	0	608	0	1	339	0	591	1608	167	2729	1866	0	73	14	8	0	331	151	143	21	5	6	0	71	0	2065	1540	0	1	0	176	241	6475	34	1235	12	0	12	122	0	20740	31	1	assigned	Eukaryota	TSAR	Stramenopiles
ASV180	0	0	0	0	0	0	0	0	133	0	0	439	0	0	0	0	0	0	0	0	4	0	0	0	0	0	0	816	0	0	0	0	0	0	0	0	0	0	0	0	0	0	1392	4	0.982	assigned	Eukaryota	TSAR	Rhizaria
ASV186	1	0	0	0	0	0	0	0	5	0	0	1	150	0	29	145	0	0	375	4	28	110	402	0	0	0	0	6	0	0	0	0	10	16	0	0	40	0	16	0	0	5	1343	17	0.992	assigned	Eukaryota	TSAR	Rhizaria
ASV187	0	138	0	500	0	0	0	0	85	3	0	127	67	0	0	0	0	0	0	0	11	0	0	0	1	0	0	0	154	0	0	0	8	101	0	0	0	154	0	0	0	2	1351	13	1	assigned	Eukaryota	TSAR	Alveolata
ASV192	0	0	0	0	0	0	0	0	0	0	0	0	490	0	0	56	45	0	0	12	3	0	0	0	0	0	0	157	0	0	0	528	0	0	0	0	0	0	0	0	0	0	1291	7	1	assigned	Eukaryota	Obazoa	Opisthokonta
ASV194	0	0	0	0	0	0	0	0	566	244	0	356	96	0	0	0	59	0	0	0	0	62	0	0	0	0	0	0	0	0	0	0	0	0	0	0	0	0	0	0	0	0	1383	6	0.992	assigned	Eukaryota	TSAR	Rhizaria
ASV196	0	0	0	0	0	0	136	0	3	271	0	69	20	0	108	11	0	0	0	7	9	0	0	0	0	0	0	639	0	0	0	0	0	0	0	0	1	0	0	2	0	0	1276	12	1	assigned	Eukaryota	Archaeplastida	Chloroplastida
ASV199	0	0	0	0	0	0	0	0	393	346	256	0	0	0	0	60	0	0	130	0	0	18	0	0	0	0	0	0	0	0	0	0	0	2	0	0	0	0	13	0	0	0	1218	8	0.997	assigned	Eukaryota	TSAR	Rhizaria
ASV20	0	0	0	0	0	0	0	0	10891	7000	0	0	14	0	0	0	0	0	0	0	0	0	0	0	0	536	0	263	25	0	0	0	0	0	0	0	0	0	74	0	0	0	18803	7	1	assigned	Eukaryota	TSAR	Rhizaria
ASV202	0	0	0	0	0	0	0	0	0	1	0	2	0	0	5	37	0	0	2284	6	8	0	0	0	0	0	0	0	47	0	0	0	0	7	0	0	14	0	0	0	123	0	2534	11	0.962	assigned	Eukaryota	Obazoa	Opisthokonta
ASV204	0	0	0	0	0	0	0	0	0	0	3	1	0	0	0	0	0	0	0	0	0	0	0	0	0	0	0	0	1	0	0	0	8	0	1074	0	0	0	0	0	85	0	1172	6	1	assigned	Eukaryota	TSAR	Alveolata
ASV205	0	0	0	0	0	0	0	0	185	572	0	29	0	0	0	0	0	0	0	0	0	0	0	0	0	0	0	0	0	0	0	732	0	0	0	0	0	0	0	0	0	0	1518	4	0.995	assigned	Eukaryota	TSAR	Rhizaria
ASV21	0	0	0	0	0	0	0	0	161	234	0	5	634	0	707	723	0	107	1198	302	64	36	122	2131	2	1086	0	3530	4692	1063	0	0	59	35	0	0	0	0	88	0	9	0	16988	22	0.969	assigned	Eukaryota	TSAR	Stramenopiles
ASV212	0	0	0	0	0	0	3	0	6	5	1	6	0	0	3	1	118	0	0	0	0	0	0	0	0	160	0	194	23	0	0	0	10	0	1	0	304	4	0	262	29	0	1130	17	0.992	assigned	Eukaryota	TSAR	Stramenopiles
ASV213	0	0	0	0	0	0	0	0	0	0	0	0	0	0	5	0	0	0	0	0	0	0	0	0	0	0	0	0	0	0	0	0	0	0	0	0	1133	0	0	0	0	0	1138	2	1	assigned	Eukaryota	TSAR	Alveolata
ASV214	0	0	0	0	0	0	0	0	103	76	0	204	0	0	37	0	0	0	0	0	4	0	0	0	0	0	0	0	21	0	0	0	0	0	686	0	0	0	0	0	0	0	1131	7	0.994	assigned	Eukaryota	TSAR	Rhizaria
ASV215	0	352	0	0	0	0	5	0	0	0	896	1	0	0	0	0	0	0	0	71	2	0	0	0	0	0	0	0	0	0	0	0	101	0	0	0	288	0	0	0	0	0	1716	8	0.904	unassigned	Eukaryota	TSAR	Alveolata
ASV217	0	0	0	0	0	0	0	0	0	0	0	565	0	0	3	0	0	0	0	0	0	0	0	0	0	0	0	296	85	51	0	0	0	229	0	0	0	0	0	0	0	0	1229	6	0.997	assigned	Eukaryota	Obazoa	Opisthokonta
ASV218	0	0	0	0	0	0	0	0	0	0	0	0	0	0	0	0	2	0	0	0	0	0	0	0	0	0	0	0	0	0	0	0	5	141	977	0	0	0	0	0	0	0	1125	4	0.8736	unassigned	Eukaryota	TSAR	Alveolata
ASV22	0	0	0	0	0	0	0	0	12701	3715	0	48	0	0	0	6	0	0	0	0	2	0	0	0	0	0	0	4	0	0	0	0	0	18	0	0	0	7	0	0	0	0	16501	8	1	assigned	Eukaryota	TSAR	Alveolata
ASV220	0	0	0	0	0	0	0	0	0	0	0	8	0	0	0	0	0	0	0	0	0	0	0	0	0	0	0	0	1	0	0	0	23	0	0	0	2012	0	0	0	0	0	2044	4	0.992	assigned	Eukaryota	TSAR	Rhizaria
ASV221	0	0	0	0	0	0	0	0	141	0	0	0	0	0	0	0	0	0	0	0	0	0	0	0	0	0	0	899	0	0	0	0	0	0	0	0	0	0	0	0	0	0	1040	2	0.992	assigned	Eukaryota	TSAR	Rhizaria
ASV222	2	0	0	0	0	0	174	0	0	0	0	14	0	0	0	0	0	75	0	0	0	0	0	0	0	0	0	232	0	0	0	0	0	0	0	0	283	0	0	3	256	0	1039	8	1	assigned	Eukaryota	TSAR	Stramenopiles
ASV224	0	134	0	0	0	0	0	0	29	27	0	354	0	0	102	7	0	0	412	0	0	0	0	0	0	0	0	1	14	0	0	0	0	0	0	0	1	0	0	0	0	0	1081	10	0.997	assigned	Eukaryota	Obazoa	Opisthokonta
ASV227	0	0	0	0	0	0	0	0	2	85	0	221	0	0	291	0	15	0	0	0	12	0	0	0	1	0	0	329	30	0	0	0	0	27	0	0	0	8	0	0	0	0	1021	11	1	assigned	Eukaryota	Archaeplastida	Chloroplastida
ASV228	0	0	0	0	0	0	0	0	30	332	0	2	0	0	165	0	10	0	0	55	0	0	0	0	0	0	0	233	47	0	0	0	23	37	0	87	0	0	0	0	0	0	1021	11	0.997	assigned	Eukaryota	TSAR	Rhizaria
ASV23	0	0	0	2	0	294	0	0	1750	611	0	2757	2784	0	1282	1152	8	1032	889	87	146	25	333	4	0	393	35	1293	407	0	0	0	16	514	0	55	0	10	0	0	1000	1	16880	26	0.986	assigned	Eukaryota	TSAR	Stramenopiles
ASV230	0	0	0	0	0	0	0	0	244	0	0	43	437	0	0	0	0	0	0	0	0	0	0	0	0	0	0	270	0	0	0	0	0	0	0	0	0	0	0	0	0	0	994	4	0.992	assigned	Eukaryota	TSAR	Rhizaria
ASV232	0	0	0	0	0	0	0	0	103	0	0	345	0	0	0	98	0	0	0	0	0	0	0	0	0	0	0	413	0	0	0	0	23	0	0	0	0	0	0	0	0	0	982	5	1	assigned	Eukaryota	TSAR	Rhizaria
ASV237	0	0	0	0	0	0	0	0	1	0	2	0	4	0	0	0	42	0	0	0	10	0	0	0	0	0	0	0	796	21	0	0	160	1	0	11	0	2	0	0	0	0	1050	11	1	assigned	Eukaryota	TSAR	Alveolata
ASV240	0	0	0	0	0	0	0	0	319	386	0	191	3	0	12	0	0	0	0	0	0	0	0	1	0	0	0	0	7	0	0	0	15	12	0	0	0	0	0	0	0	0	946	9	0.992	assigned	Eukaryota	TSAR	Rhizaria
ASV241	0	0	0	0	0	129	0	0	0	0	0	679	55	0	4	0	0	0	0	0	0	0	0	0	0	0	0	0	13	0	0	0	0	44	0	0	0	0	0	0	0	0	924	6	1	assigned	Eukaryota	Obazoa	Opisthokonta
ASV243	0	0	0	0	0	0	0	0	0	0	0	799	0	0	0	0	83	0	0	0	0	0	0	0	0	0	0	0	0	0	0	0	49	0	0	0	0	0	0	0	0	0	931	3	0.901	unassigned	Eukaryota	Obazoa	Opisthokonta
ASV248	0	0	0	0	0	0	0	0	10	49	283	39	25	0	17	11	0	0	281	6	9	0	0	1	0	97	0	0	0	0	0	0	0	0	0	0	0	0	18	0	46	0	892	14	1	assigned	Eukaryota	Archaeplastida	Chloroplastida
ASV249	0	0	0	0	0	0	0	0	0	0	1	4	0	0	0	0	0	0	0	0	0	0	0	0	0	0	0	0	0	179	0	0	0	134	0	0	795	0	0	0	0	0	1113	5	0.8512	unassigned	Eukaryota	TSAR	Alveolata
ASV25	0	0	0	0	0	0	0	0	5313	9850	0	157	0	0	0	0	0	0	3	0	14	0	0	0	0	0	0	3	0	0	0	0	0	0	0	0	0	2	0	0	0	0	15342	7	0.982333	assigned	Eukaryota	TSAR	Rhizaria
ASV250	0	0	2	0	0	0	0	0	6	0	0	607	23	0	22	69	0	0	0	18	12	0	4	1	0	0	0	0	81	0	0	0	150	65	0	0	0	0	0	0	50	0	1110	14	1	assigned	Eukaryota	Obazoa	Opisthokonta
ASV251	0	0	0	0	0	0	0	0	0	177	0	0	0	0	0	0	0	470	0	0	0	45	196	0	0	0	0	0	0	0	0	0	0	0	0	0	0	0	0	0	0	0	888	4	0.920667	unassigned	Eukaryota	Provora	Nibbleridia
ASV252	0	0	0	0	0	0	0	0	0	0	0	3	0	0	0	0	0	0	0	0	0	0	0	0	0	0	0	0	0	0	0	0	0	0	0	0	885	0	0	0	0	0	888	2	0.953	assigned	Eukaryota	TSAR	Stramenopiles
ASV255	0	0	0	0	0	0	0	0	0	0	0	7	0	0	0	45	0	0	0	0	0	0	0	0	0	0	0	0	0	0	0	0	0	0	0	0	831	0	0	0	0	0	883	3	1	assigned	Eukaryota	TSAR	Telonemia
ASV257	0	0	0	0	0	0	0	0	0	0	0	0	470	0	0	82	0	0	20	1	40	0	0	0	0	157	0	1	28	0	0	76	0	0	0	0	0	0	0	0	0	0	875	9	0.980333	assigned	Eukaryota	TSAR	Rhizaria
ASV259	0	0	0	0	0	0	0	0	0	81	271	173	0	87	0	1	0	0	0	0	1	0	0	0	0	0	21	30	0	201	0	0	76	0	0	0	0	0	0	0	0	0	942	10	0.9014	unassigned	Eukaryota	TSAR	Rhizaria
ASV26	4	0	0	6313	0	0	384	0	3288	7518	1614	5278	3304	299	1364	447	66	7	1183	183	141	137	0	3	2	81	66	2194	512	0	0	0	228	946	0	307	1336	4	17	514	455	0	38195	31	0.965	assigned	Eukaryota	TSAR	Stramenopiles
ASV260	0	0	0	0	0	0	0	0	0	0	846	0	0	0	0	0	0	0	0	0	0	0	0	0	0	0	0	0	5	0	0	0	10	0	0	0	0	0	0	0	0	0	861	3	1	assigned	Eukaryota	TSAR	Rhizaria
ASV265	0	0	0	0	0	0	0	0	84	4	0	0	0	0	0	0	0	0	6	0	0	0	0	749	0	0	0	0	0	0	0	0	0	0	0	0	0	0	0	0	0	0	843	4	0.994	assigned	Eukaryota	TSAR	Alveolata
ASV268	0	0	1	0	0	0	0	0	0	0	0	468	0	0	0	0	0	0	0	0	0	0	0	0	0	0	0	0	82	0	0	0	69	25	0	0	243	0	0	0	0	0	888	6	1	assigned	Eukaryota	Obazoa	Opisthokonta
ASV27	0	511	399	0	0	0	1230	2	1972	2347	16011	0	31	0	0	137	0	0	0	0	107	232	179	0	0	119	0	615	633	0	0	0	153	115	3	0	0	0	8	8	246	7	25065	22	0.997	assigned	Eukaryota	TSAR	Rhizaria
ASV270	0	0	0	0	0	0	0	0	0	0	0	275	300	0	18	92	0	0	0	29	8	0	0	0	0	0	0	0	29	0	0	0	0	74	0	0	0	0	0	0	0	0	825	8	0.8598	unassigned	Eukaryota	TSAR	Rhizaria
ASV271	0	0	0	0	0	0	0	0	702	0	0	0	63	0	0	0	0	0	0	0	0	9	0	0	0	0	0	0	0	0	0	0	6	30	0	12	0	0	0	0	187	0	1009	7	1	assigned	Eukaryota	TSAR	Alveolata
ASV278	0	0	0	0	0	0	0	0	0	2	0	0	41	0	17	512	0	0	517	0	0	0	0	0	0	0	0	0	0	0	0	0	0	0	0	0	0	0	0	0	0	0	1089	5	0.997	assigned	Eukaryota	Obazoa	Opisthokonta
ASV279	0	0	0	0	0	0	0	0	0	149	0	0	0	0	88	13	0	0	0	0	21	40	0	0	0	390	10	0	0	0	0	0	0	49	0	0	0	0	0	0	104	0	864	9	0.8957	unassigned	Eukaryota	TSAR	Rhizaria
ASV28	0	7	0	0	1	67	993	395	130	237	3997	1140	209	178	545	250	156	0	307	3	77	0	1789	0	0	0	40	1995	225	0	0	0	8	299	13	115	0	4	20	11	529	0	13740	29	1	assigned	Eukaryota	TSAR	Stramenopiles
ASV281	0	0	0	0	0	0	0	0	341	91	0	0	0	0	0	0	0	0	0	0	0	0	0	0	0	0	0	0	0	0	0	0	0	0	369	0	0	0	0	0	0	0	801	3	1	assigned	Eukaryota	TSAR	Alveolata
ASV282	0	0	0	0	0	0	0	0	145	51	363	29	0	0	0	0	0	0	0	0	0	0	0	3	0	0	0	41	0	0	0	0	0	5	0	0	1	0	0	0	161	0	799	9	1	assigned	Eukaryota	TSAR	Alveolata
ASV283	0	0	0	0	0	0	0	0	6	0	0	808	0	0	16	20	0	0	0	0	0	0	0	0	0	0	0	0	0	0	0	0	0	13	0	0	0	0	0	0	0	0	863	5	1	assigned	Eukaryota	TSAR	Alveolata
ASV285	0	0	0	0	0	56	0	47	0	0	0	469	41	0	97	24	0	0	0	39	0	0	0	0	0	0	0	0	0	0	0	0	0	8	0	0	0	0	0	0	0	0	781	8	1	assigned	Eukaryota	Archaeplastida	Chloroplastida
ASV288	0	0	0	0	0	0	0	0	4	85	0	0	9	0	4	9	0	120	390	39	9	23	35	7	0	56	0	1	0	0	0	0	0	19	0	0	0	0	4	0	19	0	833	17	0.9541	assigned	Eukaryota	TSAR	Rhizaria
ASV289	0	0	0	0	0	0	0	0	44	0	480	0	0	0	27	22	0	0	0	10	15	26	0	0	0	0	0	109	5	0	0	0	0	0	0	0	0	0	24	0	0	0	762	10	1	assigned	Eukaryota	TSAR	Rhizaria
ASV29	2	0	0	1	0	129	34	0	258	1516	3	1547	1806	7	399	538	123	2295	1515	351	7	187	1150	31	6	644	6	1802	468	1120	0	0	693	362	587	201	3100	799	247	274	434	10	22652	36	0.949	assigned	Eukaryota	TSAR	Alveolata
ASV292	0	0	0	0	0	0	0	0	0	0	0	185	139	0	0	0	0	0	0	0	0	0	0	2	0	0	0	0	0	0	0	0	0	0	0	0	0	4	0	0	976	0	1306	5	0.992	assigned	Eukaryota	Obazoa	Opisthokonta
ASV297	1	0	0	278	0	0	3	0	0	25	0	733	27	0	0	0	0	0	0	0	3	0	0	0	0	0	0	0	0	0	0	0	0	0	0	0	0	3	0	0	0	0	1073	8	1	assigned	Eukaryota	TSAR	Alveolata
ASV298	0	126	0	0	0	0	0	0	0	0	0	21	63	0	0	0	0	0	0	0	0	14	147	0	0	0	0	213	20	52	0	0	0	0	0	0	0	0	0	2	70	0	728	10	1	assigned	Eukaryota	TSAR	Alveolata
ASV299	0	61	0	0	0	0	3	72	25	0	0	168	0	0	113	0	0	0	0	0	0	0	0	0	0	0	0	0	15	0	0	0	0	139	0	0	1	0	0	197	0	0	794	10	0.951	assigned	Eukaryota	TSAR	Stramenopiles
ASV3	57	36	0	11	0	3295	8	168	4932	4904	3180	15399	6192	27	5544	2044	1410	890	2469	474	958	1982	3287	24476	1733	4495	144	13461	2480	2746	13492	27	852	8323	21548	1819	31274	2194	116	1224	3745	0	191416	39	0.988667	assigned	Eukaryota	TSAR	Stramenopiles
ASV308	0	0	0	0	0	0	0	0	40	408	0	0	0	0	0	0	0	0	0	5	0	0	0	0	0	0	0	169	0	0	0	0	0	42	0	0	0	0	0	0	0	0	664	5	0.997	assigned	Eukaryota	TSAR	Rhizaria
ASV311	0	0	0	0	0	0	0	0	19	0	0	0	0	0	0	0	0	0	0	0	3	0	0	0	0	0	0	0	0	0	0	640	0	0	0	0	0	0	0	0	0	0	662	3	0.912333	unassigned	Eukaryota	TSAR	Rhizaria
ASV313	0	0	0	0	0	0	0	0	0	62	0	0	75	0	124	8	222	0	91	0	8	0	153	0	0	0	7	0	0	0	0	0	0	19	0	0	0	0	0	0	0	3	772	11	0.995	assigned	Eukaryota	TSAR	Rhizaria
ASV319	0	0	0	0	0	0	0	0	24	0	0	0	289	0	0	0	0	0	0	0	5	0	385	1	0	0	0	0	28	0	0	0	0	30	0	0	0	0	38	0	0	0	800	8	0.908	unassigned	Eukaryota	TSAR	Rhizaria
ASV32	10678	0	0	1281	0	0	0	0	67	277	291	368	702	0	300	69	0	0	0	0	22	70	0	4	13	123	0	174	7	0	0	0	0	66	0	0	0	8	0	0	197	0	14717	19	0.994	assigned	Eukaryota	TSAR	Stramenopiles
ASV320	0	0	0	0	0	0	0	0	0	0	326	84	37	0	63	0	8	133	0	0	0	21	0	0	0	0	2	0	0	0	0	0	0	0	1	0	0	0	0	0	64	0	739	10	0.997	assigned	Eukaryota	TSAR	Alveolata
ASV321	0	0	0	0	0	0	0	0	0	0	0	0	0	0	5	0	0	0	0	0	5	0	152	0	0	0	18	369	0	0	0	0	7	90	0	0	0	0	0	0	0	0	646	7	0.954667	assigned	Eukaryota	TSAR	Stramenopiles
ASV322	0	0	0	0	0	0	0	0	0	72	0	0	0	0	0	0	0	0	0	0	0	0	0	0	0	0	0	518	53	0	0	0	0	0	2	0	0	0	0	0	0	0	645	4	0.8865	unassigned	Eukaryota	TSAR	Alveolata
ASV326	0	0	0	0	0	0	126	0	157	31	233	0	0	0	7	0	0	0	0	0	0	0	68	0	0	0	0	0	0	0	0	0	6	0	0	0	0	0	0	0	0	0	628	7	0.985333	assigned	Eukaryota	TSAR	Alveolata
ASV342	0	0	0	0	0	0	0	0	0	0	0	0	0	0	0	0	0	0	0	13	2	0	0	0	0	0	0	480	0	0	0	0	28	20	1	47	0	0	0	0	0	0	591	7	1	assigned	Eukaryota	TSAR	Alveolata
ASV346	0	0	0	0	0	0	0	0	0	0	0	0	0	0	0	0	0	0	0	0	0	0	0	0	573	0	0	0	8	0	0	0	0	0	0	0	0	0	0	0	0	0	581	2	0.9711	assigned	Eukaryota	TSAR	Stramenopiles
ASV350	0	0	0	0	0	0	0	0	99	0	258	0	0	0	0	0	0	0	195	0	6	0	0	0	0	0	0	0	9	0	0	0	0	3	0	0	0	0	0	0	0	0	570	6	1	assigned	Eukaryota	TSAR	Rhizaria
ASV354	0	0	0	0	0	0	0	0	0	0	0	0	0	0	0	0	20	0	0	0	3	0	0	0	539	0	0	0	0	0	0	0	0	0	0	0	0	1	0	0	0	0	563	4	0.904	unassigned	Eukaryota	Obazoa	Opisthokonta
ASV359	0	0	0	0	0	0	0	0	453	0	0	33	0	0	39	0	0	0	0	0	0	0	0	0	0	0	0	0	11	0	0	0	0	13	0	0	0	0	0	0	0	0	549	5	1	assigned	Eukaryota	TSAR	Rhizaria
ASV36	1894	126	0	0	0	298	76	0	114	511	298	1070	2251	61	347	110	104	0	38	49	26	46	199	0	2	202	5	51	746	126	0	139	71	323	7	72	333	56	25	6	28	0	9810	34	1	assigned	Eukaryota	TSAR	Stramenopiles
ASV367	0	0	0	0	0	0	0	0	0	98	0	0	0	0	0	3	0	0	0	0	0	0	0	0	0	0	0	0	23	0	0	0	0	0	406	0	0	0	0	0	0	0	530	4	1	assigned	Eukaryota	TSAR	Rhizaria
ASV368	0	0	0	0	0	0	0	0	0	0	0	0	0	0	0	3	0	0	0	0	0	0	0	0	0	142	0	0	0	0	0	374	7	0	0	0	0	0	0	0	0	0	526	4	0.995	assigned	Eukaryota	Obazoa	Opisthokonta
ASV37	0	0	2	146	0	0	0	0	202	72	539	1272	2260	0	111	357	32	3	62	55	34	57	435	5	0	683	19	613	239	141	0	2	272	649	1053	9	73	239	72	133	571	0	10412	32	1	assigned	Eukaryota	TSAR	Stramenopiles
ASV371	0	0	0	0	0	0	106	0	330	74	0	0	0	0	0	0	0	0	0	0	0	0	0	0	0	1	0	0	0	0	0	0	0	0	0	0	0	0	0	0	0	0	511	4	0.995	assigned	Eukaryota	TSAR	Rhizaria
ASV374	0	0	0	0	0	92	0	0	0	0	0	0	0	0	278	81	0	0	0	0	5	0	54	0	0	0	0	1	0	0	0	0	0	0	0	0	0	0	0	0	0	0	511	6	1	assigned	Eukaryota	Obazoa	Opisthokonta
ASV377	0	0	0	0	0	0	0	0	62	0	0	24	0	0	0	102	11	0	0	0	5	0	233	0	0	0	0	0	73	0	0	0	0	0	0	0	0	0	0	0	0	0	510	7	0.995	assigned	Eukaryota	TSAR	Rhizaria
ASV38	3321	0	0	0	0	0	0	0	64	0	165	1327	134	2	135	359	2	0	1004	137	22	27	0	9	0	0	0	349	1572	400	0	0	12	0	1	0	0	0	36	0	0	0	9078	20	0.966	assigned	Eukaryota	TSAR	Stramenopiles
ASV387	0	0	0	0	0	268	0	0	243	48	0	0	0	0	0	0	0	0	0	0	0	0	0	0	0	0	0	4	0	0	0	0	0	0	0	0	0	0	0	0	0	0	563	4	0.994	assigned	Eukaryota	TSAR	Rhizaria
ASV391	0	0	0	0	0	0	0	0	0	0	0	18	0	0	0	0	0	0	0	0	0	24	0	0	0	0	0	0	0	0	0	0	0	30	437	0	0	0	0	0	0	0	509	4	1	assigned	Eukaryota	TSAR	Alveolata
ASV392	0	0	0	0	0	0	475	0	0	0	0	0	0	0	0	0	0	0	133	0	0	0	0	0	0	0	0	0	0	0	0	0	0	35	0	0	0	0	0	2	0	0	645	4	1	assigned	Eukaryota	TSAR	Alveolata
ASV399	0	0	0	0	0	0	4	0	30	0	0	83	0	0	0	0	0	0	0	0	0	0	0	32	0	0	0	0	0	0	0	0	0	48	0	0	0	0	0	299	0	0	496	6	1	assigned	Eukaryota	Obazoa	Opisthokonta
ASV40	0	0	0	0	0	0	0	0	1052	2090	0	4091	1210	0	255	270	0	0	384	53	66	0	0	0	0	384	0	5	96	0	0	0	0	0	0	0	0	3	0	0	404	0	10363	14	0.964	assigned	Eukaryota	TSAR	Stramenopiles
ASV403	0	0	0	0	0	0	3	0	16	8	0	3	0	8	3	0	0	0	0	46	6	0	0	14	0	0	0	0	32	6	0	0	0	0	0	0	315	11	0	0	0	0	471	13	0.959333	assigned	Eukaryota	TSAR	Stramenopiles
ASV405	0	0	0	0	0	0	0	0	0	0	0	307	76	0	0	0	0	0	0	0	0	0	0	1	0	0	0	0	0	0	0	0	0	0	0	88	0	0	0	0	0	0	472	4	1	assigned	Eukaryota	Obazoa	Opisthokonta
ASV407	0	0	0	0	0	0	0	0	401	0	0	0	0	0	0	0	0	0	0	0	0	0	0	0	0	0	0	0	0	0	0	0	70	0	0	0	0	0	0	0	0	0	471	2	0.969	assigned	Eukaryota	TSAR	Rhizaria
ASV41	1626	39	0	0	0	0	454	0	147	210	5676	0	66	0	0	0	0	0	0	7	0	0	0	2	0	0	0	0	0	0	0	0	0	0	0	0	0	6	0	8	0	0	8241	11	1	assigned	Eukaryota	TSAR	Rhizaria
ASV415	0	0	0	0	0	0	0	1	0	2	0	0	0	0	0	0	0	0	0	0	1	0	0	0	0	0	0	0	0	0	0	249	0	5	0	0	0	203	0	0	0	0	461	6	0.997	assigned	Eukaryota	TSAR	Alveolata
ASV424	0	257	0	0	0	0	0	0	0	0	0	149	14	0	0	15	10	0	0	0	0	0	0	0	0	0	0	0	0	0	0	0	0	0	0	0	0	0	0	3	0	0	448	6	0.962667	assigned	Eukaryota	TSAR	Alveolata
ASV43	2	0	2431	2842	0	0	0	0	210	128	2239	707	49	0	98	0	46	0	0	0	4	0	29	1	0	0	5	434	44	0	0	0	259	84	13	0	0	0	53	0	182	0	9860	21	0.953	assigned	Eukaryota	TSAR	Rhizaria
ASV431	0	0	0	0	0	0	0	0	0	0	0	72	0	0	0	0	0	0	53	0	0	0	0	0	0	0	15	0	0	0	0	0	0	37	0	0	126	0	0	0	136	0	439	6	0.9554	assigned	Eukaryota	TSAR	Stramenopiles
ASV432	0	0	0	0	0	0	0	0	0	0	0	270	0	0	0	0	75	0	0	0	0	0	0	0	0	0	0	0	32	0	0	0	0	0	0	84	0	0	0	0	0	0	461	4	1	assigned	Eukaryota	Obazoa	Opisthokonta
ASV447	0	0	0	0	0	234	0	0	0	0	0	0	0	0	0	0	0	0	158	0	0	0	0	0	0	0	0	0	12	0	0	0	4	0	0	0	0	0	0	0	0	0	408	4	0.954	assigned	Eukaryota	TSAR	Stramenopiles
ASV45	1365	0	0	0	0	0	155	0	518	703	2396	56	0	0	44	1809	0	0	0	0	70	58	521	4	0	0	0	468	0	0	0	0	16	0	3	0	0	7	230	0	350	9	8782	19	1	assigned	Eukaryota	TSAR	Rhizaria
ASV451	0	0	0	0	0	0	0	0	278	17	0	0	0	0	0	63	0	0	0	0	0	0	0	0	0	0	0	0	37	0	0	0	0	7	0	0	0	0	0	0	0	3	405	6	0.986	assigned	Eukaryota	TSAR	Rhizaria
ASV46	0	0	0	0	0	0	2	0	890	38	0	0	0	0	18	3	0	0	0	3006	2707	0	0	0	0	0	0	7	12	0	0	4	0	0	0	134	0	0	0	0	0	0	6821	11	0.995	assigned	Eukaryota	TSAR	Rhizaria
ASV463	0	0	0	0	0	0	0	0	0	0	27	364	0	0	0	3	0	0	0	0	0	0	0	0	0	0	0	0	0	0	0	0	0	0	0	0	0	0	0	0	0	0	394	3	0.953	assigned	Eukaryota	TSAR	Stramenopiles
ASV464	0	0	0	0	0	15	0	0	0	0	0	0	17	0	0	23	0	0	0	0	0	0	0	0	0	72	0	492	0	0	0	0	0	0	0	0	15	0	0	0	8	0	642	7	1	assigned	Eukaryota	TSAR	Alveolata
ASV465	0	0	0	0	0	0	0	0	0	0	0	0	0	0	0	0	3	0	0	0	0	0	0	0	0	0	0	0	94	20	0	0	79	77	0	115	0	0	7	0	0	0	395	7	1	assigned	Eukaryota	TSAR	Alveolata
ASV468	0	0	0	0	0	0	0	0	0	0	0	0	0	0	122	0	0	0	0	2	0	0	440	0	0	0	0	0	0	0	0	0	16	15	0	0	0	0	0	0	0	0	595	5	1	assigned	Eukaryota	Obazoa	Opisthokonta
ASV47	0	0	0	0	0	0	0	0	437	0	0	0	149	0	2784	0	0	1535	122	114	0	1043	41	0	0	0	19	0	0	0	0	0	0	0	0	0	0	0	431	0	0	0	6675	10	0.967	assigned	Eukaryota	TSAR	Rhizaria
ASV472	0	0	0	0	0	0	0	0	0	0	0	0	46	0	210	32	0	0	0	2	0	0	0	0	0	30	0	1	0	0	0	0	0	1	2	0	0	0	0	0	62	0	386	9	0.996	assigned	Eukaryota	TSAR	Alveolata
ASV476	0	0	0	0	0	0	0	0	0	0	0	293	0	0	0	0	90	0	0	0	0	0	0	0	0	0	0	0	0	0	0	0	0	0	0	0	0	0	0	0	0	0	383	2	0.9558	assigned	Eukaryota	Obazoa	Apusomonada
ASV48	0	0	0	0	0	103	0	0	470	313	61	503	310	0	148	29	0	0	153	7	32	139	1168	3	0	44	0	1581	264	133	4	218	66	277	0	17	403	44	0	0	75	0	6565	26	1	assigned	Eukaryota	TSAR	Stramenopiles
ASV481	106	0	0	0	0	0	0	0	0	0	7	0	0	0	0	0	0	0	262	0	2	0	0	0	0	0	0	0	0	0	0	0	0	0	0	0	0	0	0	0	0	0	377	4	1	assigned	Eukaryota	TSAR	Rhizaria
ASV482	0	0	0	0	0	95	0	0	36	0	56	0	0	0	96	0	0	0	0	0	19	0	74	0	0	0	0	0	0	0	0	0	0	0	0	0	0	0	0	0	0	0	376	6	0.997	assigned	Eukaryota	TSAR	Stramenopiles
ASV484	0	0	0	0	0	0	0	0	0	0	0	0	0	0	0	0	299	0	0	0	0	0	0	0	0	0	0	0	73	0	0	0	0	0	0	0	0	2	0	0	0	0	374	3	1	assigned	Eukaryota	Obazoa	Opisthokonta
ASV497	0	0	0	0	0	0	0	0	0	0	0	0	0	0	0	0	0	0	0	0	6	0	0	0	0	0	0	0	11	0	0	0	0	0	344	0	0	0	0	0	0	0	361	3	0.9062	unassigned	Eukaryota	Obazoa	Opisthokonta
ASV499	0	0	0	0	0	0	0	0	15	0	0	0	0	0	0	0	0	0	306	0	0	0	0	0	0	0	0	0	24	0	0	0	0	15	0	0	0	0	0	0	0	0	360	4	0.901	unassigned	Eukaryota	TSAR	Rhizaria
ASV50	5665	0	0	0	0	0	0	0	0	0	0	0	254	0	0	0	0	0	0	0	0	0	0	0	0	0	0	0	27	0	0	0	0	0	0	0	0	0	0	0	317	0	6263	4	1	assigned	Eukaryota	TSAR	Stramenopiles
ASV500	0	0	0	0	0	0	0	0	0	0	0	0	100	0	0	0	0	0	0	0	0	0	0	0	0	0	0	0	0	0	0	0	20	0	0	56	33	149	0	0	0	0	358	5	1	assigned	Eukaryota	Obazoa	Opisthokonta
ASV504	0	0	0	0	0	0	0	0	10	79	0	0	0	0	0	35	0	0	0	0	0	19	111	0	0	82	0	0	0	0	0	0	0	0	0	0	0	0	20	0	0	0	356	7	0.992	assigned	Eukaryota	Haptista	Haptophyta
ASV51	1	0	0	0	0	0	0	0	157	97	1200	1533	201	0	823	130	0	0	31	40	65	0	69	0	2	395	5	678	268	3	1	0	0	149	4	95	595	0	0	0	0	0	6542	23	1	assigned	Eukaryota	TSAR	Stramenopiles
ASV515	0	0	0	0	0	0	0	0	0	0	157	0	0	0	0	0	0	0	0	0	0	0	0	0	0	0	0	0	14	0	0	0	12	0	0	0	0	0	0	0	151	0	334	4	1	assigned	Eukaryota	Obazoa	Opisthokonta
ASV517	0	0	0	0	0	0	0	0	300	3	0	0	0	0	0	0	0	0	0	0	0	0	0	3	0	0	0	0	0	0	0	0	36	0	0	0	0	0	0	0	0	0	342	4	0.997	assigned	Eukaryota	TSAR	Alveolata
ASV526	0	0	0	0	0	0	0	0	0	0	0	0	0	0	0	0	0	0	0	0	0	0	267	0	0	0	0	0	0	0	0	0	0	57	0	0	0	0	0	0	0	0	324	2	1	assigned	Eukaryota	Obazoa	Opisthokonta
ASV53	0	0	0	0	0	0	0	0	0	0	0	0	0	0	0	0	0	0	0	0	0	0	0	0	0	0	0	0	0	0	0	0	7	0	5793	0	0	0	0	0	0	0	5800	2	0.911	unassigned	Eukaryota	TSAR	Rhizaria
ASV534	0	0	0	0	0	0	0	0	0	396	0	0	0	0	0	0	2	0	0	0	0	0	0	0	0	0	0	0	0	0	0	0	0	11	0	0	0	0	0	0	0	0	409	3	1	assigned	Eukaryota	TSAR	Alveolata
ASV538	0	0	0	0	0	0	0	0	0	0	97	0	0	0	0	0	0	0	0	0	0	0	0	0	0	0	0	0	26	192	0	0	0	0	0	0	0	0	0	0	0	0	315	3	0.978	assigned	Eukaryota	TSAR	Stramenopiles
ASV54	0	0	0	0	0	0	2096	0	0	9	188	102	0	0	49	3	0	0	0	14	6	23	147	0	0	0	0	32	261	246	0	0	95	346	2031	26	212	0	0	19	0	7	5912	20	1	assigned	Eukaryota	TSAR	Rhizaria
ASV540	0	0	0	0	0	0	0	0	0	237	70	0	0	0	0	0	0	0	0	0	2	0	0	0	0	0	0	0	5	0	0	0	0	0	0	0	0	0	0	0	0	0	314	4	1	assigned	Eukaryota	Archaeplastida	Chloroplastida
ASV543	0	0	0	0	0	0	0	0	33	0	0	66	0	135	0	0	0	0	0	0	0	0	0	0	0	0	0	0	0	0	0	0	0	0	0	0	0	0	13	0	63	0	310	5	1	assigned	Eukaryota	TSAR	Rhizaria
ASV547	0	0	0	0	0	0	0	0	1	143	0	0	40	0	0	0	0	0	162	0	0	0	0	0	0	0	0	0	0	0	0	0	0	0	0	0	0	0	0	0	0	0	346	4	1	assigned	Eukaryota	TSAR	Alveolata
ASV55	0	0	0	0	0	0	0	0	0	0	0	0	0	0	0	0	0	0	0	0	0	0	0	5695	0	0	15	0	0	0	0	0	0	0	0	0	0	0	0	0	0	0	5710	2	0.988	assigned	Eukaryota	Archaeplastida	Chloroplastida
ASV553	0	0	0	0	0	0	0	0	0	46	0	0	256	0	0	1	0	0	0	0	0	0	0	0	0	0	0	0	0	0	0	0	0	0	0	0	0	0	0	0	0	0	303	3	0.997	assigned	Eukaryota	TSAR	Rhizaria
ASV555	0	0	0	0	0	0	0	0	0	0	0	0	22	0	0	0	0	0	0	0	58	75	147	0	0	0	0	0	0	0	0	0	0	0	1	0	0	0	0	0	0	0	303	5	0.9222	unassigned	Eukaryota	TSAR	Rhizaria
ASV563	0	0	0	0	0	0	94	0	0	0	0	0	0	0	0	0	0	0	0	30	0	0	0	0	0	152	0	0	0	0	0	0	0	14	0	0	0	0	0	2	0	0	292	5	1	assigned	Eukaryota	TSAR	Rhizaria
ASV564	0	0	0	0	0	0	0	0	0	0	0	128	0	0	0	0	0	0	0	0	0	0	88	0	0	0	0	0	50	0	0	0	11	15	0	0	0	0	0	0	0	0	292	5	0.988	assigned	Eukaryota	Obazoa	Opisthokonta
ASV565	0	0	0	0	0	0	0	0	0	0	0	114	0	0	115	0	0	0	0	0	0	0	0	0	110	0	0	0	0	0	0	0	0	0	0	0	1	0	0	0	0	0	340	4	1	assigned	Eukaryota	TSAR	Alveolata
ASV569	0	0	0	0	0	0	0	0	0	0	0	0	0	0	85	0	0	0	0	0	0	0	0	0	0	201	0	1	0	0	0	0	0	0	0	0	0	0	0	0	0	0	287	3	0.994	assigned	Eukaryota	Obazoa	Opisthokonta
ASV57	1	0	2	0	0	0	502	0	0	54	1	297	411	0	11	19	1	0	935	15	16	0	362	2	0	82	0	136	217	146	0	0	152	126	1837	0	888	28	0	11	302	0	6554	26	1	assigned	Eukaryota	Obazoa	Opisthokonta
ASV575	0	0	0	0	0	0	101	0	0	0	0	0	0	0	0	0	0	0	0	0	5	0	0	0	0	0	0	0	70	0	0	22	0	0	0	0	0	0	0	0	82	0	280	5	0.914	unassigned	Eukaryota	TSAR	Rhizaria
ASV579	0	0	0	0	0	0	0	0	0	0	0	88	0	0	0	0	0	0	0	0	0	0	0	0	0	0	0	201	191	0	0	0	38	29	0	0	0	0	0	1	0	0	548	6	1	assigned	Eukaryota	TSAR	Alveolata
ASV58	0	0	1	0	0	0	0	0	111	0	0	2219	811	0	303	258	0	0	365	100	37	120	194	0	0	427	0	1063	175	0	0	0	117	1	0	0	165	0	17	0	761	0	7245	19	1	assigned	Eukaryota	Haptista	Haptophyta
ASV590	0	0	0	0	0	0	0	0	50	131	0	0	0	0	0	0	0	0	0	2	0	0	0	0	0	94	0	0	0	0	0	0	0	0	0	0	0	0	0	0	0	0	277	4	0.994	assigned	Eukaryota	TSAR	Alveolata
ASV592	0	659	0	0	0	0	4	0	0	0	0	0	0	0	0	0	0	0	0	0	0	0	0	0	0	0	0	0	0	0	0	0	0	12	0	0	0	0	0	0	0	0	675	3	0.8231	unassigned	Eukaryota	TSAR	Alveolata
ASV594	0	0	0	0	0	0	0	0	0	0	0	0	0	0	0	0	15	0	0	0	0	0	1	0	0	0	0	0	277	0	0	0	0	9	0	0	0	0	0	0	0	1	303	5	0.918	unassigned	Eukaryota	TSAR	Alveolata
ASV60	0	0	0	0	0	0	0	0	4762	452	0	47	25	0	0	14	0	0	55	0	0	0	0	0	0	0	0	0	0	0	1	0	0	0	0	0	0	0	0	0	0	0	5356	7	0.995	assigned	Eukaryota	TSAR	Rhizaria
ASV602	0	0	0	0	0	0	0	0	0	0	0	34	0	0	0	0	0	0	0	0	0	0	86	0	0	0	0	106	52	0	0	0	0	5	0	7	0	0	0	0	0	0	290	6	0.994	assigned	Eukaryota	TSAR	Rhizaria
ASV612	0	0	0	0	0	0	0	0	0	0	0	0	0	0	0	0	0	0	0	9	0	0	0	0	0	0	0	73	0	0	0	0	0	0	0	11	0	0	0	0	165	0	258	4	0.9508	assigned	Eukaryota	TSAR	Stramenopiles
ASV614	0	0	0	0	0	0	0	0	0	0	0	0	166	0	0	0	0	0	39	0	5	0	0	0	0	0	0	0	0	0	0	0	0	0	0	0	0	0	46	0	0	0	256	4	0.997	assigned	Eukaryota	Obazoa	Opisthokonta
ASV615	0	0	0	0	0	0	0	0	0	0	0	2	0	0	0	0	0	0	0	0	0	0	0	0	0	0	0	22	0	0	0	0	7	3	0	0	222	0	0	0	0	0	256	5	1	assigned	Eukaryota	Obazoa	Opisthokonta
ASV620	0	0	0	0	0	0	0	0	0	0	0	12	0	0	0	0	0	0	0	1	0	0	0	0	0	0	0	0	0	0	0	212	27	0	0	0	0	0	0	0	0	0	252	4	1	assigned	Eukaryota	Obazoa	Opisthokonta
ASV623	0	0	0	0	0	0	0	0	189	0	0	0	0	0	0	0	0	0	0	12	3	0	0	0	0	0	0	0	46	0	0	0	0	0	0	0	0	0	0	0	0	0	250	4	1	assigned	Eukaryota	TSAR	Rhizaria
ASV629	0	0	0	0	0	0	0	0	0	0	0	115	0	0	125	0	0	0	0	0	8	0	0	0	0	0	0	0	0	0	0	0	0	0	0	0	0	0	0	0	0	0	248	3	0.972	assigned	Eukaryota	TSAR	Rhizaria
ASV634	0	0	0	0	0	0	0	0	0	0	0	22	0	0	0	0	0	0	0	0	0	0	0	0	0	0	0	183	42	0	0	0	0	0	0	0	0	0	0	0	0	0	247	3	0.92	unassigned	Eukaryota	TSAR	Alveolata
ASV64	0	0	0	0	0	0	0	0	0	0	0	0	0	0	0	0	0	0	0	0	0	0	0	0	0	0	0	0	0	0	0	0	0	47	6090	0	0	0	0	0	0	0	6137	2	1	assigned	Eukaryota	TSAR	Alveolata
ASV640	0	0	0	0	0	0	0	0	0	0	0	0	0	0	0	0	5	0	0	0	0	0	0	0	0	0	0	102	0	43	0	0	38	122	1	0	2	0	0	0	0	0	313	7	0.9189	unassigned	Eukaryota	TSAR	Alveolata
ASV647	0	0	0	0	0	0	0	0	65	0	0	0	175	0	0	0	0	0	0	0	0	0	0	0	0	0	0	0	0	0	0	0	0	0	0	0	0	0	0	0	0	0	240	2	0.973333	assigned	Eukaryota	TSAR	Alveolata
ASV65	0	0	0	0	0	0	0	0	0	0	0	543	0	0	0	2	0	0	0	6	18	0	0	0	0	0	0	0	0	0	4911	0	0	0	0	0	0	0	0	1	0	0	5481	6	1	assigned	Eukaryota	TSAR	Stramenopiles
ASV652	0	0	0	0	0	0	0	0	0	0	0	112	0	0	0	0	0	0	0	0	8	0	0	0	0	0	0	0	45	0	0	0	0	65	0	0	0	5	0	0	0	0	235	5	0.978667	assigned	Eukaryota	Obazoa	Opisthokonta
ASV659	0	0	0	187	0	0	0	0	0	0	81	0	0	0	0	0	0	0	0	0	0	0	0	0	0	0	0	0	0	0	0	0	0	0	0	0	0	0	0	0	0	0	268	2	0.909	unassigned	Eukaryota	TSAR	Alveolata
ASV67	0	0	0	399	0	0	51	0	0	299	0	393	0	0	104	135	199	0	0	0	19	9	0	0	7	8	0	0	50	611	0	0	85	135	6	0	2565	0	0	60	331	0	5466	19	1	assigned	Eukaryota	TSAR	Stramenopiles
ASV671	0	0	0	0	0	0	145	0	0	0	0	0	0	0	0	0	0	0	0	0	13	0	0	0	0	0	0	0	0	0	0	0	0	0	0	0	0	0	70	0	0	0	228	3	0.9942	assigned	Eukaryota	TSAR	Stramenopiles
ASV675	0	0	0	0	0	0	197	0	0	0	0	30	0	0	0	0	0	0	0	0	0	0	0	0	0	0	0	0	0	0	0	0	0	0	0	0	0	0	0	0	0	0	227	2	0.946333	assigned	Eukaryota	Obazoa	Opisthokonta
ASV677	0	0	0	0	0	0	0	0	0	0	0	0	0	0	139	0	10	0	0	0	0	0	0	0	0	0	0	0	0	0	0	0	14	48	0	15	0	0	0	0	0	0	226	5	0.997	assigned	Eukaryota	TSAR	Rhizaria
ASV683	0	0	0	0	0	0	0	0	0	0	0	5	0	0	0	0	0	0	0	0	0	0	0	0	0	0	0	0	0	0	0	0	0	0	0	0	218	0	0	0	0	0	223	2	0.908667	unassigned	Eukaryota	TSAR	Rhizaria
ASV69	0	0	0	0	0	0	0	0	33	821	0	0	1224	0	140	68	0	1713	0	38	40	19	164	0	0	450	0	4	0	0	0	0	0	0	0	0	0	4	0	0	158	0	4876	14	1	assigned	Eukaryota	TSAR	Alveolata
ASV7	3480	349	0	1	0	87	1877	0	12037	7489	19854	10254	4835	1594	2752	2642	21	2	2038	208	1222	304	184	27	8	2284	22	2920	201	25	0	0	198	129	2236	5	4	17	1065	35	1438	12	81856	37	0.974	assigned	Eukaryota	TSAR	Stramenopiles
ASV704	0	0	0	0	0	0	0	0	14	0	0	2	0	1	0	0	0	0	0	0	0	0	71	0	10	0	0	0	4	0	0	0	0	0	210	0	0	0	0	0	0	0	312	7	1	assigned	Eukaryota	TSAR	Alveolata
ASV716	0	0	0	0	0	0	0	0	4	0	0	0	147	0	0	0	0	0	0	0	0	0	0	0	0	0	0	0	0	0	0	0	0	0	0	0	0	0	0	55	0	0	206	3	0.8575	unassigned	Eukaryota	TSAR	Alveolata
ASV72	3	0	0	851	0	0	0	0	140	533	1284	784	675	0	0	78	0	0	303	0	95	63	109	0	2	155	0	2870	113	0	0	0	47	21	3	0	0	0	4	0	0	1	8134	21	0.983	assigned	Eukaryota	TSAR	Rhizaria
ASV732	0	0	0	0	0	0	0	0	0	0	0	97	0	0	0	0	34	0	0	0	8	0	0	0	0	0	0	0	0	0	0	0	0	0	0	0	0	0	0	59	0	0	198	4	1	assigned	Eukaryota	Obazoa	Opisthokonta
ASV736	0	0	0	0	0	0	0	0	0	0	0	4	0	0	45	0	0	0	0	0	5	0	143	0	0	0	0	0	0	0	0	0	0	0	0	0	0	0	0	0	0	0	197	4	0.979	assigned	Eukaryota	Obazoa	Opisthokonta
ASV737	0	0	0	0	0	0	0	0	0	0	0	0	0	0	0	0	0	0	194	0	0	0	0	0	0	0	0	0	0	0	0	0	0	3	0	0	0	0	0	0	0	0	197	2	0.98	assigned	Eukaryota	Obazoa	Opisthokonta
ASV740	0	0	0	0	0	0	0	0	0	0	0	0	178	0	0	0	0	0	0	0	0	18	0	0	0	0	0	0	0	0	0	0	0	0	0	0	0	0	0	0	0	0	196	2	0.970667	assigned	Eukaryota	TSAR	Stramenopiles
ASV749	0	10	0	0	0	0	0	0	0	48	0	0	0	0	0	135	0	0	0	0	0	0	0	0	0	0	0	0	0	0	0	0	0	0	0	0	0	0	0	0	0	0	193	3	1	assigned	Eukaryota	Obazoa	Opisthokonta
ASV750	0	0	0	0	0	0	0	0	0	0	0	0	0	0	0	0	0	0	0	0	0	0	180	0	0	0	0	0	6	0	0	0	0	7	0	0	0	0	0	0	0	0	193	3	1	assigned	Eukaryota	Obazoa	Opisthokonta
ASV751	0	0	0	0	0	0	0	0	0	0	0	0	0	0	0	0	0	0	0	0	0	0	0	0	0	0	0	0	0	0	0	176	11	6	0	0	0	0	0	0	0	0	193	3	0.917	unassigned	Eukaryota	TSAR	Alveolata
ASV752	0	0	0	0	0	0	0	0	0	0	0	0	0	0	0	0	0	0	0	11	0	0	0	0	0	0	0	0	7	0	0	0	4	170	0	0	0	0	0	0	0	0	192	4	0.8489	unassigned	Eukaryota	TSAR	Alveolata
ASV758	0	0	0	0	0	0	0	0	0	0	0	0	181	0	44	0	0	0	0	0	0	0	0	0	0	0	0	0	0	0	0	0	0	0	0	0	0	0	0	0	0	0	225	2	0.99	assigned	Eukaryota	Obazoa	Opisthokonta
ASV771	0	0	0	0	0	0	0	0	0	0	0	1	169	0	0	0	0	0	0	0	14	0	0	0	0	0	0	0	0	0	0	0	0	0	0	0	0	0	0	0	0	0	184	3	0.997	assigned	Eukaryota	TSAR	Alveolata
ASV773	0	0	0	0	0	0	0	0	0	0	0	0	0	0	0	0	0	0	0	23	0	0	0	0	0	0	0	0	0	0	0	0	68	93	0	0	0	0	0	0	0	0	184	3	1	assigned	Eukaryota	Obazoa	Opisthokonta
ASV778	0	0	0	0	0	0	0	0	0	0	0	0	0	0	48	0	0	73	0	158	0	0	0	0	0	0	0	0	0	0	0	0	0	0	0	0	0	0	0	0	0	0	279	3	0.997	assigned	Eukaryota	Obazoa	Opisthokonta
ASV78	0	0	0	0	0	0	0	0	79	410	0	1481	2159	0	278	12	0	0	496	30	0	0	0	4	0	0	0	3	0	0	0	0	0	0	0	0	0	0	0	0	0	0	4952	10	0.995	assigned	Eukaryota	Obazoa	Opisthokonta
ASV784	0	0	0	0	0	0	0	0	0	0	0	24	0	0	1	0	0	0	73	16	0	0	0	0	0	0	0	0	0	0	0	0	17	45	1	0	0	0	0	0	0	0	177	7	1	assigned	Eukaryota	Obazoa	Opisthokonta
ASV79	0	0	0	0	0	0	0	0	0	0	0	2243	0	0	34	0	47	0	0	0	3	0	12	0	0	3	0	864	317	0	0	221	349	619	2	0	1553	0	0	0	0	0	6267	13	1	assigned	Eukaryota	Obazoa	Opisthokonta
ASV796	0	0	0	0	0	0	0	0	0	0	0	33	0	0	57	0	0	0	0	0	0	0	0	0	0	0	0	0	10	0	0	0	35	38	0	0	0	0	0	0	0	0	173	5	1	assigned	Eukaryota	Obazoa	Opisthokonta
ASV8	20	0	0	24	0	0	3	0	10193	4798	4	11	168	4	29129	179	84	13219	1800	548	80	5628	2554	0	22	0	153	54	0	0	0	0	0	252	13	0	0	3	6609	0	0	0	75552	25	0.967	assigned	Eukaryota	TSAR	Rhizaria
ASV800	0	0	2	0	0	0	0	0	0	0	0	0	0	0	0	0	0	0	0	0	0	0	0	0	0	0	0	0	49	0	0	0	53	69	0	0	0	0	0	0	0	0	173	4	0.948	assigned	Eukaryota	Obazoa	Opisthokonta
ASV811	0	0	0	0	0	0	0	0	103	0	0	0	0	0	0	0	67	0	0	0	0	0	0	0	0	0	0	0	0	0	0	0	0	0	0	0	0	0	0	0	0	0	170	2	0.980333	assigned	Eukaryota	TSAR	Rhizaria
ASV813	0	0	0	0	0	0	0	0	0	0	0	1	0	0	0	0	0	0	0	0	0	0	0	0	159	0	0	0	5	0	0	0	0	4	0	0	0	0	0	0	0	0	169	4	0.985333	assigned	Eukaryota	TSAR	Stramenopiles
ASV82	2401	0	0	2	0	0	0	0	6	37	0	217	0	266	18	0	0	0	0	0	0	0	0	7	0	214	0	0	12	0	0	0	0	64	0	0	0	639	0	0	0	0	3883	12	0.912	unassigned	Eukaryota	TSAR	Stramenopiles
ASV824	0	0	0	0	0	0	0	0	0	0	0	133	0	0	0	0	0	0	0	0	0	0	0	0	0	0	0	0	33	0	0	0	0	0	0	0	0	0	0	0	0	0	166	2	0.994	assigned	Eukaryota	TSAR	Alveolata
ASV828	0	0	0	0	0	0	4	0	0	63	0	0	0	0	0	0	81	0	0	0	0	0	0	0	0	0	0	0	0	0	0	0	0	0	0	0	0	0	0	18	11	17	194	6	0.947	assigned	Eukaryota	TSAR	Rhizaria
ASV83	0	96	0	0	0	0	0	0	542	12	0	0	0	0	74	0	0	0	0	0	14	0	0	2899	0	44	0	0	0	0	0	0	15	0	0	0	0	0	0	1	2	0	3699	10	1	assigned	Eukaryota	TSAR	Rhizaria
ASV839	0	0	0	0	0	0	0	0	0	0	0	40	0	0	0	0	0	0	0	0	0	0	0	0	0	0	0	0	0	0	0	0	0	0	0	0	0	0	0	0	121	0	161	2	0.997	assigned	Eukaryota	Obazoa	Opisthokonta
ASV840	0	0	0	0	0	0	0	0	0	153	0	0	0	0	0	0	0	0	0	0	0	0	0	0	0	0	0	0	0	0	0	0	9	0	0	0	0	0	0	0	0	0	162	2	0.920333	unassigned	Eukaryota	TSAR	Alveolata
ASV852	0	0	0	0	0	0	0	0	0	0	0	0	2	0	0	0	0	0	0	5	0	2	149	0	0	0	0	0	0	0	0	0	0	0	0	0	0	0	0	0	0	0	158	4	0.93	unassigned	Eukaryota	TSAR	Rhizaria
ASV867	0	0	0	0	0	0	0	0	0	0	0	29	0	0	0	0	0	0	0	0	0	0	1	0	0	125	0	0	0	0	0	0	0	0	0	0	0	0	0	0	0	0	155	3	1	assigned	Eukaryota	Obazoa	Opisthokonta
ASV868	0	0	0	0	0	0	0	0	0	0	0	0	50	0	0	0	0	0	0	20	0	0	0	0	0	0	16	0	0	0	0	0	0	95	0	0	0	0	0	0	0	0	181	4	0.997	assigned	Eukaryota	TSAR	Alveolata
ASV87	0	0	0	0	0	0	0	0	0	0	0	0	0	0	6	0	0	0	0	0	2	0	0	0	0	0	0	171	0	0	0	0	1	0	4240	0	0	0	0	0	0	0	4420	5	0.997	assigned	Eukaryota	TSAR	Alveolata
ASV88	0	0	0	0	0	67	0	0	176	247	0	597	939	0	0	46	5	337	756	0	41	27	1171	10	0	0	1	453	90	0	0	0	8	146	0	0	79	2	36	0	58	0	5292	22	0.997	assigned	Eukaryota	Archaeplastida	Chloroplastida
ASV885	0	0	0	0	0	0	0	0	14	0	0	0	0	0	0	57	8	0	0	0	0	0	0	0	0	0	0	0	52	0	0	0	0	18	0	0	0	0	0	0	0	0	149	5	0.956	assigned	Eukaryota	Obazoa	Opisthokonta
ASV89	0	0	0	0	0	0	0	0	2317	131	0	7	0	0	0	0	0	0	0	21	2	0	4	10	0	0	0	526	27	37	0	21	11	63	0	88	0	0	0	0	12	6	3283	16	0.997	assigned	Eukaryota	TSAR	Alveolata
ASV890	0	0	0	0	0	0	0	0	0	0	0	0	0	0	26	0	0	0	0	59	0	0	0	0	0	0	0	0	62	0	0	0	0	0	0	0	0	0	0	0	0	0	147	3	0.8225	unassigned	Eukaryota	TSAR	Alveolata
ASV904	0	0	0	0	0	0	0	0	0	0	0	7	99	0	0	0	0	0	0	0	0	4	0	0	0	0	0	0	18	0	0	0	0	23	0	0	0	0	0	0	0	0	151	5	0.971	assigned	Eukaryota	TSAR	Alveolata
ASV910	0	0	0	0	0	0	0	0	0	0	0	24	104	0	4	6	0	0	0	0	0	0	0	0	0	0	0	0	0	0	0	0	0	0	0	0	0	0	0	0	0	0	138	4	0.979667	assigned	Eukaryota	Obazoa	Opisthokonta
ASV912	0	0	0	0	0	0	0	0	0	0	0	0	0	0	0	0	0	0	0	0	0	0	0	0	0	0	0	0	106	0	0	0	7	38	0	0	0	0	0	0	0	0	151	3	0.952	assigned	Eukaryota	TSAR	Alveolata
ASV92	0	0	0	0	0	0	0	0	0	0	866	0	0	0	0	9	0	0	0	20	0	0	0	0	0	0	0	0	73	0	0	0	51	6	1944	0	583	0	0	0	0	0	3552	8	0.9909	assigned	Eukaryota	Obazoa	Opisthokonta
ASV922	0	0	0	0	0	107	21	0	6	2	0	0	0	0	0	0	0	0	0	0	0	0	0	0	0	0	0	0	0	0	0	0	0	0	0	0	0	0	0	0	0	0	136	4	0.986	assigned	Eukaryota	TSAR	Alveolata
ASV929	0	0	0	0	0	0	0	0	0	0	0	0	0	0	0	0	0	0	0	0	0	0	0	0	0	0	0	58	16	0	0	0	9	0	0	0	0	0	0	0	40	0	123	4	1	assigned	Eukaryota	TSAR	Alveolata
ASV93	0	0	0	0	3214	0	0	0	23	0	0	0	0	0	17	21	76	0	0	0	0	0	0	0	0	0	0	0	0	0	0	0	4	17	0	0	0	1	0	0	0	0	3373	8	0.994	assigned	Eukaryota	TSAR	Rhizaria
ASV937	0	0	0	0	0	0	0	0	0	0	0	0	0	0	0	167	0	0	0	13	0	0	0	0	0	0	0	0	0	0	0	0	0	0	0	0	0	0	0	0	0	0	180	2	0.97	assigned	Eukaryota	TSAR	Alveolata
ASV94	0	1	2	0	0	0	44	754	118	76	125	793	10	0	0	30	0	657	285	25	20	0	79	0	0	0	4	561	39	0	0	0	0	0	0	0	0	0	0	4	0	0	3627	19	0.905333	unassigned	Eukaryota	TSAR	Stramenopiles
ASV95	0	115	0	0	0	0	0	0	967	719	32	376	4	0	0	209	28	3	2	0	0	42	497	0	0	0	0	1038	61	0	0	0	13	99	0	0	0	0	0	408	0	2	4615	18	1	assigned	Eukaryota	TSAR	Rhizaria
ASV958	0	0	0	0	0	0	0	0	0	0	0	112	0	0	0	0	0	0	0	0	0	0	0	0	0	0	0	0	0	0	0	0	0	6	0	9	0	0	0	0	0	0	127	3	0.975	assigned	Eukaryota	TSAR	Alveolata
ASV974	0	0	0	0	0	0	0	0	0	0	0	85	0	0	0	0	0	0	0	0	0	27	0	0	0	0	0	0	0	0	0	0	3	9	0	0	0	0	0	0	0	0	124	4	0.997	assigned	Eukaryota	TSAR	Alveolata
ASV987	0	0	0	0	0	0	0	0	0	18	0	0	0	0	0	0	0	0	0	0	0	0	0	0	0	0	0	34	51	0	0	0	17	0	0	0	0	0	0	0	0	0	120	4	1	assigned	Eukaryota	TSAR	Rhizaria
ASV996	0	0	0	0	0	0	0	0	0	0	0	13	0	0	0	0	0	0	0	25	0	0	0	0	0	0	0	0	0	0	0	0	18	0	0	0	0	0	0	0	61	0	117	4	0.8056	unassigned	Eukaryota	TSAR	Rhizaria
[truncated: 11 more columns]

## Sheet: Table S3
Table S04. Pairwise comparisons between groups (Benjamini-Hochberg corrected p < 0.05 calculated using permutation test (PERMANOVA) with 1000 permutations).
Group1	Group2	F	R2	P_value	P_value (BH)
Late Holocene	Mid Holocene	1.06966	0.0665641	0.354	0.45
Late Holocene	Early Holocene	2.08488	0.0769757	0.002	0.01
Late Holocene	Yonger Dryas	1.80418	0.0867218	0.009	0.03
Late Holocene	Bølling-Allerød	0.992654	0.05517	0.492	0.492
Mid Holocene	Early Holocene	0.993395	0.0662555	0.407	0.452222
Mid Holocene	Yonger Dryas	1.47336	0.155527	0.075	0.15
Mid Holocene	Bølling-Allerød	1.0192	0.145202	0.36	0.45
Early Holocene	Yonger Dryas	2.2814	0.112487	0.001	0.01
Early Holocene	Bølling-Allerød	1.20607	0.0700956	0.175	0.291667
Yonger Dryas	Bølling-Allerød	1.69537	0.14496	0.014	0.035
Permutation test for adonis under reduced model
Permutation: free
Number of permutations: 999
adonis2(formula = dist_matrix ~ Group, data = pcoa_axis_values)
	Df	SumOfSqs	R2	F	Pr(>F)
Model	4	1.6197	0.14242	1.5362	0.003**
Residual	37	9.7528	0.85758
Total	41	11.3726	1
---
Signif. codes: 0 ‘***’ 0.001 ‘**’ 0.01 ‘*’ 0.05 ‘.’ 0.1 ‘ ’ 1
Permutation test for homogeneity of multivariate dispersions
Permutation: free
Number of permutations: 999
Response: Distances
	Df	Sum Sq	Mean Sq	F	N.Perm	Pr(>F)
Groups	4	0.1653	0.041324	3.9117	999	0.017*
Residuals	37	0.39088	0.010564
---
Signif. codes: 0 ‘***’ 0.001 ‘**’ 0.01 ‘*’ 0.05 ‘.’ 0.1 ‘ ’ 1

## Sheet: Table S4
Table S06. 172 indicator ASVs identified throughy three methods:DESeq2, sPLS regression analysis, and Spearman coefficent analysis. The sumMethods column indicates the number of methods the ASV was identified in, Highligted 46 ASVs identifed in atleast two methods, or morethan two palo proxis which indicate simialr envirmental variable.
		Paleo proxies																																										Species	Distribution	Reference
		Atlantic water indicator (O. centrocarpum %)						Mean grain size <0-63> [µm]						Glaciomarine species (E. excavatum, C. reniforme) %						%C37:4						Sea ice Indicator (E. karaense %)						SST UK37*						Atlantic Water indicators (N.labradorica B.frigida) %
		Spearman		sPLS		DESeq2		Spearman		sPLS		DESeq2		Spearman		sPLS		DESeq2		Spearman		sPLS		DESeq2		Spearman		sPLS		DESeq2		Spearman		sPLS		DESeq2		Spearman		sPLS		DESeq2
ASVs	functional ecological Group	Correlation	P (BH)	Correlation2	P (BH)3	log2FoldC	P (BH)4	Correlation5	P (BH)6	Correlation7	P (BH)8	log2FoldC9	P (BH)10	Correlation11	P (BH)12	Correlation13	P (BH)14	log2FoldC15	P (BH)16	Correlation17	P (BH)18	Correlation19	P (BH)20	log2FoldC21	P (BH)22	Correlation23	P (BH)24	Correlation25	P (BH)26	log2FoldC27	P (BH)28	Correlation29	P (BH)30	Correlation31	P (BH)32	log2FoldC33	P (BH)34	Correlation35	P (BH)36	Correlation37	P (BH)38	log2FoldC39	P (BH)40	Species	Distribution	Reference
ASV265	microzooplankton	0.0888084	0.59	0.182801	0.154145	-2.171	0.338583	0.057295	0.73	0.188607	0.140975	-6.00059	0.00116207	-0.107636	0.51	-0.0728033	0.122285	-15.8214	4.71774e-25	-0.16452	0.32	-0.147578	0.140975	-10.8706	1.93212e-11	0.0136376	0.93	-0.172552	0.143934	-5.07659	0.00674315	0.372496	0.02	0.1711	0.149162	16.0494	1.82322e-26	0.182689	0.27	0.0403571	0.143934	9.35304	7.12699e-09	Cyclotrichium	north atlanitc	OBIS
ASV144	other heterotrophs-Cercozoan	-0.236194	0.15	-0.0455365	0	-30	3.64287e-89	-0.0471424	0.78	-0.0330617	0	8.4427	4.89138e-07	-0.308186	0.06	-0.0904705	0.00546	-26.4305	2.61226e-69	0.131317	0.43	-0.0557803	0.0319165	-6.04643	0.000743432	0.0216321	0.9	-0.0325389	0.0216667	2.57167	NA	0.0471281	0.78	0.0551034	0	4.99938	0.00597565	0.34013	0.03	0.0869539	0	17.7966	7.31997e-32	Paulinella	globaly widespread	OBIS/NCBI
ASV20	other heterotrophs-Cercozoan	0.0196663	0.91	0.316753	0	1.9042	0.321089	-0.106749	0.52	0.319991	0	1.3832	0.625319	0.00877332	0.96	-0.0729257	0.00546	-3.71808	0.0834123	-0.165021	0.32	-0.210366	0.00546	-2.49997	0.317515	-0.134726	0.41	-0.261981	0	-1.20619	0.682137	0.343823	0.03	0.248584	0	3.29988	0.0423372	0.00824807	0.96	0.0223884	0	-0.471185	0.882143	CCW10-lineage_X	atlantic*, svalbard	OBIS/NCBI; KY077717.1
ASV257	other heterotrophs-Cercozoan	-0.383772	0.02	0.0997337	0.372632	-0.504918	0.847849	-0.044914	0.79	0.131194	0.892752	0.680345	0.793822	-0.145173	0.38	-0.260455	0.364966	-1.28414	0.62916	-0.262216	0.11	-0.268603	0.630697	-1.76271	0.411672	-0.152134	0.36	-0.247635	0.552219	-1.185	0.677765	0.433797	0.01	0.291969	0.13617	2.67137	0.0873053	0.338286	0.04	0.219179	0.383449	1.17412	0.726113	Protaspa-lineage_X
ASV46	other heterotrophs-Cercozoan	-0.0254556	0.88	0.190856	0.00546	-1.34911	0.510066	0.110814	0.5	0.203196	0.00546	2.47617	0.35542	-0.0247936	0.88	-0.124997	0.00546	-1.94399	0.467856	-0.126336	0.44	-0.195821	0	-1.32299	0.611587	-0.223299	0.17	-0.214218	0	-0.0226196	0.990172	0.406853	0.01	0.222717	0.0396062	1.43098	0.442556	0.138281	0.4	0.0858892	0.00546	3.44694	0.0208568	Ventricleftida_XX	svalbard	NCBI;EU371397.1
ASV623	other heterotrophs-Cercozoan	-0.121679	0.46	0.142299	0.660823	0.435823	NA	-0.0346077	0.83	0.175258	0.476858	-0.172987	NA	-0.372112	0.02	-0.278555	0.845989	-1.72626	NA	-0.450125	0	-0.303944	0.92471	-1.6109	NA	-0.149187	0.36	-0.288612	0.576605	-0.460464	NA	0.482438	0	0.332842	0.712429	2.10821	NA	0.379993	0.02	0.229601	0.441745	1.74328	NA	Protaspa-lineage_X	Svalbard, Arctic	EU050977.1
ASV83	other heterotrophs-Cercozoan	0.0300719	0.86	0.193047	0.190258	-1.91733	0.379373	0.00290226	0.99	0.193271	0.172909	-5.44266	0.00196368	0.0279588	0.87	-0.0308023	0.313688	-3.28899	0.0975407	-0.0875645	0.6	-0.116584	0.274944	-7.13941	3.32307e-09	-0.174386	0.29	-0.150179	0.278038	-2.67825	0.238695	0.235276	0.15	0.139225	0.300129	4.06478	0.0133247	-0.00950024	0.95	0.00145907	0.198141	5.75733	5.72424e-05	Protaspa-lineage_X	north atlantic; canada	KC488557.1
ASV346	other heterotrophs-Labyrinthulean	-0.190385	0.25	-0.120988	0.212504	-4.87232	0.0113377	-0.30828	0.06	-0.087311	0.220154	-6.60755	0.000223542	-0.339428	0.03	-0.244525	0.216079	-4.5035	0.023465	-0.350531	0.03	-0.151741	0.317846	-30	1.05476e-87	0.114138	0.49	-0.0893397	0.359344	-2.31275	0.341531	0.381791	0.02	0.150141	0.180415	28.4472	7.91068e-99	0.28662	0.08	0.234738	0.180415	6.87336	5.4611e-05	Labyrinthulomycetes_LAB1	found in japan, USA	NCBI
ASV10	other heterotrophs-MAST	-0.272566	0.09	0.237654	0.425887	-1.23003	0.0421507	0.0884095	0.59	0.238567	0.417035	-0.526152	0.549995	0.0726905	0.66	-0.0428824	0.146831	-1.02132	0.150195	-0.151853	0.36	-0.147752	0.271239	-1.17076	0.0607654	-0.103504	0.53	-0.188332	0.176318	-0.595764	0.512413	0.289091	0.07	0.175861	0.349323	1.84521	0.000284509	0.285085	0.08	0.00622886	0.353605	2.09886	3.21584e-05	MAST-9D	atlantic	NCBI; DQ504337.1
ASV21	other heterotrophs-MAST	-0.383837	0.02	0.16667	0.10759	-2.20894	0.02666	-0.0503216	0.76	0.197078	0.159737	-0.989025	0.509237	-0.13749	0.4	-0.262319	0.049	-1.89889	0.088954	-0.284983	0.08	-0.301514	0.0147	-3.86917	5.19082e-06	-0.0427952	0.8	-0.293577	0	-1.72568	0.154649	0.51873	0	0.33231	0.401926	3.04474	0.000284509	0.364852	0.02	0.21181	0.153438	3.09067	0.000251465	MAST-9A	North Atlantic, teropical and temperature region	https://doi.org/10.1093/femsec/fiae130
ASV55	phytoplankton	-0.281473	0.08	-0.0518767	0.0396062	-30	3.64287e-89	-0.0455533	0.78	-0.0404445	0.0339901	-11.2504	1.29927e-12	-0.237229	0.15	-0.0813823	0.0466098	-29.5287	2.95615e-86	-0.1382	0.4	-0.0450693	0.14238	-20.4323	7.44806e-41	-0.0230552	0.89	-0.0219903	0.118831	-6.47547	0.000223477	0.226109	0.17	0.0432634	0.0181137	19.0327	8.57204e-36	0.28874	0.07	0.0796919	0.0216667	17.5016	5.78199e-31	Pyramimonas	Arctic, north atlatic	OBIS/NCBI
ASV354	unassigned	-0.168006	0.31	-0.091363	0.00546	-4.84013	0.0116341	-0.0876728	0.6	-0.0678964	0	-3.4281	0.159885	-0.242949	0.14	-0.169329	0.00546	-4.37327	0.0286212	-0.208726	0.2	-0.10153	0.0181137	-2.16216	0.411672	-0.00309944	0.99	-0.0568094	0.00546	-1.64915	0.542784	0.152996	0.35	0.0995903	0.00546	3.78454	0.025239	0.162305	0.32	0.163575	0	6.49915	0.00013664	unassigned
ASV94	unassigned	0.110022	0.5	0.226008	0.488393	0.521111	0.701091	0.357074	0.03	0.243286	0.550102	0.883131	0.509237	-0.196627	0.23	-0.168805	0.552219	-0.739782	0.632777	-0.249607	0.13	-0.2496	0.354645	-1.53774	0.152834	-0.346026	0.03	-0.268128	0.424938	-1.55463	0.139804	0.477912	0	0.282441	0.653182	1.56239	0.0978739	0.30527	0.06	0.120275	0.666271	0.461769	0.865941	unassigned
ASV278	zoobenthos	0.129371	0.43	0.178274	0.169703	-2.8333	0.135347	0.304279	0.06	0.186386	0.173727	3.06114	0.164769	0.140769	0.39	-0.0901128	0.193582	-3.60517	0.0834123	0.0942477	0.57	-0.160209	0.160865	-2.97801	0.163461	-0.165754	0.31	-0.181569	0.160865	1.87921	0.497545	0.241468	0.14	0.18406	0.148005	9.01677	3.45327e-10	-0.00366045	0.98	0.056429	0.194563	5.00717	0.00281856	Tharyx	in North atlantic, arctic	OBIS/NCBI
ASV500	mesozooplankton	0.0584564	0.72	0.000800634	0.491333	-3.08263	0.135347	-0.187604	0.25	-0.0485227	0.5145	-2.42657	0.376349	0.456977	0	0.384683	0.469096	3.23279	0.153972	0.413749	0.01	0.327411	0.383449	2.23705	0.383594	0.40427	0.01	0.266966	0.434926	3.33546	0.110615	-0.468475	0	-0.34568	0.303753	-3.48708	0.0245803	-0.446488	0	-0.343707	0.38967	-2.97436	NA	Oikopleura	Arctic	NCBI
ASV123	microzooplankton	-0.137692	0.4	-0.127144	0.172407	-30	3.64287e-89	-0.0301923	0.86	-0.148375	0.106745	-2.49185	0.365734	0.0386556	0.82	0.184775	0.198927	4.31279	0.0318661	-0.00158851	0.99	0.216943	0.00546	3.47636	0.0961441	0.0794124	0.63	0.213291	0.0181137	4.75148	0.00981016	-0.0232993	0.89	-0.239704	0.0704646	-7.86442	1.54059e-06	0.0656949	0.69	-0.147882	0.098068	-3.75154	0.0722956	Strombidium	north atlanitc; cold water	OBIS/NCBI
ASV54	microzooplankton	-0.182761	0.27	-0.0568008	0.162145	-0.186399	0.922035	-0.0167071	0.92	-0.0927789	0.154145	-1.04647	0.509237	0.294815	0.07	0.289237	0.638475	0.781947	0.67769	0.27527	0.09	0.273037	0.191767	1.14608	0.428346	0.163294	0.32	0.239014	0.623201	2.5383	0.00501166	-0.13231	0.42	-0.293068	0.215064	-1.09658	0.410867	-0.153769	0.35	-0.250681	0.203947	-0.568979	0.865941	Heteracon	Arctic, north atlatic	KJ758730.1 (arctic); JN811212.1 (japan)
ASV136	parasites	0.171055	0.3	0.0192606	0	-3.9596	0.0457613	0.310928	0.05	0.0298129	0	28.791	6.42323e-81	-0.0974334	0.56	-0.0852236	0.0181137	-14.157	3.91467e-20	-0.0995464	0.55	-0.0816316	0.0396062	-8.7055	1.70634e-07	-0.210913	0.2	-0.0721091	0.0359887	0.0939111	NA	0.193278	0.24	0.0878106	0	11.2512	8.62252e-13	0.109138	0.51	0.0735224	0	6.3922	0.000185276	Dino-Group-I-Clade-6_X
ASV204	mixoplankton	-0.0814995	0.62	-0.088935	0.13861	-5.71876	0.00013903	-0.0419271	0.8	-0.120857	0.117299	-2.94454	NA	0.217149	0.18	0.262425	0.211298	2.33204	0.211059	0.15701	0.34	0.265228	0.182083	4.61522	0.000329937	0.115075	0.49	0.241802	0.185601	5.79868	1.1494e-05	-0.23198	0.16	-0.287504	0.203947	-5.5013	0.000336115	-0.0729035	0.66	-0.222395	0.139555	-2.02789	0.546942	Heterocapsa	Arctic, north atlatic	OBIS/NCBI
ASV615	nekton	-0.157684	0.34	-0.0661724	0.211298	-1.97505	NA	-0.0381656	0.82	-0.131786	0.216079	-1.68195	NA	0.47466	0	0.521852	0.237968	1.41134	NA	0.382043	0.02	0.475633	0.207752	1.80597	NA	0.338531	0.04	0.40702	0.207752	2.00532	NA	-0.391035	0.01	-0.507792	0.165846	-1.62408	NA	-0.310616	0.05	-0.457188	0.237968	-1.49106	NA	Gadus	Arctic, north atlatic	OBIS/NCBI
ASV87	other heterotrophs-benthic ciliates	-0.30988	0.05	-0.0822921	0.100025	-7.02887	3.66832e-05	-0.213483	0.19	-0.111598	0.0871111	-4.33449	0.00196368	0.328403	0.04	0.241016	0.117299	4.83825	0.000419587	0.236055	0.15	0.243877	0.166581	4.93609	0.00598541	0.142342	0.39	0.222485	0.128191	4.78244	0.0095465	-0.0301399	0.86	-0.264403	0.0377397	-6.79453	4.74048e-05	-0.144239	0.38	-0.204169	0.0583511	-6.87879	5.76608e-05	Holosticha	europe, svalbard	OBIS/NCBI
ASV268	other heterotrophs-Choanoflagellatea	-0.041752	0.8	-0.0282809	0.148005	-0.329994	0.918148	-0.0762653	0.64	-0.0726157	0.205604	-0.180031	0.938521	0.130724	0.43	0.350141	0.0871111	0.0902928	0.979068	0.175042	0.29	0.311587	0	0.418339	0.860083	0.341889	0.03	0.262343	0.00546	2.6979	0.194498	-0.294169	0.07	-0.331396	0.520759	-0.733102	0.751748	-0.195782	0.23	-0.308929	0.187186	0.0936481	NA	Stephanoecidae_Group_H_X	Arctic	KJ762435.1; Arctic Ocean
ASV92	other heterotrophs-Choanoflagellatea	-0.179601	0.27	-0.137364	0.0339901	-2.50596	0.148846	-0.043905	0.79	-0.168229	0.0147	-1.43997	0.510063	0.175423	0.29	0.26147	0.0339901	1.09527	0.720316	0.107285	0.52	0.287077	0.0445158	2.10368	0.272552	0.291593	0.07	0.27344	0.0377397	3.67827	0.00798522	-0.0933774	0.57	-0.314619	0.00546	-2.3137	0.200638	-0.0706067	0.67	-0.215007	0.00546	-0.861618	0.865941	Calliacantha	Arctic	KF534540.1; Krossfjorden Glacier; KU587842.1
ASV101	parasites	-0.137692	0.4	-0.124219	0.0377397	-30	3.64287e-89	-0.0301923	0.86	-0.147472	0.0181137	-3.04224	0.220636	0.0386556	0.82	0.200102	0.0417529	5.18948	0.00609977	-0.00158851	0.99	0.228634	0.13617	4.2335	0.0338789	0.0794124	0.63	0.221998	0.10759	5.69302	0.00159932	-0.0232993	0.89	-0.251806	0.0106462	-9.22472	8.10254e-09	0.0656949	0.69	-0.161966	0.0147	-4.71735	0.0128001	Mermithidae_X	baltic Sea	OBIS/NCBI
ASV213	parasites	0.086322	0.6	-0.0750567	0.151762	-4.07556	0.0409883	-0.0884582	0.59	-0.120936	0.172407	-4.37372	0.0404378	0.252585	0.12	0.369232	0.151762	13.2819	9.02183e-18	0.250455	0.12	0.349743	0.228377	4.57547	0.017722	0.0680271	0.68	0.306817	0.186314	3.79949	0.0577587	-0.145621	0.38	-0.375594	0.230613	-2.84713	NA	-0.265958	0.1	-0.319669	0.18438	-15.1523	NA	Dino-Group-II-Clade-7_X	Eastern North Pacific	NCBI; JX842574.1;KJ762258.1
ASV342	parasites	-0.461554	0	-0.0516386	0.443603	-2.82412	0.0871947	-0.147527	0.37	-0.0878915	0.377683	-1.28557	0.602901	0.38648	0.02	0.290604	0.769061	1.59845	0.520743	0.245943	0.13	0.271786	0.864158	1.02159	0.666765	0.32962	0.04	0.236521	0.744767	0.87944	0.729881	-0.155121	0.35	-0.291316	0.261857	-0.618241	NA	-0.175328	0.29	-0.252598	0.346987	-1.16162	0.787775	Dino-Group-I-Clade-1_X	greenland	NCBI; EU182816.1
ASV391	parasites	-0.157241	0.34	-0.0325536	0.595285	-3.45506	0.0871947	-0.0153812	0.93	-0.0737789	0.10759	-1.82378	0.509237	0.185287	0.26	0.326524	0.150814	1.54095	0.632777	0.344417	0.03	0.293463	0.0377397	5.47827	0.00269191	0.302919	0.06	0.24877	0.468488	4.4109	0.0200488	-0.281775	0.08	-0.312614	0.272218	-4.44053	0.0115265	-0.0288456	0.86	-0.287258	0.623954	-1.62346	0.681951	Dino-Group-I-Clade-4_X	Eastern North Pacific; South China Sea	NCBI; KF494209.1; JX842127.1
ASV958	parasites	-0.0501628	0.76	0.137266	0	0.223214	NA	0.20595	0.21	0.0930099	0	0.954713	NA	0.353075	0.03	0.324615	0	1.05391	NA	0.295018	0.07	0.212367	0.860672	0.780759	NA	0.184958	0.26	0.134175	0.0396062	1.58065	NA	-0.354937	0.03	-0.212803	0	-1.76671	NA	-0.196788	0.23	-0.308471	0.0147	-0.981593	NA	Paralecudina	canada….	OBIS/NCBI
ASV153	phytoplankton	-0.137692	0.4	-0.126908	0.0466098	-30	3.64287e-89	-0.0301923	0.86	-0.148367	0.00546	-2.47683	0.366205	0.0386556	0.82	0.186513	0.0246051	4.27361	0.0333038	-0.00158851	0.99	0.218314	0.0776604	3.45125	0.0977906	0.0794124	0.63	0.214343	0.0871111	4.7159	0.0102767	-0.0232993	0.89	-0.241132	0.00546	-7.73523	2.26595e-06	0.0656949	0.69	-0.149466	0.0246051	-3.70987	0.0756083	Prorocentrum	Arctic, north atlatic ; wide range	OBIS/NCBI
ASV18	phytoplankton	-0.0285196	0.86	0.215496	0.00546	-1.00553	0.224472	0.0245012	0.88	0.171061	0	-1.2131	0.156765	0.409774	0.01	0.314239	0.00546	0.564569	0.658251	0.105506	0.52	0.166918	0.0282215	1.31743	0.07996	0.134615	0.41	0.0747815	0.00546	1.7717	0.00747774	-0.0369698	0.82	-0.15828	0.00546	-0.783819	0.394233	-0.110558	0.5	-0.309762	0	-0.308132	0.865941	Chaetoceros	globaly widespread/ arctic cold water	OBIS
ASV64	phytoplankton	-0.258436	0.11	-0.11417	0	-30	3.64287e-89	-0.0603847	0.71	-0.151444	0	-2.73676	0.323893	0.360609	0.02	0.307979	0	21.4697	1.29192e-45	0.300228	0.06	0.315853	0.00546	10.12	3.21756e-10	0.366037	0.02	0.290311	0.00546	12.302	7.11375e-15	-0.174215	0.29	-0.34307	0.0871111	-12.9821	5.7572e-17	-0.246356	0.13	-0.259678	0	-30	2.03961e-88	Prorocentrum	Arctic, north atlatic ; wide range	OBIS/NCBI
ASV178	unassigned	0.155636	0.34	-0.0405439	0.160865	-4.00619	0.044219	0.0587177	0.72	-0.0933654	0.00546	-3.14192	0.197092	0.259878	0.11	0.418197	0.209879	12.9807	4.88425e-17	0.243548	0.14	0.375315	0.254706	4.01605	0.0452912	-0.0251948	0.88	0.317846	0.187186	4.0829	0.0356779	-0.228119	0.16	-0.399717	0.892752	-3.7434	NA	-0.187913	0.25	-0.368062	0.0359887	-9.37746	NA	unassigned
ASV218	unassigned	-0.219138	0.18	-0.117958	0.169703	-30	3.64287e-89	0.057295	0.73	-0.16297	0.151762	-1.57796	0.55962	0.316756	0.05	0.368919	0.10759	4.53962	0.0232296	0.184509	0.26	0.369552	0.0510802	3.83869	0.0575531	0.35003	0.03	0.335214	0.053413	5.02588	0.00674315	-0.229495	0.16	-0.400093	0.186314	-7.95048	1.11051e-06	-0.154035	0.35	-0.313599	0.273195	-4.01377	0.0491125	unassigned
ASV252	unassigned	0.116508	0.48	-0.0613156	0.211298	-4.17657	0.0356173	0.00211876	0.99	-0.11256	0.237238	-3.30042	0.178256	0.182158	0.27	0.409018	0.229673	12.3322	1.9413e-15	0.220273	0.18	0.377214	0.218874	4.06533	0.0441264	0.0680271	0.68	0.325318	0.21709	4.3819	0.0208081	-0.316658	0.05	-0.403457	0.246027	-2.21763	NA	-0.145164	0.38	-0.35706	0.250739	-2.03185	NA	unassigned
ASV53	unassigned	-0.167878	0.31	-0.126368	0.0466098	-30	3.64287e-89	-0.22141	0.18	-0.158652	0.0466098	-4.95282	0.0133609	0.350548	0.03	0.270881	0.00546	21.387	2.17729e-45	0.270046	0.1	0.289951	0	8.0083	1.55068e-06	0.376853	0.02	0.27265	0	12.2552	7.11375e-15	-0.234581	0.15	-0.316736	0.0377397	-12.9202	6.68326e-17	-0.201058	0.22	-0.224896	0.0377397	-30	2.03961e-88	unassigned
ASV640	unassigned	-0.292264	0.07	-0.0632434	0.281507	-2.63128	0.150989	-0.0954526	0.56	-0.113041	0.278998	0.650119	NA	0.42715	0.01	0.398018	0.253673	1.59678	0.527977	0.313335	0.05	0.368744	0.239959	1.85367	NA	0.408777	0.01	0.318955	0.2423	1.74837	0.459467	-0.296587	0.07	-0.394672	0.272218	-1.90773	NA	-0.260935	0.11	-0.346975	0.297887	-1.30856	NA	unassigned
ASV751	unassigned	-0.15252	0.35	-0.0429881	0.148005	-1.45765	NA	0.11971	0.47	-0.0895279	0.148005	0.111464	NA	0.381791	0.02	0.369556	0.297887	0.973595	NA	0.236688	0.15	0.335013	0.247087	0.868447	NA	0.388808	0.01	0.285653	0.218227	1.44905	NA	-0.290712	0.07	-0.357362	0.053413	-1.35861	NA	-0.26225	0.11	-0.324286	0.150814	-0.946512	NA	unassigned
ASV104	zoobenthos	-0.247542	0.13	-0.0527075	0.211298	-2.97056	0.0250296	-0.0533052	0.75	-0.103136	0.217574	-1.28093	0.509237	0.367352	0.02	0.401361	0.216079	0.73874	0.828703	0.337524	0.04	0.366662	0.307078	1.91961	0.215679	0.294096	0.07	0.314252	0.351522	1.44751	0.417735	-0.235646	0.15	-0.391595	0.178714	-1.0464	0.554564	-0.191885	0.24	-0.351383	0.180415	-0.571107	NA	Ctenodiscus	Arctic, north atlatic	OBIS
ASV137	zoobenthos	-0.113175	0.49	0.00253346	0.0396062	-2.8861	0.0305103	0.102775	0.53	-0.0650386	0.0608968	-0.857645	0.670718	0.471119	0	0.526792	0.0319165	2.52393	0.0834123	0.451049	0	0.447691	0.0246051	3.34236	0.00429601	0.186807	0.25	0.364629	0.0246051	2.01163	0.183503	-0.268796	0.1	-0.47255	0.0799697	-1.68728	0.238813	-0.289716	0.07	-0.470873	0.0704646	-2.36447	NA	Tridonta	europe, svalbard	OBIS/NCBI
ASV38	other heterotrophs-MAST	-0.0854278	0.61	0.176739	0.0181137	2.15506	0.0739892	0.0921937	0.58	0.194228	0.0181137	-0.369558	0.855352	-0.146464	0.37	-0.163037	0	-3.32689	0.00137029	-0.208042	0.2	-0.221629	0.00546	-4.67106	1.6999e-06	-0.00157922	0.99	-0.231255	0.00546	4.13032	4.26447e-05	0.208379	0.2	0.248792	0.049	-0.309122	0.854721	0.323995	0.04	0.121772	0.0510802	-0.0683095	0.991408	MAST-9A	North Atlantic, teropical and temperature region	https://doi.org/10.1093/femsec/fiae130
ASV8	other heterotrophs-Cercozoan	-0.0971253	0.56	0.251683	0.387685	-0.0260416	0.983541	0.310563	0.05	0.267123	0.376675	-0.315171	0.847614	-0.147798	0.37	-0.158334	0.133489	-0.283899	0.979068	-0.221168	0.18	-0.252692	0.243713	-0.717591	0.589425	-0.0894723	0.59	-0.277971	0.165846	-0.739461	0.590241	0.359441	0.02	0.287849	0.313688	0.45742	0.72043	0.272258	0.09	0.107457	0.321111	0.0265269	NA	Cercozoa_XXX	atlanitc*	KC787460.1 found n anoxix black sea
ASV704	microzooplankton	-0.0563516	0.73	-0.0429379	0.0377397	-1.80524	0.342016	-0.0958549	0.56	-0.0340802	0	-2.43188	0.197092	-0.212224	0.19	-0.062643	0.0181137	0.919529	0.806372	-0.256985	0.11	-0.0332846	0.0631261	1.13839	0.642192	-0.0542321	0.74	-0.0149215	0.0704646	1.96685	0.30721	0.273939	0.09	0.0315648	0	-0.161446	0.948732	0.292239	0.07	0.0617476	0.0181137	-0.797582	0.865941	Cyclotrichium	north atlanitc	OBIS
ASV974	parasites	-0.0584367	0.72	0.115445	0.0246051	-0.625646	NA	0.133047	0.42	0.0780438	0.0147	0.45399	NA	0.17337	0.29	0.274417	0.0339901	-0.294722	NA	0.28868	0.07	0.179805	0.0417529	1.48634	NA	0.284116	0.08	0.113823	0.0377397	2.12765	NA	-0.364039	0.02	-0.180239	0.00546	-2.19775	NA	-0.0115382	0.94	-0.26069	0.00546	0.742445	NA	Dino-Group-I-Clade-5_X
ASV1085	parasites	-0.252081	0.12	-0.0788325	0.584421	-1.92706	NA	-0.241009	0.14	-0.0327875	0.106745	-1.69406	NA	-0.19116	0.24	-0.347363	0.151762	-1.24242	NA	-0.210742	0.2	-0.259095	0.0377397	-1.1581	NA	0.248769	0.13	-0.188968	0.476858	1.15124	NA	0.301832	0.06	0.267025	0.274944	1.59194	NA	0.301985	0.06	0.320904	0.61116	1.32127	NA	Dino-Group-II-Clade-7_X	Eastern North Pacific	NCBI; JX842574.1;KJ762258.1
ASV125	other heterotrophs-MAST	-0.117396	0.48	0.162681	0.414848	-2.31462	0.0902108	0.373256	0.02	0.165457	0.400753	-1.18845	0.546774	-0.113161	0.49	-0.0461363	0.13861	-1.57527	0.41904	-0.18433	0.26	-0.11544	0.263299	-3.19324	0.0141219	-0.330784	0.04	-0.140588	0.169703	-1.83186	0.269243	0.279043	0.09	0.135483	0.333646	2.46844	0.052961	0.238206	0.14	0.0192536	0.34125	3.5155	0.00548041	MAST-9C	mostly found in temperature region	https://doi.org/10.1093/femsec/fiae130
ASV773	nekton	-0.218504	0.18	-0.0456616	0.273195	-2.72207	0.204257	0.132991	0.42	-0.0820273	0.264302	1.39069	0.625319	0.251446	0.12	0.290584	0.0822525	1.32676	0.707229	0.048184	0.77	0.268972	0.172407	0.463244	0.858052	0.24665	0.13	0.232521	0.113721	2.69376	0.234179	-0.106229	0.52	-0.287846	0.218874	-0.636317	NA	-0.110995	0.5	-0.253387	0.224561	-0.829204	0.865941	Teleostei_XX
ASV683	unassigned	0.116508	0.48	-0.0369733	0.0181137	-1.72198	NA	0.00211876	0.99	-0.090427	0.0396062	-1.80613	NA	0.182158	0.27	0.422591	0.00546	1.23091	NA	0.220273	0.18	0.377389	0.053413	1.6699	NA	0.0680271	0.68	0.318521	0.150814	2.06654	NA	-0.316658	0.05	-0.401609	0.239959	-1.66072	NA	-0.145164	0.38	-0.372469	0.253673	-1.39021	NA	unassigned
ASV677	microzooplankton	-0.0865956	0.6	0.00704909	0.633665	-0.351407	0.918148	0.202504	0.22	-0.026591	0.719993	1.46479	NA	0.385372	0.02	0.261387	0.723603	1.39409	0.67769	0.22839	0.16	0.219428	0.453049	1.02923	NA	0.218757	0.18	0.177061	0.541565	1.44946	0.621378	-0.252008	0.12	-0.231127	0.501593	-0.482861	NA	-0.225641	0.17	-0.234422	0.510224	-0.919242	NA	Acanthoplegma	North Atlantic	OBIS/NCBI
ASV112	other heterotrophs-sulcozoa	0.0909229	0.58	0.139621	0.703196	-3.03808	0.135347	0.209953	0.2	0.127724	0.505853	12.3841	7.11044e-15	0.0169142	0.92	0.0718008	0.893428	-2.59901	0.324148	0.059581	0.72	-0.00415547	0.983544	-7.78742	3.69369e-06	-0.0902971	0.58	-0.0431966	0.622446	0.815255	0.792159	0.206814	0.21	0.0160415	0.751397	3.1272	0.119908	0.0398069	0.81	-0.0829757	0.464579	4.70417	0.0119895	Amastigomonas	atlantic*, svalbard	OBIS/NCBI; KY077717.1
ASV737	zoobenthos	-0.269028	0.1	0.0240375	0.202682	-1.91531	NA	0.0879286	0.59	0.0279987	0.211117	-0.287097	NA	0.201751	0.22	-0.0345217	0.224561	-0.103252	NA	0.109607	0.51	-0.0406642	0.193582	-0.632445	NA	0.331881	0.04	-0.0400382	0.193582	2.5803	NA	-0.00476576	0.98	0.0449477	0.151762	1.37511	NA	-0.0450328	0.79	0.0275907	0.224824	1.24428	NA	Axinulus	Arctic, north atlatic	OBIS
ASV119	zoobenthos	0.146991	0.37	-0.00895881	0.819	-1.88065	0.276434	0.132483	0.42	-0.0612418	0.843791	-0.617806	NA	0.241098	0.14	0.409242	0.783214	-0.336602	0.979068	0.260211	0.11	0.352904	0.848758	5.26312	4.81031e-05	-0.153804	0.35	0.290552	0.827787	2.00988	0.252712	-0.223548	0.17	-0.373415	0.359344	-4.05001	0.0033354	-0.268312	0.1	-0.364326	0.723603	-5.2601	1.92255e-05	Barantolla	north pacific; east atlantic	OBIS/NCBI
ASV784	zoobenthos	-0.218699	0.18	0.0625821	0.150814	-1.81052	NA	0.0995733	0.55	0.0289136	0.208991	0.725346	NA	0.372606	0.02	0.253252	0.0958162	0.998464	NA	0.166703	0.31	0.186509	0	0.0142068	NA	0.243625	0.14	0.134364	0.00546	0.992068	0.701234	-0.088197	0.59	-0.19173	0.526335	-0.0883557	NA	-0.0757546	0.65	-0.234651	0.190933	-0.238546	NA	Bylgides	high richness found in North atlantic, recorded in svalbard	OBIS/NCBI
ASV57	mesozooplankton	-0.285891	0.08	0.0356305	0.837428	-0.956497	0.343499	-0.102817	0.53	0.000925542	0.859434	-1.30191	0.197092	0.269638	0.1	0.265393	0.797827	0.775274	0.538448	0.163889	0.32	0.209466	0.836843	1.39767	0.116368	0.103924	0.53	0.160783	0.806564	2.05112	0.00536172	-0.00222884	0.99	-0.218223	0.374657	-1.15165	0.224729	-0.123738	0.45	-0.241858	0.732532	-0.534482	0.816961	Calanus	Arctic, north atlatic	OBIS/NCBI
ASV135	other heterotrophs-Cercozoan	0.0649835	0.69	0.329767	0	0.96436	0.668183	0.0760447	0.65	0.32528	0	0.520061	0.847614	-0.0266793	0.87	-0.0146181	0.0216667	0.137886	0.979068	0.0972453	0.56	-0.166773	0.0396062	0.090384	0.943423	-0.175017	0.29	-0.230115	0.0377397	-1.38981	0.5323	0.224909	0.17	0.203636	0	1.68224	0.339358	0.0134899	0.94	-0.0314484	0	-0.928647	0.816961	CCW10-lineage_X	Svalbard, Arctic	(EU050976.1 NCBI)
ASV47	other heterotrophs-Cercozoan	-0.0852037	0.61	0.161419	0.481605	-0.424107	0.868163	0.0738758	0.65	0.183938	0.516203	-0.316988	0.882086	-0.179358	0.27	-0.199979	0.629571	-0.617419	0.940475	-0.202559	0.22	-0.245938	0.263299	-0.036001	0.975153	-0.0645086	0.7	-0.246725	0.574668	0.107688	0.954562	0.279324	0.09	0.273183	0.375667	0.190714	0.929157	0.243576	0.14	0.156836	0.401471	0.52952	NA	Cercozoa_XXX	atlanitc*	KC787460.1 found n anoxix black sea
ASV126	phytoplankton	-0.386326	0.02	-0.0094861	0.263299	-2.94413	0.0297717	-0.0948313	0.57	-0.0242298	0.263299	-1.46144	NA	0.098309	0.55	0.116453	0.237968	0.649181	0.871541	0.239704	0.14	0.103668	0.224824	1.83927	0.236521	0.043933	0.79	0.0873055	0.224824	2.4679	0.0658857	-0.0311121	0.85	-0.110265	0.250739	-1.37682	0.420206	0.0921715	0.58	-0.102735	0.277075	-0.39686	0.871287	Chaetoceros	globaly widespread/ arctic cold water	OBIS/NCBI KC771205.1; HM581775.1
ASV367	other heterotrophs-Cercozoan	-0.0405597	0.81	0.00705887	0.304652	-1.65087	0.508725	-0.0534497	0.75	0.00292377	0.294	-1.65425	0.546774	-0.0203739	0.9	0.0311983	0.100025	0.971428	0.851935	0.0937921	0.57	0.0232806	0.183152	2.39009	0.34403	0.0642618	0.7	0.0169864	0.133489	4.35895	0.0209425	0.247178	0.13	-0.0239952	0.247087	-1.74446	0.445111	0.0753831	0.65	-0.028819	0.250739	-0.732825	0.865941	Cryomonadida_XX	norway	EF527114.1
ASV128	other heterotrophs-Cercozoan	-0.146909	0.37	0.0989657	0.21709	-0.85627	0.565463	0.104129	0.53	0.0536643	0.172909	-0.278205	0.87184	0.226925	0.16	0.338532	0.338299	0.139394	0.979068	0.340882	0.03	0.242149	0.313688	1.93863	0.0977906	0.0875622	0.6	0.169398	0.304652	0.930968	0.535197	0.0481323	0.77	-0.24745	0.165846	-0.715451	0.634153	-0.197851	0.23	-0.315733	0.163528	-0.496116	0.865941	Cryothecomonas	subarctic Pacific Ocean; europe	NCBI
ASV220	other heterotrophs-Cercozoan	-0.0105724	0.95	-0.0705891	0.110929	-4.26732	0.0297717	-0.144199	0.38	-0.127967	0.108983	-3.16779	0.178256	0.143578	0.38	0.458266	0.151762	1.77125	0.538448	0.118778	0.47	0.423518	0.172407	3.40226	0.067442	0.275024	0.09	0.36575	0.150814	4.33213	0.0095465	-0.236222	0.15	-0.453127	0.053413	-2.55941	0.123437	-0.061345	0.71	-0.399797	0.12406	-1.52665	NA	Cryothecomonas	Bering Sea	NCBI;KC771151.1
ASV377	other heterotrophs-Cercozoan	-0.0742782	0.65	0.114711	0.752915	-0.689459	0.797749	0.227646	0.16	0.152492	0.150814	0.289323	0.910447	-0.423993	0.01	-0.312016	0.112265	-2.23403	0.321173	-0.374511	0.02	-0.319547	0.0466098	-1.55712	0.506304	-0.295065	0.07	-0.293479	0.372632	-0.635377	0.858327	0.340042	0.03	0.347016	0.210934	2.35009	NA	0.488225	0	0.263212	0.788248	2.86968	0.0997959	Cryothecomonas	arctic, antarcitc	DQ507408.1; DQ314811.1
ASV465	parasites	-0.211017	0.2	-0.131556	0.00546	-3.15431	0.0726203	-0.0941627	0.57	-0.141799	0.00546	-0.480498	0.865564	0.164735	0.32	0.0997109	0	0.282584	0.979068	0.027723	0.87	0.146525	0.0181137	0.905087	0.720985	0.394048	0.01	0.157082	0.0147	3.31704	0.0570913	-0.21567	0.19	-0.165711	0.00546	-0.802476	0.744161	-0.13708	0.41	-0.0713071	0.00546	-0.0296708	0.995677	Dino-Group-I-Clade-1_X	Eastern North Pacific	NCBI; KJ763301.1
ASV415	parasites	0.0585523	0.72	0.0155456	0.638475	-3.61307	0.0739892	0.11495	0.49	-0.00811206	0.696787	-3.23735	0.178256	0.148718	0.37	0.182229	0.808822	3.28918	0.146858	0.258218	0.11	0.148002	0.35879	3.54716	0.00918514	0.0860737	0.6	0.116349	0.752043	2.37058	0.0986173	0.0289247	0.86	-0.154992	0.48663	-3.69385	0.0176229	-0.185055	0.26	-0.164865	0.519913	-3.00945	NA	Dino-Group-I-Clade-3_X
ASV590	parasites	0.0803505	0.63	0.307808	0.00546	0.606593	NA	0.136893	0.41	0.307724	0.00546	1.00596	NA	-0.104176	0.53	-0.0456676	0.00546	-1.11468	NA	-0.231405	0.16	-0.182954	0	-0.646214	NA	-0.306225	0.06	-0.23706	0.0216667	-0.529694	NA	0.463218	0	0.21889	0.00546	1.86779	NA	0.17692	0.28	-0.000751283	0.00546	0.225861	NA	Dino-Group-I-Clade-4_X	East China Sea	NCBI; KP685290.1
ASV69	parasites	-0.105731	0.52	0.25985	0.218227	-0.125194	0.961265	0.175114	0.29	0.274442	0.202094	1.50163	0.365734	-0.0738803	0.65	-0.152952	0.798439	-0.59493	0.851935	-0.0650916	0.69	-0.251927	0.27084	-0.740827	0.666765	-0.306794	0.06	-0.279675	0.78595	-0.455955	0.820079	0.341866	0.03	0.287724	0.301946	1.82254	0.122134	0.183526	0.26	0.101547	0.286852	0.655398	0.843318	Dino-Group-II_XX
ASV283	parasites	0.17171	0.3	0.270477	0.220154	1.54359	0.539033	0.460601	0	0.235803	0.133489	2.0713	0.476793	0.170212	0.3	0.229807	0.259	1.56817	0.62916	0.123863	0.45	0.0692458	0	-0.570982	0.836433	-0.163319	0.32	-0.0206019	0	0.0835925	NA	0.0135891	0.93	-0.0505486	0.113721	-1.57908	NA	-0.0273662	0.87	-0.241767	0.13008	-1.16955	0.816961	Dino-Group-II-Clade-15_X
ASV922	microzooplankton	0.500557	0	0.133532	0.102235	2.37338	NA	0.126895	0.44	0.12891	0.102235	-2.00093	NA	0.0622749	0.71	0.0159605	0.220154	0.354719	NA	-0.0695753	0.67	-0.0488871	0.193582	-1.09252	NA	-0.306225	0.06	-0.0779652	0.172407	-0.56011	NA	0.122628	0.46	0.0627699	0.0216667	-1.60714	NA	-0.0446145	0.79	-0.0322773	0.108983	-1.55802	NA	Ensiculifera	north atlatic	OBIS
ASV29	phytoplankton	-0.255508	0.12	0.137715	0.163528	-1.11946	0.0494106	-0.0778076	0.64	0.108008	0.0958162	-0.73061	0.365734	0.337672	0.04	0.211037	0.193266	0.520467	0.540575	0.253292	0.12	0.115379	0.00546	0.895319	0.135683	0.180634	0.27	0.0548964	0.0216667	0.874291	0.139172	-0.0216742	0.9	-0.110346	0.0583511	-0.740221	0.226694	-0.12089	0.46	-0.207085	0.0938079	-0.456788	0.722302	Gymnodinium	globaly widespread/ arctic cold water	OBIS/NCBI
ASV472	mixoplankton	-0.254058	0.12	0.14355	0.115298	0.345785	0.894226	0.101781	0.54	0.136679	0.140975	0.876231	0.698545	0.332265	0.04	0.0319978	0.118831	1.48706	0.5154	0.178945	0.28	-0.0399098	0.180415	0.844795	0.70337	-0.167543	0.31	-0.073495	0.151762	-0.611228	0.820079	0.0648623	0.69	0.054126	0.182083	1.16459	NA	-0.116962	0.48	-0.0479538	0.150814	-1.04821	NA	Heterocapsa	Arctic, north atlatic	OBIS/NCBI
ASV22	microzooplankton	0.0799025	0.63	0.422941	0	2.81449	0.0658808	0.26673	0.1	0.394737	0	1.95016	0.509237	0.160219	0.33	0.156388	0.00546	-1.90884	0.5154	0.202523	0.22	-0.0646605	0.00546	-1.0819	0.70096	-0.0558205	0.74	-0.173347	0	0.958275	0.704369	0.0685628	0.68	0.103582	0	2.44216	0.145396	-0.0836661	0.61	-0.196766	0	-0.117216	0.987336	Islandinium	Arctic, north atlatic	OBIS/NCBI
ASV912	parasites	-0.221132	0.18	-0.126005	0.202682	-2.37507	NA	-0.0582795	0.72	-0.118167	0.221132	-0.813318	NA	0.13755	0.4	-0.0421866	0.217574	-0.265034	NA	0.0304435	0.85	0.0230177	0.211476	-0.500753	NA	0.404647	0.01	0.0547077	0.211476	2.09891	0.404743	-0.0611092	0.71	-0.0348235	0.224824	0.578608	NA	-0.0426228	0.8	0.0546867	0.231725	0.623005	NA	Lankesteria	north atlatic	OBIS
ASV163	other heterotrophs-Cercozoan	0.153206	0.35	0.115691	0.049	-0.099719	0.965593	0.170742	0.3	0.072905	0.049	-0.34994	0.878971	0.213864	0.19	0.316393	0.00546	0.366609	0.979068	0.07946	0.63	0.215458	0	0.935151	0.666765	0.119351	0.47	0.142848	0	2.38854	0.224945	-0.140998	0.39	-0.217868	0.0377397	-1.14517	0.556777	-0.118826	0.47	-0.298216	0.0377397	-0.385774	NA	Novel-clade-2_X
ASV150	other heterotrophs-Cercozoan	-0.102034	0.54	0.071237	0.139555	3.23023	0.02666	-0.0437199	0.79	0.0762074	0.115298	-0.59871	0.808631	-0.166283	0.31	-0.0494982	0.0510802	-2.16743	0.23535	-0.101399	0.54	-0.0755128	0.0181137	-2.17936	0.193987	0.171241	0.3	-0.0819339	0.0216667	4.98688	8.86049e-05	0.0375159	0.82	0.0856874	0.150814	-1.35903	0.442556	0.218272	0.18	0.0345977	0.207752	-0.565077	0.865941	Novel-clade-2_X
ASV326	phytoplankton	0.333269	0.04	0.260032	0.445739	1.48742	0.457356	0.322971	0.04	0.257305	0.503328	1.79279	0.498905	0.0848592	0.61	-0.0178585	0.505853	0.189341	0.979068	-0.12524	0.45	-0.136901	0.318718	-1.57079	0.502942	-0.274169	0.09	-0.185856	0.391904	-0.289536	0.933623	0.185904	0.26	0.16627	0.713656	1.11974	NA	-0.0138477	0.93	-0.0191425	0.723488	-0.544386	0.871287	Nusuttodinium	Arctic, north atlatic	OBIS/NCBI
ASV107	other heterotrophs-Labyrinthulean	0.0375659	0.82	0.377721	0.0396062	1.3589	0.276434	0.317872	0.05	0.344113	0.0339901	1.50834	0.345385	0.0993372	0.55	0.205357	0	1.24932	0.467856	0.0391782	0.81	-0.00177393	0	-0.327985	0.836433	-0.218056	0.18	-0.109135	0	-0.078752	0.954562	0.130254	0.43	0.0333993	0.0246051	-0.477174	0.751748	0.0400672	0.81	-0.234402	0.0339901	-1.08363	0.61599	Oblongichytrium	north atlanitc	OBIS
ASV813	other heterotrophs-Labyrinthulean	-0.163777	0.32	-0.0976496	0.211476	-4.06919	0.0409883	-0.0223027	0.89	-0.0785193	0.241222	-4.72901	0.0202125	-0.0788047	0.63	-0.134552	0.235222	-2.69396	0.310807	-0.144916	0.38	-0.0689554	0.221132	-2.82661	0.215679	0.150013	0.36	-0.0284336	0.220154	-1.73216	0.5323	0.12801	0.44	0.0646668	0.25301	3.32384	0.0673736	0.13692	0.41	0.133361	0.25945	4.80257	0.0101249	Oblongichytrium	north atlanitc	OBIS
ASV432	zoobenthos	-0.0303717	0.85	0.019509	0.00546	-1.05519	0.706355	0.0826739	0.62	0.019943	0.00546	0.604822	0.855352	-0.0472828	0.78	-0.00632152	0.00546	0.135866	0.979068	-0.0780319	0.64	-0.0145159	0	0.274967	0.913354	0.0293414	0.86	-0.0174081	0	3.55617	0.0814909	-0.0784203	0.64	0.0169571	0.0754342	-0.589274	0.825548	0.180766	0.27	0.00301346	0.00546	0.388636	0.902444	Ophelina	atalatic	OBIS
ASV800	zoobenthos	-0.155126	0.35	-0.120341	0	-2.4015	0.276434	-0.0857502	0.6	-0.129672	0	-0.207184	NA	0.0422854	0.8	0.0909061	0	0.172704	0.979068	0.0641937	0.7	0.133775	0.00546	0.441898	NA	0.389497	0.01	0.14348	0	2.32213	0.335342	-0.129163	0.43	-0.15131	0	-0.592942	NA	-0.159997	0.33	-0.0649562	0	0.0120551	NA	Ophiura	iceland	NCBI; KJ620539.1
ASV288	other heterotrophs-Cercozoan	-0.337024	0.04	0.171125	0.386691	-1.12283	0.315782	0.116967	0.48	0.193007	0.401926	0.678479	0.656031	-0.123751	0.45	-0.196471	0.372632	-0.69435	0.69599	-0.15728	0.34	-0.247491	0.287793	-1.18855	0.370533	-0.0996276	0.55	-0.250759	0.335559	-0.197036	0.922663	0.392158	0.01	0.275633	0.237238	1.60006	0.109272	0.284928	0.08	0.152393	0.289667	1.61381	0.13677	Phagomyxa	north atlanitc, svalbard	OBIS
ASV40	parasites	-0.00813768	0.96	0.395324	0.827787	0.868926	0.602854	0.192631	0.24	0.395541	0.167959	1.13178	0.509237	0.0645052	0.7	-0.0611845	0.106745	-0.0871182	0.979068	-0.0299516	0.86	-0.237129	0.0657979	-0.749826	0.666765	-0.316873	0.05	-0.306222	0.335559	-0.900127	0.624677	0.329012	0.04	0.283404	0.202094	0.645549	0.717235	0.131907	0.42	0.00129715	0.853125	0.0516087	0.992309	Pirsonia	North Atlantic	OBIS/NCBI
ASV540	phytoplankton	0.0351774	0.83	0.198509	0.149162	1.44241	NA	0.104977	0.52	0.204048	0.132119	0.759863	NA	-0.210274	0.2	-0.0730914	0.0583511	-0.912279	NA	-0.189122	0.25	-0.155174	0.0216667	0.115478	NA	-0.157038	0.34	-0.183229	0.0246051	-0.364862	NA	0.312143	0.05	0.180432	0.150814	1.48881	NA	0.173458	0.29	0.0384946	0.210934	-0.21627	NA	Prasinoderma	globaly widespread	OBIS/NCBI
ASV194	other heterotrophs-Cercozoan	0.356263	0.03	0.408266	0.163528	0.855129	0.736267	0.373103	0.02	0.39041	0.167959	1.95748	0.461344	-0.0976802	0.55	0.077867	0.163528	-2.41981	0.310807	-0.0483541	0.77	-0.124701	0.224824	-1.4426	0.573699	-0.251088	0.12	-0.218161	0.24833	-1.04564	0.704369	0.0986474	0.55	0.165759	0.13861	0.892527	0.72043	0.1803	0.27	-0.12465	0.13861	1.46217	0.679814	Protaspa
ASV159	other heterotrophs-Cercozoan	-0.0267765	0.87	0.235451	0.162145	0.685057	0.7921	0.193374	0.24	0.243116	0.149798	1.139	0.637568	-0.0857668	0.6	-0.0952311	0.182083	-0.546225	0.979068	-0.225221	0.17	-0.191327	0.264302	-2.02038	0.34403	0.114237	0.49	-0.223264	0.185601	0.717179	0.820079	0.428834	0.01	0.221693	0.06825	2.43704	0.128896	0.191143	0.24	0.053284	0.13861	0.963838	0.820727	Protaspa	North Atlantic	OBIS/NCBI
ASV371	other heterotrophs-Cercozoan	0.289877	0.07	0.334344	0.135004	2.404	0.243226	0.183036	0.26	0.325161	0.113721	1.90072	0.509237	0.0134545	0.94	0.0213279	0.0510802	-0.235946	0.979068	-0.169133	0.3	-0.138285	0.0181137	-1.54522	0.573699	-0.306225	0.06	-0.208172	0.0216667	-0.498217	NA	0.358657	0.02	0.173935	0.145306	2.32144	NA	0.049999	0.76	-0.064173	0.202682	-1.2193	0.816961	Protaspa-lineage_X
ASV60	other heterotrophs-Cercozoan	0.292909	0.07	0.465007	0.120796	2.54927	0.109037	0.405673	0.01	0.450089	0	8.57787	6.88553e-11	0.0457775	0.78	0.0464019	0.1568	-5.6496	0.00187689	-0.00934846	0.95	-0.178064	0.195873	-4.14672	0.0414845	-0.229255	0.16	-0.277886	0.146831	-1.10547	0.702757	0.238881	0.14	0.226847	0.658282	3.87413	0.00962788	0.0941818	0.57	-0.104203	0.049	2.75103	0.247416	Protaspa-lineage_X
ASV129	other heterotrophs-Cercozoan	0.212921	0.19	0.362443	0.0377397	-0.350729	0.892966	0.119146	0.47	0.346218	0.0799697	-1.34319	0.509237	0.247877	0.13	0.072035	0	3.3155	0.0159644	0.223846	0.17	-0.108227	0.0216667	1.67384	0.299875	-0.14016	0.39	-0.191653	0.106745	1.50825	0.306162	0.0959565	0.56	0.144539	0.185601	-1.14176	0.508199	-0.128089	0.44	-0.113257	0.193582	-3.4204	NA	Protaspa-lineage_X	found in arctic**	NCBI; GU297898.1
ASV313	other heterotrophs-Cercozoan	-0.207303	0.21	0.155753	0.181336	-1.20029	0.466948	0.397022	0.01	0.168424	0.169	2.25443	0.159885	-0.0279266	0.87	-0.122292	0.297887	-0.758314	0.7976	-0.0480721	0.77	-0.17709	0.256388	-1.39772	0.439687	-0.243947	0.13	-0.188924	0.25945	-0.619869	0.768745	0.308085	0.06	0.200007	0.286852	2.53519	0.0477984	0.175299	0.29	0.0882109	0.18438	1.5001	0.442281	Protaspa-lineage_X	baltic sea	NCBI;FN690377.1
ASV93	other heterotrophs-Cercozoan	0.188084	0.25	0.0602787	0.47775	2.90017	0.077756	0.335061	0.04	0.0554994	0.399775	2.9174	0.265029	0.118778	0.47	0.0282148	0.723488	-1.92851	0.5154	0.0912305	0.58	-0.00416612	0.902163	-1.95572	0.473276	-0.0210505	0.9	-0.0205851	0.70565	-0.169442	0.952917	-0.0849233	0.61	0.00943052	0.288935	-3.79475	0.017093	-0.0640118	0.7	-0.0333367	0.379694	-1.69066	0.597673	Protaspa-lineage_X	atlantic, east china sea	NCBI;KC488582.1;KM067446.1
ASV451	other heterotrophs-Cercozoan	0.0733482	0.66	0.243699	0.752915	0.38925	0.894226	0.257013	0.11	0.255705	0.828378	0.51343	0.865564	-0.00128951	0.99	-0.13034	0.816309	-0.61001	0.979068	0.039328	0.81	-0.225103	0.907345	-0.710616	0.780468	-0.0175017	0.92	-0.25318	0.669124	0.309455	0.929205	0.277244	0.09	0.258049	0.916025	1.96426	NA	0.0296737	0.86	0.0835306	0.873103	0.730386	0.865941	Protaspa-lineage_X	baltic sea, mid-atlantic	NCBI;DQ455725.1; FN690372.1
ASV105	microzooplankton	0.180807	0.27	0.0324167	0.053413	-1.42513	0.57822	-0.191268	0.24	0.0426538	0.0510802	-2.0099	0.506731	-0.106334	0.52	-0.0847447	0.115298	-3.49105	0.0834123	-0.104615	0.53	-0.0873799	0.14238	-3.22604	0.0499814	0.0210791	0.9	-0.0805509	0.108983	-3.65805	0.0658857	0.0327024	0.84	0.094979	0.0216667	3.72592	0.00956117	-0.0363544	0.83	0.071319	0.0608968	3.70499	0.0657482	Pteridomonas	north atlantic	OBIS/NCBI
ASV285	phytoplankton	0.261799	0.11	0.193317	0.00546	0.86668	0.701091	0.360997	0.02	0.172775	0.00546	1.24266	0.580865	0.199951	0.22	0.131168	0.00546	0.907564	0.7976	0.0926556	0.57	0.0213039	0.983544	-1.15015	0.634544	-0.326288	0.04	-0.0377282	0.0510802	-1.13636	0.625704	-0.0255318	0.88	-0.00636201	0.0147	0.00704054	0.995333	-0.014638	0.93	-0.14325	0.0359887	0.0597184	0.992309	Pyramimonas	Arctic, north atlatic	OBIS/NCBI
ASV131	microzooplankton	-0.0718838	0.66	-0.0146339	0.0282215	-2.45643	0.152207	0.0835226	0.61	-0.0230584	0.0417529	-2.04688	NA	0.0651336	0.69	0.0679274	0	2.00372	0.384332	-0.00674256	0.97	0.0647285	0.0466098	2.46099	0.163461	0.0276846	0.87	0.0569958	0.149162	3.30296	0.0346905	0.0944007	0.57	-0.0695748	0.224824	-2.6944	0.119908	-0.061004	0.71	-0.0586978	0.237968	-2.12054	0.35979	RAD-C_Xb_X
ASV553	other heterotrophs-Cercozoan	0.256181	0.12	0.288682	0.0216667	2.02731	NA	0.372901	0.02	0.275406	0.00546	1.47636	NA	0.0753461	0.65	0.0601292	0.00546	1.18042	NA	0.0819128	0.62	-0.0838549	0.864158	-0.872966	NA	-0.261719	0.11	-0.150735	0.0799697	-0.362976	NA	0.176757	0.28	0.112645	0.0246051	1.4261	NA	-0.0493066	0.77	-0.0926679	0.0396062	-1.31064	NA	Reckertia	cold water; antarctic	OBIS/NCBI
ASV910	mesozooplankton	0.225097	0.17	0.275611	0.17519	0.988287	NA	0.407217	0.01	0.254435	0.187186	1.15506	NA	0.172986	0.29	0.123732	0.205604	0.703813	NA	0.0914857	0.58	-0.0235425	0.172407	-0.620917	NA	-0.306225	0.06	-0.0977884	0.172407	-0.405309	NA	-0.0138389	0.93	0.0478645	0.149798	0.634939	NA	-0.0226919	0.89	-0.147714	0.206853	-0.79108	NA	Sagitta	Arctic, north atlatic	OBIS/NCBI
ASV271	microzooplankton	0.0235996	0.89	0.242942	0.0181137	0.814877	0.736667	0.136633	0.41	0.212861	0	1.96478	NA	0.274696	0.09	0.198125	0.0147	0.243858	0.979068	0.28164	0.08	0.0551346	0.0417529	-0.138785	0.937395	0.157655	0.34	-0.0242677	0.0510802	1.27912	0.652744	-0.283091	0.08	-0.0379453	0	0.388442	0.873438	-0.189327	0.25	-0.209753	0.0147	-0.722325	0.865941	Strombidium	north atlanitc; cold water	OBIS/NCBI
ASV41	other heterotrophs-Cercozoan	0.434019	0.01	0.249358	0.629951	6.08631	8.63236e-07	0.205415	0.21	0.243263	0.540241	1.15421	0.61111	-0.0147272	0.93	0.0100236	0.540241	-5.40885	4.44468e-05	-0.172638	0.29	-0.108148	0.865281	-1.64326	0.428346	-0.166342	0.31	-0.159348	0.526335	4.07494	0.00536172	0.18374	0.26	0.135017	0.411695	-2.51606	0.119908	-0.0923629	0.58	-0.0426064	0.505853	-5.00797	0.000251391	TAGIRI1-lineage_X	sagami bay, cold seep	NCBI;AB275053.1
ASV240	other heterotrophs-Cercozoan	0.203982	0.21	0.401389	0.00546	1.43877	0.394933	0.269654	0.1	0.36817	0	1.22206	0.55962	0.193198	0.24	0.198756	0.00546	0.170875	0.979068	0.00205665	0.99	-0.0184737	0.0339901	-0.683023	0.742572	-0.00346404	0.98	-0.129511	0.00546	0.330674	0.922663	0.127244	0.44	0.0530097	0.00546	0.800618	NA	-0.0421848	0.8	-0.2317	0	-0.326679	0.89299	TAGIRI1-lineage_X	sagami bay, cold seep	NCBI;AB275053.1
ASV481	other heterotrophs-Cercozoan	-0.104571	0.53	0.0235844	0.0396062	2.14991	0.341951	0.057295	0.73	0.0379798	0.0377397	-1.92546	0.509237	-0.172601	0.29	-0.115858	0	-3.19178	0.155678	-0.143763	0.38	-0.109758	0	-2.24824	0.383594	0.0584762	0.72	-0.0962952	0	6.58579	0.00012487	0.119168	0.47	0.117873	0.0282215	-0.849571	0.747736	0.179227	0.27	0.100301	0.0377397	-1.75069	0.649398	TAGIRI1-lineage_X	sagami bay, cold seep	NCBI;AB275053.1
ASV255	other heterotrophs-Telonemea	0.107335	0.52	-0.00682418	0.827787	-2.63549	0.224281	0.157311	0.34	-0.0496708	0.621691	-0.43703	0.878971	0.100644	0.54	0.335301	0.939886	1.63785	0.597575	0.227779	0.16	0.288901	0.864158	1.91149	0.474966	-0.0251948	0.88	0.237712	0.743048	3.80851	0.0577587	-0.21213	0.19	-0.30565	0.887031	-1.13536	NA	-0.0564286	0.73	-0.29857	0.573414	-1.44157	NA	Telonema	Widely spread	OBIS
ASV387	other heterotrophs-Cercozoan	0.26335	0.11	0.286269	0.0396062	2.83047	0.137658	-0.0223027	0.89	0.276053	0.0377397	-0.965762	0.744394	0.103407	0.53	0.0366256	0.0466098	-1.89382	0.5154	0.0665001	0.69	-0.102753	0.10759	-1.60625	0.573699	-0.205803	0.21	-0.165469	0.06825	-0.357507	NA	0.118399	0.47	0.132401	0	-0.694144	0.787496	-0.0484606	0.77	-0.0713488	0	-1.77345	0.646146	Thaumatomastix	Widely spread	OBIS
ASV249	unassigned	0.0759293	0.65	-0.0459487	0.187186	-2.79278	0.191019	0.228026	0.16	-0.108887	0.154145	-0.554674	0.865564	0.282736	0.08	0.497938	0.151762	2.15443	0.467856	0.22487	0.17	0.445791	0.154145	2.99827	0.152834	0.125424	0.45	0.376901	0.163528	3.19703	0.0975984	-0.349239	0.03	-0.474591	0.169703	-2.78353	NA	-0.227496	0.16	-0.438557	0.160865	-2.21481	NA	unassigned
ASV592	unassigned	0.0990113	0.55	-0.0222238	0.139555	3.38775	0.0902108	0.117107	0.48	-0.0313691	0.139555	-1.89296	0.509237	0.289995	0.07	0.0746934	0.278998	7.41167	1.07356e-05	-0.0166454	0.92	0.0740455	0.231725	-2.90462	0.203389	0.121618	0.46	0.066763	0.211476	-1.22716	0.682137	-0.0516909	0.75	-0.080047	0.049	3.50423	0.0777292	-0.169615	0.3	-0.0637169	0.149162	-8.44688	3.90073e-07	unassigned
ASV1266	unassigned	0.338216	0.04	0.316801	0	1.36557	NA	0.333683	0.04	0.291659	0	0.9689	NA	0.0843263	0.61	0.148474	0.0106462	0.644107	NA	-0.0900165	0.59	-0.0217355	0.0339901	-0.628984	NA	-0.261719	0.11	-0.108057	0.0339901	-0.152007	NA	0.0271596	0.87	0.0493941	0	0.36532	NA	0.0199418	0.9	-0.175372	0	-0.845219	NA	unassigned
ASV890	unassigned	-0.127269	0.44	-0.0547532	0.475367	-1.99924	0.387691	-0.0793127	0.63	-0.0164167	0.696787	-0.799502	NA	-0.14215	0.39	-0.290848	0.468488	-1.41556	0.67769	-0.267202	0.1	-0.222208	0.808822	-1.64491	NA	-0.0782921	0.64	-0.165729	0.732532	-0.0844444	NA	0.356361	0.03	0.230082	0.0938079	2.25985	NA	0.225495	0.17	0.267175	0.260654	1.99659	NA	unassigned
ASV297	phytoplankton	0.320027	0.05	0.266974	0.0417529	2.46516	0.11972	0.21904	0.18	0.237348	0.0359887	1.3929	0.542633	0.131729	0.42	0.190953	0.0704646	1.53637	0.527977	-0.0324283	0.84	0.0377775	0.163528	-0.122598	0.939603	-0.0789827	0.63	-0.045284	0.14238	0.439839	0.8769	-0.089541	0.59	-0.0176104	0.0319165	-1.77152	NA	-0.109112	0.51	-0.20659	0.0339901	-1.49514	0.644823	Gymnodinium	globaly widespread/ arctic cold water	OBIS/NCBI
ASV78	zoobenthos	0.121079	0.46	0.420386	0.112265	1.47175	0.363557	0.310014	0.05	0.402769	0.13617	3.85139	0.00307529	0.10445	0.53	0.0741803	0.115298	2.60832	0.0971968	-0.0685746	0.68	-0.133514	0.173727	-2.87832	0.0499814	-0.252647	0.12	-0.228808	0.146831	-0.891269	0.682152	0.324427	0.04	0.176078	0.178714	0.769231	0.703131	0.1301	0.43	-0.122993	0.143934	-1.14264	0.710126	Phyllochaetopterus	North Atlantic	OBIS/NCBI
ASV32	microzooplankton	0.108765	0.51	0.300072	0.351522	5.30052	9.71886e-08	0.226933	0.16	0.285339	0.278038	-0.600579	0.771338	0.0578314	0.73	0.0697805	0.510769	-2.95087	0.0159644	-0.000108802	1	-0.0809609	0.483677	-2.27437	0.0867999	-0.112118	0.5	-0.15162	0.475367	6.78829	4.99446e-12	0.0435232	0.79	0.11054	0.271239	-3.19145	0.00684874	0.0473554	0.77	-0.102826	0.264918	-2.30137	0.092883	Actinomonas	north atlantic	OBIS/NCBI
ASV476	other heterotrophs-sulcozoa	0.105917	0.52	0.116548	0.176318	-0.458115	0.894226	0.340591	0.03	0.101636	0.204693	2.09921	0.498905	-0.0672502	0.68	0.098799	0.201329	-1.73282	0.543596	-0.128669	0.44	0.0296467	0.190258	-1.62841	0.573699	-0.210913	0.2	-0.00903333	0.188385	0	NA	-0.0868428	0.6	-0.0215794	0.211117	0.507614	NA	0.203442	0.21	-0.103977	0.211476	1.97591	0.562484	Amastigomonas	north atlatic	NCBI JF972007., EU087189.1
ASV534	parasites	0.0501628	0.76	0.21233	0.201329	1.39927	NA	0.374216	0.02	0.190566	0.186314	1.69059	NA	0.0928684	0.57	0.137841	0.746484	0.582719	NA	0.0451178	0.79	0.0180925	0.243713	1.57419	NA	-0.0183663	0.91	-0.0457696	0.73137	0.917227	NA	0.0731558	0.66	-0.00138383	0.284962	1.5962	NA	-0.0523745	0.75	-0.151776	0.264918	-1.243	NA	Amoebophryaceae_X	central Arctic Ocean	NCBI; HM581715.1
ASV282	mixoplankton	0.107775	0.51	0.321595	0.243713	0.542188	0.817419	0.224645	0.17	0.289399	0.145306	1.26849	NA	0.23767	0.15	0.202787	0.28266	0.0539337	0.979068	0.172331	0.29	0.0223007	0	-0.221693	0.913354	-0.0849717	0.61	-0.0734865	0	-0.132747	NA	-0.0797261	0.63	0.003292	0.13008	0.0852004	NA	-0.157201	0.34	-0.224532	0.13861	-1.12959	0.726113	Ansanella	atlantic	OBIS
ASV224	zoobenthos	0.130059	0.43	0.274062	0.271239	0.681117	0.739841	0.0650426	0.69	0.270707	0.163528	0.698965	0.752993	0.129716	0.43	-0.0150723	0.31302	0.283531	0.979068	0.0379831	0.82	-0.141092	0	-1.33965	0.502942	-0.0177237	0.91	-0.193276	0	-0.338103	0.894607	0.234966	0.15	0.171867	0.145306	0.899874	0.634153	0.0731713	0.66	-0.0235247	0.162145	0.157871	0.957683	Anthozoa_XX
ASV620	mesozooplankton	-0.0266148	0.87	0.0737783	0.13617	-1.39245	NA	0.14307	0.38	0.0321352	0.110929	0.0822212	NA	0.13996	0.4	0.313782	0.205604	1.1799	NA	-0.0300055	0.86	0.232846	0.178714	0.677814	NA	0.00376744	0.98	0.168987	0.180415	1.3921	NA	-0.1174	0.48	-0.239728	0.194563	-1.60961	NA	0.0533607	0.75	-0.290227	0.138145	-1.06548	NA	Calanus	Arctic, north atlatic	OBIS/NCBI
ASV196	phytoplankton	0.204671	0.21	0.316051	0.0445158	0.614654	0.739841	0.309855	0.05	0.290733	0.0377397	0.256789	0.882086	0.163176	0.32	0.149955	0.0822525	1.54257	0.400806	0.0534813	0.75	-0.0201219	0.172909	-0.433763	0.80923	-0.4106	0.01	-0.106526	0.151762	-1.70872	0.252712	0.218641	0.18	0.0476276	0.0339901	2.01663	0.119908	-0.098723	0.55	-0.176594	0.0339901	-1.44062	0.488189	Chlamydomonas	Arctic, north atlatic	OBIS/NCBI
ASV205	other heterotrophs-Cercozoan	0.396045	0.01	0.426861	0.163528	2.4244	0.270953	0.340475	0.03	0.403742	0.180415	2.01043	0.509237	0.0247503	0.88	0.116127	0.177767	-1.99007	0.5154	0.00175215	0.99	-0.100801	0.169703	-0.200725	0.928226	-0.261719	0.11	-0.203958	0.166581	-0.177207	NA	0.174128	0.29	0.142073	0.188385	2.04856	NA	0.0298031	0.86	-0.161334	0.190933	-1.42505	0.726113	Cryothecomonas	eastern South Pacific Ocean **	NCBI;HM997341.1
ASV114	other heterotrophs-Cercozoan	0.126091	0.44	0.358423	0.0938079	0.412032	0.853014	0.406581	0.01	0.361754	0.154145	1.81264	0.365632	-0.083085	0.62	-0.0799284	0.0359887	-1.59912	0.41904	-0.0421998	0.8	-0.235833	0.0246051	-0.907264	0.658532	-0.0711721	0.67	-0.294643	0	-1.52203	0.404743	0.251365	0.12	0.278955	0.373645	1.41959	0.380594	0.166254	0.31	0.0230195	0.150814	1.20848	0.653061	Cryothecomonas	Bering Sea	NCBI;KC771151.1
ASV95	other heterotrophs-Cercozoan	0.0299709	0.86	0.248219	0.249385	-0.144355	0.944702	0.297124	0.07	0.243759	0.224824	0.853907	NA	-0.0245692	0.88	-0.00256239	0.863298	-0.641357	0.788276	-0.00253392	0.99	-0.118339	0.300129	0.605498	0.70096	-0.0752708	0.65	-0.167341	0.852552	-0.702971	0.648024	0.180578	0.27	0.145683	0.340651	0.273563	0.861632	0.125995	0.44	-0.0312108	0.315662	-0.572586	NA	Cryothecomonas	subarctic Pacific Ocean; europe	NCBI
ASV100	other heterotrophs-Cercozoan	0.00606708	0.97	0.399789	0.335559	0.781003	0.668851	0.196291	0.23	0.399225	0.950972	0.8041	0.661852	-0.0898828	0.59	-0.0557715	0.325887	-2.39639	0.088954	-0.0730416	0.66	-0.234606	0.574668	-0.667469	0.720985	-0.292278	0.07	-0.305436	0.505853	-1.33723	0.416371	0.258754	0.11	0.281112	0.162145	1.79581	0.158252	0.181591	0.27	-0.00414022	0.424938	-0.557416	0.865941	Cryothecomonas	subarctic Pacific Ocean; europe	NCBI
ASV45	other heterotrophs-Cercozoan	0.0658354	0.69	0.256385	0.827787	0.884623	0.550575	0.129847	0.43	0.251211	0.893362	0.633919	0.704621	0.0353082	0.83	0.0017831	0.867891	-2.51651	0.0239241	0.121315	0.46	-0.118458	0.972052	-1.39539	0.339175	-0.141362	0.39	-0.169765	0.723603	2.15594	0.0641424	0.0155595	0.93	0.14649	0.847604	0.0848299	0.963088	-0.0210106	0.9	-0.0361943	0.803858	-1.08674	0.597673	Cryothecomonas	subarctic Pacific Ocean; europe	NCBI
ASV222	phytoplankton	0.0410271	0.8	-0.0145336	0.626594	0.276202	0.920921	-0.0051653	0.98	-0.0506155	0.685302	-0.183667	0.936545	0.19321	0.24	0.283685	0.795548	1.95571	0.384224	0.231782	0.16	0.248528	0.349433	0.548351	0.805377	0.0166536	0.92	0.206962	0.732282	0.974502	0.706419	-0.234806	0.15	-0.263658	0.474768	-0.687246	0.747736	-0.25229	0.12	-0.251427	0.51248	-1.97053	0.35979	Cylindrotheca
ASV565	parasites	0.0853484	0.61	0.107245	0.00546	-2.46372	0.257107	-0.0119204	0.94	0.0931427	0.00546	-2.56162	0.365632	0.128394	0.44	0.0938841	0	-2.58706	0.329017	0.0880262	0.59	0.0298119	0	-2.43607	0.342034	-0.0415325	0.8	-0.00624636	0.00546	-1.80308	0.519399	-0.0484361	0.77	-0.0225303	0.00546	2.5303	0.201202	-0.089229	0.59	-0.0983311	0.00546	3.71921	0.0722956	Dino-Group-II-Clade-6_X
ASV11	other heterotrophs-Cercozoan	0.307551	0.06	0.155144	0.712979	1.12472	0.694919	0.221896	0.17	0.138216	0.135004	0.074513	0.98101	0.126684	0.44	0.108719	0.122285	3.03344	0.201043	-0.0335789	0.84	0.0200385	0.0417529	0.460182	0.858052	-0.0948858	0.57	-0.027878	0.393368	1.15418	0.701234	-0.0884895	0.59	-0.00821175	0.218874	-3.28015	0.0978739	-0.0370028	0.82	-0.118046	0.732032	-2.99777	0.191401	Ebria	globaly widespread/ arctic cold water	OBIS/NCBI
ASV118	other heterotrophs-Cercozoan	-0.155077	0.35	0.100166	0.0181137	-0.76766	0.619788	-0.0104978	0.95	0.07006	0.0147	-0.297082	NA	0.274983	0.09	0.219802	0.00546	0.114997	0.979068	0.153285	0.35	0.140418	0.00546	0.489968	0.744541	0.0687071	0.68	0.0860357	0.00546	0.885782	0.582491	-0.137492	0.4	-0.139922	0	-0.690319	0.634153	-0.143814	0.38	-0.209845	0.0147	-0.0394435	0.992309	Endomyxa-Ascetosporea_XXX
ASV320	phytoplankton	0.0382493	0.82	0.1701	0.457292	0.0395312	0.983541	0.344314	0.03	0.160366	0.495444	1.34115	0.509237	0.0480047	0.77	0.0503411	0.592444	-0.415901	0.979068	0.0783333	0.64	-0.036704	0.253673	-0.386263	0.841831	-0.183176	0.26	-0.0784482	0.536603	-0.826004	0.702757	-0.0973281	0.56	0.0529566	0.360375	-0.0336203	NA	0.11519	0.48	-0.0679213	0.381699	0.437566	0.871287	Gonyaulax	globaly widespread/ arctic cold water	OBIS/NCBI
ASV424	phytoplankton	0.22343	0.17	0.152446	0.696492	1.47579	0.528431	0.355367	0.03	0.140807	0.715007	1.06337	0.698545	-0.00644754	0.97	0.0678578	0.658282	1.19137	0.739938	-0.0580249	0.73	-0.0135166	0.975552	-1.44159	0.573699	-0.274655	0.09	-0.0544923	0.953488	-1.34571	0.624677	-0.0215993	0.9	0.0269973	0.297385	0.905229	NA	0.025642	0.88	-0.0811847	0.594433	-0.876956	0.865941	Gymnodinium
ASV140	microzooplankton	0.0489227	0.77	0.194683	0.336171	-0.0393196	0.977863	0.441101	0	0.190559	0.268476	0.0868813	0.938521	0.110895	0.5	0.00287266	0.496318	-0.199464	0.979068	-0.255404	0.12	-0.0886553	0.469096	-1.46683	0.152834	-0.248728	0.13	-0.127853	0.459121	0.0136412	0.990172	0.151052	0.36	0.109869	0.263299	0.313255	0.801885	0.141002	0.39	-0.0288402	0.255549	0.547845	0.816961	Gyrodinium	north atlanitc	JN832706.1
ASV28	mixoplankton	0.108058	0.51	0.221871	0.439227	0.392055	0.700796	0.416391	0.01	0.216785	0.478641	0.650838	0.509237	0.220943	0.18	0.00629458	0.574668	-0.0146349	0.981731	0.0574657	0.73	-0.0984625	0.246027	-0.446689	0.658532	-0.401412	0.01	-0.143608	0.518218	-0.649539	0.512413	0.114172	0.49	0.122495	0.344649	0.439505	0.634153	0.0285446	0.86	-0.035566	0.372632	0.202704	0.871287	Helicopedinella	north atlatic	OBIS
ASV504	phytoplankton	-0.0294239	0.86	0.17962	0.653908	-0.564081	0.843514	0.0146771	0.93	0.203189	0.669124	0.0999713	NA	-0.264863	0.1	-0.21091	0.611924	-1.78966	0.475626	-0.112384	0.5	-0.26377	0.972052	-0.701561	NA	-0.206114	0.21	-0.266466	0.999	-0.939172	0.704369	0.270612	0.1	0.293533	0.274169	0.763742	NA	0.224665	0.17	0.164144	0.550588	0.668914	NA	Isochrysis	svalbard, wide spread	OBIS/NCBI
ASV299	other heterotrophs-Labyrinthulean	0.306786	0.06	0.123727	0.139555	-0.676734	0.748241	0.179281	0.27	0.103292	0.150814	1.36636	NA	0.158653	0.33	0.140804	0.146831	-0.0701711	0.979068	0.0878283	0.59	0.0620792	0.201329	2.88135	0.0494916	-0.0860587	0.6	0.0153874	0.155799	0.488156	0.858327	0.0249255	0.88	-0.0552289	0.202094	-1.62562	0.32929	-0.179581	0.27	-0.142464	0.151762	-0.976742	NA	Labyrinthulea_XX
ASV885	zoobenthos	-0.022825	0.89	0.0527542	0.10759	-1.05713	NA	0.28354	0.08	0.0758155	0.10759	0.224273	NA	-0.175961	0.28	-0.187855	0.230613	-0.44362	NA	-0.183792	0.26	-0.184757	0.202094	-0.694485	NA	-0.00749169	0.96	-0.165816	0.182083	0.489524	NA	0.233453	0.15	0.199507	0.0246051	1.47654	NA	0.230086	0.16	0.160673	0.112265	0.982507	NA	Laonice	globaly widespread	OBIS/NCBI
ASV43	other heterotrophs-Cercozoan	0.0453549	0.78	0.206588	0.523816	3.7859	1.26785e-05	0.203525	0.21	0.183557	0.591662	-1.37628	0.376349	0.122675	0.46	0.148584	0.594433	-1.78256	0.14123	-0.047213	0.78	0.0299335	0.379694	-3.27022	0.00106722	-0.0457743	0.78	-0.0344693	0.443603	-1.64426	0.188862	-0.109032	0.51	-0.0143673	0.61116	-3.74676	1.64899e-05	-0.157767	0.34	-0.160596	0.625093	-1.66828	0.165638	Marimonadida_XX	baltic Sea	OBIS/NCBI
ASV7	other heterotrophs-MAST	0.0833291	0.61	0.326155	0.151762	0.813645	0.224281	0.241835	0.14	0.316744	0.120796	0.0918934	0.92882	0.134042	0.42	0.0243381	0.112265	-0.32392	0.82976	-0.0455558	0.78	-0.131888	0.118831	-0.492095	0.573699	-0.282759	0.08	-0.200617	0.125974	0.0259749	0.972898	0.228094	0.16	0.166496	0.135004	0.417289	0.610338	0.10271	0.53	-0.0657566	0.12406	-0.73735	0.406468	MAST-12A
ASV50	other heterotrophs-MAST	0.00192226	0.99	0.0245793	0.263058	6.47187	0.00013903	-0.0574872	0.73	0.0340367	0.153438	-3.76626	0.0982421	-0.0699632	0.67	-0.0774819	0.297385	-8.14815	7.43865e-07	-0.046896	0.78	-0.0775239	0	-5.01868	0.0082269	0.0130177	0.94	-0.0702732	0	10.1769	1.70094e-10	0.00768826	0.96	0.0839168	0.138145	-5.02526	0.0051691	0.0157689	0.92	0.0658897	0.150814	-1.68109	0.653061	MAST-1B	mostly found in polar region	https://doi.org/10.1093/femsec/fiae130
ASV431	other heterotrophs-MAST	-0.22472	0.17	0.0318059	0.594508	-1.97082	0.338583	0.0922278	0.58	-0.0143932	0.661542	0.624498	NA	0.230983	0.16	0.355642	0.647684	0.179996	0.979068	0.308822	0.06	0.288157	0.729635	0.642125	0.800811	0.10657	0.52	0.226091	0.515352	0.18542	0.952917	-0.23324	0.15	-0.301639	0.872547	-0.0577127	NA	-0.110793	0.5	-0.321952	0.909903	0.279992	NA	MAST-9C	mostly found in temperature region	https://doi.org/10.1093/femsec/fiae131
ASV26	other heterotrophs-Labyrinthulean	0.152459	0.35	0.316974	0.0181137	0.55187	0.510066	0.400115	0.01	0.283448	0	0.860901	0.35542	0.273423	0.09	0.213851	0	0.14	0.979068	0.0642478	0.7	0.0338914	0.0359887	-0.093372	0.913354	-0.107106	0.52	-0.0627099	0.0396062	-0.474642	0.624677	-0.00559147	0.97	-0.00933356	0	0.0880577	0.924749	-0.121905	0.46	-0.233791	0	-0.32124	0.865941	Oblongichytrium	north atlanitc	OBIS
ASV463	other heterotrophs-Labyrinthulean	0.204485	0.21	0.206545	0.51248	1.99308	NA	0.451557	0	0.182095	0.555324	1.64689	NA	0.0052567	0.97	0.15967	0.668795	1.11216	NA	0.0251871	0.88	0.0393994	0.28611	-0.641052	NA	-0.261719	0.11	-0.0267322	0.612687	-0.201016	NA	-0.0933065	0.57	-0.0243668	0.398796	-2.03719	NA	0.100805	0.54	-0.170492	0.42385	-0.909271	NA	Oblongichytrium	north atlanitc	OBIS
ASV15	other heterotrophs-Labyrinthulean	-0.109133	0.51	0.251044	0.0776604	-1.49892	0.0739892	0.0756713	0.65	0.236644	0.0731753	-1.17337	0.331351	0.175762	0.28	0.0745635	0.14238	-1.94845	0.0159644	-0.00470859	0.98	-0.0539425	0.150814	-1.70314	0.0394757	-0.147903	0.37	-0.115593	0.118831	-1.11094	0.268622	0.192755	0.24	0.0779165	0.0282215	1.73172	0.0240205	-0.0272431	0.87	-0.100481	0.0893244	1.94044	NA	Oblongichytrium	north atlanitc	OBIS
ASV138	parasites	-0.0414296	0.8	0.317966	0.00546	0.689154	0.803495	0.231215	0.16	0.305111	0.00546	2.12178	0.376349	-0.104773	0.53	0.0524368	0.00546	-0.181885	0.979068	-0.188259	0.25	-0.104113	0	-4.44855	0.00847698	-0.38521	0.02	-0.175616	0	-1.90797	0.335342	0.244039	0.13	0.136482	0.0319165	0.248	0.924749	0.240615	0.14	-0.0897492	0.00546	1.06025	0.816961	Pirsonia	North Atlantic	OBIS/NCBI
ASV115	other heterotrophs-sulcozoa	0.105065	0.52	0.13065	0.177767	2.76458	0.141991	0.115455	0.48	0.117025	0.189409	3.73114	0.0906478	-0.0332758	0.84	0.0866339	0.180415	1.82218	0.526126	-0.198774	0.23	0.0126819	0.250739	-2.8078	0.186682	0.198436	0.23	-0.0268983	0.287793	-0.711324	0.820079	0.0390251	0.81	-0.00248757	0.150814	-1.48446	0.529946	-0.0137703	0.93	-0.0950139	0.150814	-4.43409	0.0143331	Podomonas	japan	OBIS/NCBI
ASV16	phytoplankton	-0.209717	0.2	0.260158	0.5774	0.435119	0.701091	0.161813	0.33	0.27284	0.498368	0.275715	0.835527	-0.0543126	0.74	-0.138087	0.600568	-0.941102	0.384224	-0.0985132	0.55	-0.239406	0.925231	-1.36092	0.0890412	-0.240303	0.14	-0.269545	0.578194	-0.551401	0.621253	0.314544	0.05	0.274527	0.367013	0.283593	0.78179	0.265776	0.1	0.0882284	0.461565	0.457918	0.816961	Polarella	north atlanitc	OBIS/NCBI
ASV162	phytoplankton	-0.141238	0.39	0.251034	0.202682	-0.63829	0.668183	0.160657	0.33	0.255328	0.182083	0.0708036	NA	-0.084857	0.61	-0.0712794	0.331275	-0.380115	0.957987	-0.0435715	0.79	-0.17821	0.284962	-0.136501	0.913354	-0.290129	0.07	-0.217002	0.286852	-0.44233	0.789007	0.215411	0.19	0.209142	0.314568	0.203864	0.892181	0.187182	0.25	0.0297874	0.206853	0.410525	0.865941	Porosira	Arctic, north atlatic	OBIS/NCBI
ASV248	phytoplankton	0.0390346	0.81	0.340673	0.608097	-0.313451	0.868163	0.290755	0.07	0.340805	0.439227	0.303057	0.865564	0.031366	0.85	-0.0522975	0.790541	-1.11594	0.5154	-0.145974	0.38	-0.203982	0.864158	-1.13027	0.474594	-0.385875	0.02	-0.263591	0.524656	-0.727806	0.682137	0.249985	0.12	0.24384	0.651352	0.809479	NA	0.0919042	0.58	0.000735008	0.413886	0.327094	0.871287	Prasinoderma	globaly widespread	OBIS/NCBI
ASV113	other heterotrophs-Cercozoan	0.375273	0.02	0.377188	0.100025	1.19072	0.204257	0.450572	0	0.359353	0.0958162	0.984405	0.478709	0.135109	0.41	0.0823786	0.218227	0.118481	0.979068	-0.101639	0.54	-0.106313	0.190258	-0.466403	0.720985	-0.095057	0.56	-0.194295	0.169703	-0.262618	0.8769	0.0376541	0.82	0.143748	0.0216667	0.371717	0.751748	0.0176389	0.92	-0.124486	0.108983	-0.285231	0.871287	Protaspa-lineage_X	temperature region	NCBI; KM067446.1
ASV180	other heterotrophs-Cercozoan	-0.0513243	0.76	0.258898	0.00546	0.213835	0.960295	0.083443	0.61	0.233131	0.00546	-0.0734794	0.98101	0.0123012	0.94	0.162063	0.00546	2.00114	0.5154	-0.0442053	0.79	0.0169401	0	0.12391	0.943423	-0.189066	0.25	-0.0599864	0.00546	-9.63362	3.55217e-09	0.115708	0.48	0.0037198	0.00546	0.314197	NA	0.117305	0.48	-0.179696	0.00546	-2.17267	0.488189	Protaspa-lineage_X
ASV230	other heterotrophs-Cercozoan	0.15455	0.35	0.330369	0.00546	1.09234	0.701091	0.180345	0.27	0.305335	0.00546	0.751414	0.81549	0.18644	0.26	0.145594	0.00546	1.3357	0.705703	0.000384394	1	-0.0305389	0	-1.18845	0.666765	-0.194645	0.24	-0.119109	0.00546	-0.732724	NA	0.0415166	0.8	0.059823	0.00546	1.86748	NA	-0.0234611	0.89	-0.174631	0.00546	-1.45256	0.726113	Protaspa-lineage_X
ASV308	other heterotrophs-Cercozoan	-0.0278779	0.87	0.269879	0	0.630024	0.847304	0.181766	0.27	0.242492	0	0.835857	0.793822	0.166205	0.31	0.173048	0.00546	1.20145	0.773186	0.0336226	0.84	0.0211621	0.0339901	1.0229	0.720985	-0.0497261	0.76	-0.0596714	0.0339901	0.525248	0.8769	0.251572	0.12	0.000177897	0	1.26298	NA	-0.0585672	0.72	-0.19099	0	-1.32859	NA	Protaspa-lineage_X
ASV156	other heterotrophs-Cercozoan	0.121934	0.46	0.273773	0.053413	0.963285	0.668851	0.108184	0.51	0.271407	0.0396062	0.622335	0.811344	0.0969634	0.56	-0.0227486	0.098068	0.55192	0.979068	-0.186745	0.25	-0.147497	0.194563	-1.8705	0.34403	0.138472	0.4	-0.198421	0.169	-0.303965	0.922663	0.132823	0.42	0.178608	0.0359887	-0.057398	0.980582	-0.0734769	0.66	-0.0166292	0.0359887	-0.641714	0.865941	Protaspa-lineage_X
ASV359	other heterotrophs-Cercozoan	0.118917	0.47	0.288479	0.0147	1.45484	0.550575	0.221674	0.18	0.275232	0.0147	0.88248	0.779502	0.0878064	0.6	0.0599323	0	-0.263474	0.979068	-0.0386747	0.82	-0.0839276	0.0106462	-1.18933	0.666765	-0.0387695	0.81	-0.150736	0.00546	0.168455	NA	0.118992	0.47	0.112705	0.0776604	1.66222	NA	0.0341642	0.84	-0.0924645	0.0776604	0.324533	0.916362	Protaspa-lineage_X
ASV152	other heterotrophs-Cercozoan	-0.0307859	0.85	0.31714	0.0106462	1.46717	0.379373	-0.0642588	0.7	0.318406	0	0.658931	0.791625	0.0312627	0.85	-0.0576057	0.0147	-1.51689	0.5154	0.0179614	0.91	-0.197493	0.0359887	-0.768777	0.720985	-0.102963	0.53	-0.251585	0.0106462	-0.276394	0.928899	0.106471	0.52	0.235022	0.00546	1.85251	0.226694	-0.0448599	0.79	0.00865238	0	0.0146682	0.995677	Protaspa-lineage_X
ASV199	other heterotrophs-Cercozoan	0.147325	0.37	0.333906	0.594508	0.812619	0.713896	0.265008	0.1	0.33527	0.61457	0.959443	0.670718	-0.0438917	0.79	-0.0608874	0.55728	-1.5551	0.5154	0.0481924	0.77	-0.208135	0.902163	-1.04358	0.658532	0.013107	0.94	-0.265051	0.926271	-0.501582	0.8769	0.120487	0.47	0.24766	0.25301	1.49003	0.420206	0.0414743	0.8	0.00932078	0.505853	0.283726	0.916362	Protaspa-lineage_X
ASV23	mixoplankton	-0.188245	0.25	0.295068	0.0396062	0.0542527	0.964722	0.253795	0.12	0.297366	0.0377397	0.680651	0.540663	0.116648	0.48	-0.0623371	0	0.0224392	0.979068	0.00618793	0.97	-0.191196	0	-0.35989	0.740377	-0.168754	0.3	-0.240154	0	-0.429158	0.704369	0.226387	0.17	0.226531	0.0282215	0.589482	0.556	0.217111	0.18	0.0158573	0.0377397	0.305453	0.865941	Pseudopedinella	Arctic, north atlatic	OBIS/NCBI
ASV484	zoobenthos	-0.0653869	0.69	-0.12451	0.150814	-3.39812	0.0902108	-0.134854	0.41	-0.0843153	0.150814	0.625881	0.855352	-0.185846	0.26	-0.294843	0.303753	-2.81524	0.270306	-0.152437	0.35	-0.192969	0.256388	-1.86038	0.502942	0.161058	0.33	-0.121981	0.220154	1.10306	NA	0.0685562	0.68	0.193383	0.05586	2.64953	0.20445	0.164246	0.32	0.280158	0.151762	3.25101	0.128765	Scalibregma	Arctic, north atlatic	OBIS/NCBI
ASV796	other heterotrophs-Choanoflagellatea	-0.0532293	0.75	0.0653339	0.849333	-0.727797	NA	0.132272	0.42	0.0328713	0.629951	0.420976	NA	0.278228	0.09	0.243429	0.924156	0.563302	NA	0.129264	0.43	0.176851	0.860672	1.23859	NA	0.181954	0.27	0.125698	0.762914	1.655	0.541737	-0.118121	0.47	-0.181302	0.893428	-0.753437	NA	-0.0968277	0.56	-0.226248	0.584421	-0.309169	NA	Stephanoecidae_Group_D_X
ASV647	microzooplankton	0.307688	0.06	0.322094	0.163528	1.90224	NA	0.237831	0.14	0.312592	0.165846	1.37789	NA	0.0354785	0.83	0.0256613	0.181336	0.601695	NA	-0.152497	0.35	-0.12886	0.154145	-1.11074	NA	-0.210913	0.2	-0.196988	0.154145	0	NA	0.160977	0.33	0.16296	0.135004	1.43799	NA	-0.0137747	0.93	-0.0663904	0.181336	-0.981449	NA	Strombidinopsis	europe	OBIS
ASV517	microzooplankton	0.187262	0.25	0.262454	0.149798	0.735675	0.809254	0.0948039	0.57	0.241586	0.14238	1.35717	NA	0.0321044	0.85	0.123307	0.06825	0.356583	0.979068	-0.0626676	0.7	-0.0177475	0.0246051	-1.10551	NA	0.0472235	0.78	-0.089308	0.0339901	1.71392	0.5323	0.169173	0.3	0.0406468	0.151762	0.361669	NA	0.0175029	0.92	-0.145559	0.221132	-0.185669	NA	Strombidium	north atlanitc; cold water	OBIS/NCBI
ASV72	other heterotrophs-Cercozoan	-0.134473	0.41	0.282444	0.0147	0.00588269	0.993037	0.0981965	0.55	0.280515	0.0216667	0.109909	0.936545	0.0290983	0.86	-0.0274554	0	0.0154713	0.981731	-0.140155	0.39	-0.155566	0	-0.903244	0.473276	0.0133492	0.94	-0.207478	0	-0.814512	0.529042	0.164464	0.32	0.187852	0.0246051	0.438783	0.72043	0.175318	0.29	-0.0135954	0.0246051	0.135608	0.916362	TAGIRI1-lineage_X
ASV811	other heterotrophs-Cercozoan	0.201241	0.22	0.188428	0.0583511	-0.0316523	NA	0.287622	0.08	0.194988	0.0583511	1.87409	NA	-0.204928	0.21	-0.0795315	0.125974	-2.15593	NA	-0.29811	0.07	-0.155944	0.149798	-1.74428	NA	-0.210913	0.2	-0.180983	0.112265	0	NA	0.209694	0.2	0.180404	0.0246051	2.1668	NA	0.224634	0.17	0.0456073	0.0754342	2.36922	NA	TAGIRI1-lineage_X
ASV175	other heterotrophs-Cercozoan	-0.031624	0.85	0.0166357	0.0359887	1.43096	0.556079	0.246595	0.13	0.0160825	0.0216667	3.74525	0.0849241	0.0400704	0.81	0.00181279	0.0359887	0.0750669	0.979068	-0.102087	0.54	-0.00624012	0.0466098	-1.3317	0.642192	-0.163319	0.32	-0.00983522	0.0417529	0.187548	NA	0.155055	0.35	0.00797806	0	1.1136	0.667701	0.0848876	0.61	-0.00386434	0	-1.43016	0.726113	TAGIRI1-lineage_X
ASV79	zoobenthos	-0.371235	0.02	-0.0342238	0.468488	-0.848682	0.668183	-0.10094	0.54	-0.0754594	0.712979	-0.00487423	0.99618	0.205533	0.21	0.326856	0.461234	0.328887	0.979068	0.0850565	0.61	0.294527	0.796162	0.831549	0.666765	0.152539	0.35	0.250115	0.723603	1.87538	0.183503	-0.0663648	0.69	-0.313877	0.0958162	-0.908703	0.608574	0.0183339	0.91	-0.287329	0.27084	-0.0805438	NA	Talochlamys	Europe, north atlatic	OBIS
ASV37	phytoplankton	-0.266722	0.1	0.187399	0.049	-1.13272	0.0989509	0.0497181	0.76	0.157069	0.06825	-0.603582	0.520647	0.291853	0.07	0.208423	0.0359887	0.650774	0.5154	0.185155	0.26	0.0899011	0.0246051	1.12443	0.098854	0.0552941	0.74	0.0199397	0.0246051	0.908392	0.224945	-0.111934	0.5	-0.0792946	0.0822525	-0.930857	0.200638	-0.13502	0.41	-0.211454	0.0776604	-0.513377	0.726113	Thalassiosira	Arctic, north atlatic	OBIS/NCBI
ASV67	phytoplankton	0.0172443	0.92	0.0629679	0.0938079	-0.802056	0.543722	0.197826	0.23	0.0225795	0.0704646	0.0934514	0.938521	0.153475	0.35	0.30562	0.110929	0.248148	0.979068	0.152476	0.35	0.230951	0.163528	0.531974	0.720985	-0.0171151	0.92	0.170522	0.122285	0.367394	0.824545	-0.159204	0.33	-0.238629	0.0377397	-0.596538	0.66405	-0.112547	0.5	-0.281478	0.05586	-0.274481	0.871287	Thalassiosira	Arctic, north atlatic	OBIS/NCBI
ASV36	phytoplankton	0.199087	0.22	0.220931	0.172407	1.74799	0.0116653	0.170086	0.3	0.200901	0.151762	-0.157712	0.878971	0.184449	0.26	0.123018	0.277075	-0.969548	0.321173	0.0167488	0.92	0.00143638	0.232834	-0.636745	0.53836	-0.104765	0.53	-0.0618145	0.232834	1.94891	0.0043514	0.00203026	0.99	0.0169229	0.264918	-0.611041	0.501457	0.00192972	0.99	-0.139696	0.172909	-0.226525	0.871287	Thalassiosira	Arctic, north atlatic	OBIS/NCBI
ASV25	other heterotrophs-Cercozoan	0.0390345	0.81	0.43008	0.209879	2.8654	0.0739892	0.0675676	0.68	0.409549	0.209879	2.53709	0.365734	0.0749598	0.65	0.0954545	0.193582	-3.95805	0.0604619	0.080175	0.63	-0.119923	0.183152	-0.720208	0.788925	-0.0580601	0.73	-0.220481	0.186314	-0.0118846	0.993606	0.182596	0.27	0.162535	0.202094	2.95805	0.0777292	0.0336771	0.84	-0.143303	0.21709	-2.73354	0.205758	Thaumatomonadida_XX
ASV716	unassigned	0.286957	0.08	0.185681	0.461565	-0.980664	0.728422	0.205512	0.21	0.175911	0.519066	1.56744	NA	-0.0352637	0.83	0.0482794	0.522974	-2.03692	0.499977	-0.0473079	0.77	-0.0457521	0.326967	1.94029	0.473276	-0.261719	0.11	-0.0902744	0.405102	-0.768444	NA	0.104039	0.53	0.0638119	0.690356	-2.13629	NA	-0.163807	0.32	-0.0681826	0.7085	-2.23523	NA	unassigned
ASV497	unassigned	-0.344239	0.03	-0.15359	0	-3.57431	0.0741103	-0.332588	0.04	-0.152662	0.00546	-2.73015	0.197092	-0.140179	0.39	0.0158768	0	1.11759	0.7976	-0.0992153	0.55	0.0854017	0.00546	2.34399	0.34403	0.158939	0.33	0.113482	0	3.26487	0.0924456	0.205669	0.21	-0.103003	0	-2.21208	0.325855	0.178818	0.28	0.00654723	0.00546	-0.888038	0.865941	unassigned
ASV259	unassigned	0.0445675	0.79	0.183365	0.115298	0.576758	0.804806	0.402423	0.01	0.152397	0.110929	2.14985	0.274126	0.070341	0.67	0.214006	0.151762	0.164848	0.979068	0.0951543	0.56	0.096546	0.17519	-1.68154	0.410851	-0.259803	0.11	0.0265125	0.151762	0.131702	0.954562	0.0341421	0.84	-0.0866483	0.05586	0.228819	0.924749	0.0987056	0.55	-0.215897	0.133489	0.374039	0.882143	unassigned
ASV752	unassigned	-0.275075	0.09	-0.0769746	0.0181137	-2.60709	0.226297	-0.00922872	0.96	-0.0911982	0.0147	0.968988	NA	0.0699632	0.67	0.122552	0.00546	0.742279	0.957987	-0.103402	0.53	0.140446	0.00546	0.998809	NA	0.277504	0.09	0.136561	0.00546	1.67658	0.535255	0.0630438	0.7	-0.154736	0	-0.715501	NA	0.0526913	0.75	-0.0990749	0.0147	-0.463482	NA	unassigned
ASV270	unassigned	-0.0794802	0.63	0.185344	0.610755	-0.313543	0.907497	0.325016	0.04	0.177167	0.527172	0.85933	0.704621	0.0226653	0.89	0.0358998	0.5669	0.13214	0.979068	-0.102563	0.53	-0.0561427	0.892819	-0.757442	0.73605	-0.185213	0.26	-0.0986577	0.543538	0.471499	0.8769	0.167838	0.31	0.0747562	0.395337	0.762605	0.722117	0.132473	0.42	-0.0570796	0.49339	0.352588	0.89299	unassigned
ASV311	unassigned	0.0301862	0.86	0.276015	0.0510802	0.37489	NA	0.106468	0.52	0.278202	0.0510802	0.191375	NA	-0.22505	0.17	-0.0585946	0.113721	-0.943408	NA	-0.237747	0.15	-0.179091	0.13617	-0.465724	NA	-0.210913	0.2	-0.224844	0.106745	-0.289337	NA	0.290182	0.07	0.212158	0.0216667	0.943186	NA	0.184369	0.26	0.0150858	0.05586	0.295642	NA	unassigned
ASV1028	unassigned	0.0542152	0.74	-0.0241522	0.0319165	4.73357	0.0125169	-0.076574	0.64	-0.0123107	0.0510802	-3.98601	0.0770354	-0.246408	0.13	-0.0887481	0.0181137	-3.64258	0.088954	-0.0937398	0.57	-0.0643195	0.0181137	-2.37585	0.34403	0.0196613	0.91	-0.0456042	0.0181137	-1.82654	0.519399	-0.0113895	0.95	0.0659057	0.0631261	-3.42668	0.0829775	0.062455	0.71	0.0825294	0.0608968	-1.32052	0.786616	unassigned
ASV243	unassigned	0.0654964	0.69	0.0974301	0	0.153427	0.964722	0.272774	0.09	0.0672568	0	2.06291	0.506731	0.0887069	0.59	0.220738	0	0.399229	0.979068	-0.0282534	0.86	0.142497	0.00546	-1.35585	0.642192	-0.0221337	0.89	0.0885118	0	2.07393	NA	-0.211363	0.2	-0.142345	0	-0.97186	0.72043	0.0875465	0.6	-0.210313	0	0.725447	0.865941	unassigned
ASV852	unassigned	-0.152079	0.36	-0.0290478	0.165101	-1.93009	NA	0.001923	0.99	0.00149676	0.00546	-0.408456	NA	-0.263371	0.11	-0.233926	0.211298	-1.78725	NA	-0.203189	0.21	-0.185734	0.266106	-1.14892	NA	-0.141877	0.39	-0.143292	0.188385	-0.0645847	NA	0.155523	0.34	0.193711	0.905798	1.53136	NA	0.323322	0.04	0.212863	0.0359887	1.955	NA	unassigned
ASV82	unassigned	0.167773	0.31	0.117523	0.237238	1.50604	0.46957	0.110592	0.5	0.1037	0.234119	-1.21654	0.617173	0.0507603	0.76	0.0901532	0.213872	-1.17373	0.69599	-0.033921	0.84	0.0218233	0.207752	0.227599	0.913354	0.0893073	0.59	-0.0156958	0.209879	7.4317	1.3724e-09	0.0626456	0.7	-0.0132365	0.218874	-3.35143	0.0176229	0.0210576	0.9	-0.0963858	0.243559	-1.78167	0.51463	unassigned
ASV547	microzooplankton	0.229518	0.16	0.280076	0.0147	0.428776	NA	0.223412	0.17	0.276322	0	1.0484	NA	0.0634282	0.7	-0.0128696	0	-0.166589	NA	-0.059581	0.72	-0.142029	0.0246051	-0.390843	NA	-0.11096	0.5	-0.195756	0.0282215	0.844647	NA	0.306762	0.06	0.173359	0	1.8182	NA	0.0249995	0.88	-0.0263038	0	-0.137816	NA	Urotricha	europe, greenland	OBIS/NCBI
			< 0.01
			< 0.05
			< 0.1

## Sheet: Table S5
Table S05: Intraction of families based on spearman coefficient analysis on eukaryote families represent in the study (showed only the correlation > 0.4, and P value adjusted (BH) <0.05).
Family1	Family2	Correlation	P_value	P_adjusted (BH)
Acantharea_B1	Dino-Group-II-Clade-10-and-11	0.7	0	0
Acanthoecidae	Heterocapsaceae	0.7	0	0
Amoebophryaceae	Dino-Group-I-Clade-6	0.8	0	0
Amphidiniopsidaceae	Thaumatomonadida_X	0.8	0	0
Astartidae	Ctenodiscidae	0.7	0	0
Calanidae	Gymnodiniaceae	0.7	0	0
Calanidae	Thalassiosiraceae	0.7	0	0
Chaetocerotaceae	MAST-12	0.7	0	0
Chaetocerotaceae	Thalassiosiraceae	0.7	0	0
Chaetopteridae	Chlamydomonadaceae	0.7	0	0
Chaetopteridae	Pirsoniaceaeáµ€	0.7	0	0
Chattonellaceae	Euphausiidae	0.7	0	0
Chattonellaceae	Myidae	0.8	0	0
Chiridotidae	Telonemea-Group-2	1	0	0
Cryothecomonas-lineage	MAST-1	0.7	0	0
Ctenodiscidae	Pectinidae	0.7	0	0
Dino-Group-II_X	Phaeocystaceae	0.7	0	0
Dino-Group-II_X	Pirsoniaceaeáµ€	0.7	0	0
Dino-Group-II_X	Styelidae	0.7	0	0
Dino-Group-II_X	Suessiaceae	0.7	0	0
Dino-Group-II-Clade-10-and-11	Hiatellidae	0.7	0	0
Endomyxa-Ascetosporea_XX	Metridinidae	0.7	0	0
Endomyxa-Ascetosporea_XX	Phaeocystaceae	0.8	0	0
Euphausiidae	Myidae	0.8	0	0
Euphausiidae	RAD-B_X_Group-IV_X	0.7	0	0
Heterocapsaceae	Styelidae	0.7	0	0
Hiatellidae	RAD-B_X_Group-II	0.8	0	0
Lecudinidae	Ophiuridae	0.9	0	0
Lecudinidae	Stephanoecidae_Group_H	0.7	0	0
Massiteriidae	Sagittidae	0.7	0	0
MAST-1	Thalassiosiraceae	0.7	0	0
MAST-12	MAST-9	0.7	0	0
MAST-12	Oblongichytridiaceae	0.7	0	0
MAST-12	Prasinodermataceae	0.7	0	0
MAST-12	Thalassiosiraceae	0.7	0	0
MAST-3	Massiteriidae	0.7	0	0
MAST-9	Oblongichytridiaceae	0.7	0	0
Metridinidae	Phaeocystaceae	0.7	0	0
Metridinidae	Spionidae	0.7	0	0
Metridinidae	Styelidae	0.7	0	0
Novel-clade-2	Thalassiosiraceae	0.7	0	0
Oblongichytridiaceae	Protaspa-lineage	0.7	0	0
Ophiuridae	Stephanoecidae_Group_H	0.7	0	0
Phaeocystaceae	Styelidae	0.7	0	0
Pirsoniaceaeáµ€	Prasinodermataceae	0.7	0	0
Protaspa-lineage	Suessiaceae	0.7	0	0
Strombidinopsidae	Urotrichidae	0.7	0	0
Acantharea_A_X	Stephanoecidae_Group_D	0.6	0	0
Acantharea_C3	Astartidae	0.6	0	0
Acanthoecidae	Hiatellidae	0.6	0	0
Acanthoecidae	Stephanoecidae_Group_H	0.6	0	0
Actinomonadaceae	Chaetocerotaceae	0.6	0	0
Actinomonadaceae	MAST-1	0.6	0	0
Actinomonadaceae	MAST-12	0.6	0	0
Actinomonadaceae	MAST-9	0.6	0	0
Actinomonadaceae	Oblongichytridiaceae	0.6	0	0
Actinomonadaceae	Thalassiosiraceae	0.6	0	0
Amphidiniopsidaceae	Cryomonadida_X	0.6	0	0
Amphidiniopsidaceae	Dino-Group-II-Clade-15	0.6	0	0
Anthozoa_X	Chaetopteridae	0.6	0	0
Anthozoa_X	Dino-Group-II-Clade-7	0.6	0	0
Anthozoa_X	Pirsoniaceaeáµ€	0.6	0	0
Ascidiidae	Spionidae	0.6	0	0
Astartidae	Cucullaeidae	0.6	0	0
Astartidae	Teleostei	0.6	0	0
Astartidae	Thraustochytriaceae	0.6	0	0
Calanidae	Chaetocerotaceae	0.6	0	0
Calanidae	Endomyxa-Ascetosporea_XX	0.6	0	0
Calanidae	Molgulidae	0.6	0	0
Capitellidae	Chiridotidae	0.6	0	0
Capitellidae	Labyrinthulea_X	0.6	0	0
Capitellidae	Telonemea-Group-2	0.6	0	0
CCW10-lineage	Dino-Group-II_X	0.6	0	0
CCW10-lineage	Isochrysidaceae	0.6	0	0
CCW10-lineage	Pirsoniaceaeáµ€	0.6	0	0
CCW10-lineage	Suessiaceae	0.6	0	0
Cephalotrichidae	Oweniidae	0.6	0	0
Cephalotrichidae	Trichotokaridae	0.6	0	0
Cercozoa_XX	Phagomyxidae	0.6	0	0
Chaetocerotaceae	Cryomonadida_X	0.6	0	0
Chaetocerotaceae	Gymnodiniaceae	0.6	0	0
Chaetocerotaceae	Gyrodiniaceae	0.6	0	0
Chaetocerotaceae	Heterocapsaceae	0.6	0	0
Chaetocerotaceae	Molgulidae	0.6	0	0
Chaetocerotaceae	Oblongichytridiaceae	0.6	0	0
Chaetocerotaceae	TAGIRI1-lineage	0.6	0	0
Chaetopteridae	MAST-12	0.6	0	0
Chaetopteridae	MAST-9	0.6	0	0
Chaetopteridae	Oblongichytridiaceae	0.6	0	0
Chaetopteridae	Prasinodermataceae	0.6	0	0
Chaetopteridae	Protaspa-lineage	0.6	0	0
Chaetopteridae	Pyramimonadaceae	0.6	0	0
Chaetopteridae	Sagittidae	0.6	0	0
Chaetopteridae	Urotrichidae	0.6	0	0
Chattonellaceae	Lecudinidae	0.6	0	0
Chattonellaceae	Ophiuridae	0.6	0	0
Chiridotidae	Sagittidae	0.6	0	0.01
Chlamydomonadaceae	Molgulidae	0.6	0	0
Chlamydomonadaceae	Pirsoniaceaeáµ€	0.6	0	0
Chlamydomonadaceae	Ventricleftida_X	0.6	0	0
Cirratulidae	Phagomyxidae	0.6	0	0
Cryomonadida_X	Protoperidiniaceae	0.6	0	0.01
Cryomonadida_X	Spionidae	0.6	0	0
Cryomonadida_X	Ventricleftida_X	0.6	0	0
Cryothecomonas-lineage	Gymnodiniaceae	0.6	0	0.01
Cryothecomonas-lineage	MAST-12	0.6	0	0
Cryothecomonas-lineage	Novel-clade-2	0.6	0	0
Cryothecomonas-lineage	Thalassiosiraceae	0.6	0	0
Ctenodiscidae	Stephanoecidae_Group_H	0.6	0	0
Ctenodiscidae	Teleostei	0.6	0	0
Cucullaeidae	Fritillariinae	0.6	0	0
Cucullaeidae	Pectinidae	0.6	0	0.01
Cucullaeidae	RAD-B_X_Group-IV_X	0.6	0	0
Didiniidae	MAST-9	0.6	0	0
Dino-Group-I-Clade-1	RAD-B_X_Group-IV_X	0.6	0	0
Dino-Group-I-Clade-5	Stephanoecidae_Group_H	0.6	0	0
Dino-Group-I-Clade-5	Trichotokaridae	0.6	0	0
Dino-Group-II_X	Gymnodiniaceae	0.6	0	0
Dino-Group-II_X	MAST-9	0.6	0	0
Dino-Group-II_X	Metridinidae	0.6	0	0
Dino-Group-II_X	Phagomyxidae	0.6	0	0
Dino-Group-II_X	Pyramimonadaceae	0.6	0	0
Dino-Group-II-Clade-15	Sagittidae	0.6	0	0
Dino-Group-II-Clade-15	Spionidae	0.6	0	0
Endomyxa-Ascetosporea_XX	Gymnodiniaceae	0.6	0	0
Endomyxa-Ascetosporea_XX	MAST-1	0.6	0	0
Endomyxa-Ascetosporea_XX	Molgulidae	0.6	0	0
Endomyxa-Ascetosporea_XX	Novel-clade-2	0.6	0	0
Endomyxa-Ascetosporea_XX	Pyramimonadaceae	0.6	0	0
Endomyxa-Ascetosporea_XX	Styelidae	0.6	0	0
Endomyxa-Ascetosporea_XX	Thalassiosiraceae	0.6	0	0
Euphausiidae	Lecudinidae	0.6	0	0
Fritillariinae	Metridinidae	0.6	0	0
Fritillariinae	Sagittidae	0.6	0	0
Gymnodiniaceae	Oblongichytridiaceae	0.6	0	0
Gymnodiniaceae	Thalassiosiraceae	0.6	0	0
Gyrodiniaceae	Heterocapsaceae	0.6	0	0
Heterocapsaceae	Metridinidae	0.6	0	0
Heterocapsaceae	Phaeocystaceae	0.6	0	0
Heterocapsaceae	Thalassiosiraceae	0.6	0	0
Hydrozoa_XX	Stephanoecidae_Group_D	0.6	0	0
Lecudinidae	RAD-B_X_Group-II	0.6	0	0
Marimonadida_X	TAGIRI1-lineage	0.6	0	0
MAST-1	MAST-9	0.6	0	0
MAST-1	Metridinidae	0.6	0	0
MAST-1	Novel-clade-2	0.6	0	0
MAST-1	Phaeocystaceae	0.6	0	0
MAST-1	Pyramimonadaceae	0.6	0	0.01
MAST-12	Pirsoniaceaeáµ€	0.6	0	0
MAST-12	TAGIRI1-lineage	0.6	0	0
MAST-9	Metridinidae	0.6	0	0
MAST-9	Phaeocystaceae	0.6	0	0
MAST-9	Phagomyxidae	0.6	0	0
MAST-9	Pirsoniaceaeáµ€	0.6	0	0
MAST-9	Pyramimonadaceae	0.6	0	0
MAST-9	Suessiaceae	0.6	0	0
MAST-9	Thalassiosiraceae	0.6	0	0
Mermithidae	Prorocentraceae	0.6	0	0
Metridinidae	Pirsoniaceaeáµ€	0.6	0	0
Molgulidae	Phaeocystaceae	0.6	0	0
Molgulidae	Pirsoniaceaeáµ€	0.6	0	0
Novel-clade-2	Phaeocystaceae	0.6	0	0
Oblongichytridiaceae	Prasinodermataceae	0.6	0	0
Oblongichytridiaceae	Pyramimonadaceae	0.6	0	0
Oblongichytridiaceae	Suessiaceae	0.6	0	0
Oblongichytridiaceae	Thalassiosiraceae	0.6	0	0
Opheliidae	Trichotokaridae	0.6	0	0
Pectinidae	Spionidae	0.6	0	0
Pectinidae	Stephanoecidae_Group_D	0.6	0	0
Pectinidae	Stephanoecidae_Group_H	0.6	0	0
Pectinidae	Teleostei	0.6	0	0
Peridiniaceae	Thaumatomonadidae	0.6	0	0
Phaeocystaceae	Pirsoniaceaeáµ€	0.6	0	0
Phaeocystaceae	Pyramimonadaceae	0.6	0	0
Phaeocystaceae	Suessiaceae	0.6	0	0
Phagomyxidae	Prasinodermataceae	0.6	0	0
Phagomyxidae	Pyramimonadaceae	0.6	0	0
Phagomyxidae	Suessiaceae	0.6	0	0
Pirsoniaceaeáµ€	Styelidae	0.6	0	0
Pirsoniaceaeáµ€	Suessiaceae	0.6	0	0
Pirsoniaceaeáµ€	Thaumatomonadida_X	0.6	0	0
Polynoidae	Teleostei	0.6	0	0.01
Polynoidae	Thyasiridae	0.6	0	0
Prasinodermataceae	Suessiaceae	0.6	0	0
Protaspidae	Strombidinopsidae	0.6	0	0
Protaspidae	Urotrichidae	0.6	0	0
Pyramimonadaceae	Suessiaceae	0.6	0	0
RAD-B_X_Group-IV_X	Trichotokaridae	0.6	0	0
Spionidae	Stephanoecidae_Group_D	0.6	0	0
Spionidae	Styelidae	0.6	0	0
Stephanoecidae_Group_H	Teleostei	0.6	0	0
Strombidiidae	Thaumatomonadidae	0.6	0	0
Strombidinopsidae	Thaumatomonadidae	0.6	0	0
Teleostei	Thraustochytriaceae	0.6	0	0
Thaumatomonadidae	Urotrichidae	0.6	0	0
Acantharea_A_X	Astartidae	0.5	0	0.03
Acantharea_A_X	Chattonellaceae	0.5	0	0.03
Acantharea_A_X	Ctenodiscidae	0.5	0	0.03
Acantharea_A_X	Lecudinidae	0.5	0	0.03
Acantharea_A_X	Trichotokaridae	0.5	0	0.03
Acantharea_B1	Botuliformidae	0.5	0	0.01
Acantharea_B1	Cryomonadida_X	0.5	0	0.01
Acantharea_B1	Lecudinidae	0.5	0	0.01
Acantharea_B1	Prasinodermaceae	0.5	0	0.02
Acantharea_B1	Protoperidiniaceae	0.5	0	0.02
Acantharea_B1	RAD-B_X_Group-II	0.5	0	0.01
Acantharea_C3	Acanthoecidae	0.5	0	0.01
Acantharea_C3	Calanidae	0.5	0	0.02
Acantharea_C3	Chaetocerotaceae	0.5	0	0.02
Acantharea_C3	Cryomonadida_X	0.5	0	0.02
Acantharea_C3	Ctenodiscidae	0.5	0	0.03
Acantharea_C3	Cucullaeidae	0.5	0	0.01
Acantharea_C3	Gymnodiniaceae	0.5	0	0.03
Acantharea_C3	Mamiellaceae	0.5	0	0.01
Acantharea_C3	Pectinidae	0.5	0	0.02
Acantharea_C3	RAD-B_X_Group-IV_X	0.5	0	0.02
Acanthoecidae	Calanidae	0.5	0	0.03
Acanthoecidae	Chaetocerotaceae	0.5	0	0.01
Acanthoecidae	Chiridotidae	0.5	0	0.03
Acanthoecidae	Endomyxa-Ascetosporea_XX	0.5	0	0.03
Acanthoecidae	Gyrodiniaceae	0.5	0	0.02
Acanthoecidae	RAD-B_X_Group-II	0.5	0	0.01
Acanthoecidae	Teleostei	0.5	0	0.01
Acanthoecidae	Telonemea-Group-2	0.5	0	0.03
Acanthoecidae	Thalassiosiraceae	0.5	0	0.01
Actinomonadaceae	Didiniidae	0.5	0	0.03
Actinomonadaceae	Gymnodiniaceae	0.5	0	0.02
Actinomonadaceae	Novel-clade-2	0.5	0	0.03
Actinomonadaceae	Pyramimonadaceae	0.5	0	0.02
Actinomonadaceae	Strombidiidae	0.5	0	0.02
Amoebophryaceae	Apusomonadidae	0.5	0	0.02
Amphidiniopsidaceae	Chlamydomonadaceae	0.5	0	0.01
Amphidiniopsidaceae	Dino-Group-I-Clade-3	0.5	0	0.02
Amphidiniopsidaceae	Dino-Group-II_X	0.5	0	0.03
Amphidiniopsidaceae	Pirsoniaceaeáµ€	0.5	0	0.01
Amphidiniopsidaceae	Thaumatomonadidae	0.5	0	0.02
Anthozoa_X	Chaetocerotaceae	0.5	0	0.01
Anthozoa_X	Chiridotidae	0.5	0	0.03
Anthozoa_X	Chlamydomonadaceae	0.5	0	0.02
Anthozoa_X	Cryomonadida_X	0.5	0	0.03
Anthozoa_X	Cryothecomonas-lineage	0.5	0	0.02
Anthozoa_X	Dino-Group-II-Clade-15	0.5	0	0.01
Anthozoa_X	Endomyxa-Ascetosporea_XX	0.5	0	0.02
Anthozoa_X	MAST-12	0.5	0	0.01
Anthozoa_X	Molgulidae	0.5	0	0.02
Anthozoa_X	Phaeocystaceae	0.5	0	0.03
Anthozoa_X	Pyramimonadaceae	0.5	0	0.03
Anthozoa_X	Pyuridae	0.5	0	0.02
Anthozoa_X	Telonemea-Group-2	0.5	0	0.03
Anthozoa_X	Thaumatomonadida_X	0.5	0	0.01
Apusomonadidae	Protaspidae	0.5	0	0.03
Ascidiidae	Dino-Group-II-Clade-6	0.5	0	0.03
Ascidiidae	Golfingiidae	0.5	0	0.01
Ascidiidae	Hydrozoa_XX	0.5	0	0.03
Ascidiidae	Labyrinthulea_X	0.5	0	0.01
Ascidiidae	Stephanoecidae_Group_D	0.5	0	0.03
Ascidiidae	Thraustochytriaceae	0.5	0	0.02
Astartidae	Chiridotidae	0.5	0	0.02
Astartidae	Cryomonadida_X	0.5	0	0.02
Astartidae	Endomyxa-Ascetosporea_XX	0.5	0	0.01
Astartidae	Gymnodiniaceae	0.5	0	0.02
Astartidae	MAST-1	0.5	0	0.02
Astartidae	Pectinidae	0.5	0	0.01
Astartidae	Protoperidiniaceae	0.5	0	0.03
Astartidae	RAD-B_X_Group-IV_X	0.5	0	0.01
Astartidae	Telonemea-Group-2	0.5	0	0.02
Astartidae	Trichotokaridae	0.5	0	0.01
Bacillariophyceae_XX	Dino-Group-II-Clade-10-and-11	0.5	0	0.02
Bacillariophyceae_XX	Protoperidiniaceae	0.5	0	0.03
Botuliformidae	Dino-Group-II-Clade-10-and-11	0.5	0	0.01
Botuliformidae	Holostichidae	0.5	0	0.03
Botuliformidae	Strombidiidae	0.5	0	0.03
Calanidae	Cryothecomonas-lineage	0.5	0	0.01
Calanidae	Heterocapsaceae	0.5	0	0.03
Calanidae	MAST-1	0.5	0	0.01
Calanidae	MAST-9	0.5	0	0.02
Calanidae	Pectinidae	0.5	0	0.01
Calanidae	Phaeocystaceae	0.5	0	0.01
Capitellidae	Dino-Group-II-Clade-15	0.5	0	0.01
Capitellidae	Fritillariinae	0.5	0	0.03
Capitellidae	Nephtyidae	0.5	0	0.02
CCW10-lineage	Chlamydomonadaceae	0.5	0	0.01
CCW10-lineage	Massiteriidae	0.5	0	0.02
CCW10-lineage	MAST-12	0.5	0	0.01
CCW10-lineage	MAST-9	0.5	0	0.02
CCW10-lineage	Phaeocystaceae	0.5	0	0.01
CCW10-lineage	Phagomyxidae	0.5	0	0.02
CCW10-lineage	Prasinodermataceae	0.5	0	0.02
CCW10-lineage	Thaumatomonadidae	0.5	0	0.01
CCW10-lineage	Ventricleftida_X	0.5	0	0.01
Cephalotrichidae	Opheliidae	0.5	0	0.02
Cephalotrichidae	Sagittidae	0.5	0	0.02
Cercozoa_XX	Chaetopteridae	0.5	0	0.03
Cercozoa_XX	MAST-9	0.5	0	0.03
Cercozoa_XX	Pyramimonadaceae	0.5	0	0.02
Chaetocerotaceae	Chaetopteridae	0.5	0	0.03
Chaetocerotaceae	Chlamydomonadaceae	0.5	0	0.01
Chaetocerotaceae	Cryothecomonas-lineage	0.5	0	0.02
Chaetocerotaceae	Dino-Group-I-Clade-1	0.5	0	0.02
Chaetocerotaceae	Dino-Group-II_X	0.5	0	0.02
Chaetocerotaceae	Endomyxa-Ascetosporea_XX	0.5	0	0.01
Chaetocerotaceae	Marimonadida_X	0.5	0	0.01
Chaetocerotaceae	MAST-1	0.5	0	0.01
Chaetocerotaceae	MAST-9	0.5	0	0.01
Chaetocerotaceae	Novel-clade-2	0.5	0	0.02
Chaetocerotaceae	Phaeocystaceae	0.5	0	0.01
Chaetocerotaceae	Pirsoniaceaeáµ€	0.5	0	0.01
Chaetocerotaceae	Strombidiidae	0.5	0	0.01
Chaetopteridae	Cryomonadida_X	0.5	0	0.03
Chaetopteridae	Dino-Group-II-Clade-15	0.5	0	0.02
Chaetopteridae	Molgulidae	0.5	0	0.01
Chaetopteridae	Phaeocystaceae	0.5	0	0.01
Chaetopteridae	Phagomyxidae	0.5	0	0.02
Chaetopteridae	Protaspidae	0.5	0	0.01
Chaetopteridae	Suessiaceae	0.5	0	0.01
Chaetopteridae	Thaumatomonadida_X	0.5	0	0.01
Chaetopteridae	Thaumatomonadidae	0.5	0	0.01
Chattonellaceae	Dino-Group-I-Clade-5	0.5	0	0.01
Chiridotidae	Ctenodiscidae	0.5	0	0.03
Chiridotidae	Dino-Group-II-Clade-15	0.5	0	0.01
Chiridotidae	Dino-Group-II-Clade-6	0.5	0	0.01
Chiridotidae	Stephanoecidae_Group_H	0.5	0	0.03
Chlamydomonadaceae	Cryomonadida_X	0.5	0	0.02
Chlamydomonadaceae	Cryothecomonas-lineage	0.5	0	0.02
Chlamydomonadaceae	Dino-Group-II_X	0.5	0	0.02
Chlamydomonadaceae	MAST-12	0.5	0	0.01
Chlamydomonadaceae	Oblongichytridiaceae	0.5	0	0.01
Chlamydomonadaceae	Sagittidae	0.5	0	0.01
Chlamydomonadaceae	Thaumatomonadida_X	0.5	0	0.02
Chlamydomonadaceae	Thaumatomonadidae	0.5	0	0.01
Cirratulidae	Phaeocystaceae	0.5	0	0.03
Cryomonadida_X	Ctenodiscidae	0.5	0	0.01
Cryomonadida_X	Cucullaeidae	0.5	0	0.02
Cryomonadida_X	Dino-Group-I-Clade-4	0.5	0	0.01
Cryomonadida_X	Dino-Group-II-Clade-15	0.5	0	0.02
Cryomonadida_X	Heterocapsaceae	0.5	0	0.02
Cryomonadida_X	Holostichidae	0.5	0	0.01
Cryomonadida_X	Mamiellaceae	0.5	0	0.03
Cryomonadida_X	Pectinidae	0.5	0	0.01
Cryomonadida_X	Polynoidae	0.5	0	0.02
Cryomonadida_X	RAD-B_X_Group-IV_X	0.5	0	0.03
Cryomonadida_X	Stephanoecidae_Group_D	0.5	0	0.02
Cryothecomonas-lineage	Endomyxa-Ascetosporea_XX	0.5	0	0.01
Cryothecomonas-lineage	MAST-9	0.5	0	0.02
Cryothecomonas-lineage	Oblongichytridiaceae	0.5	0	0.01
Cryothecomonas-lineage	Phaeocystaceae	0.5	0	0.02
Cryothecomonas-lineage	Prasinodermataceae	0.5	0	0.03
Cryothecomonas-lineage	Suessiaceae	0.5	0	0.02
Cryothecomonas-lineage	TAGIRI1-lineage	0.5	0	0.01
Ctenodiscidae	Cucullaeidae	0.5	0	0.01
Ctenodiscidae	Endomyxa-Ascetosporea_XX	0.5	0	0.01
Ctenodiscidae	Hydrozoa_XX	0.5	0	0.03
Ctenodiscidae	Lecudinidae	0.5	0	0.02
Ctenodiscidae	RAD-B_X_Group-IV_X	0.5	0	0.01
Ctenodiscidae	Spionidae	0.5	0	0.01
Ctenodiscidae	Stephanoecidae_Group_D	0.5	0	0.03
Ctenodiscidae	Telonemea-Group-2	0.5	0	0.03
Ctenodiscidae	Thraustochytriaceae	0.5	0	0.01
Cucullaeidae	Dino-Group-II-Clade-15	0.5	0	0.02
Cucullaeidae	Endomyxa-Ascetosporea_XX	0.5	0	0.03
Cucullaeidae	Hydrozoa_XX	0.5	0	0.01
Cucullaeidae	MAST-9	0.5	0	0.03
Cucullaeidae	Metridinidae	0.5	0	0.02
Cucullaeidae	Spionidae	0.5	0	0.01
Cucullaeidae	Stephanoecidae_Group_D	0.5	0	0.01
Cucullaeidae	Stephanoecidae_Group_H	0.5	0	0.03
Cucullaeidae	Trichotokaridae	0.5	0	0.03
Didiniidae	Dino-Group-I-Clade-4	0.5	0	0.03
Didiniidae	Pyramimonadaceae	0.5	0	0.03
Didiniidae	Urotrichidae	0.5	0	0.03
Dino-Group-I-Clade-1	Protoperidiniaceae	0.5	0	0.01
Dino-Group-I-Clade-4	Protaspidae	0.5	0	0.01
Dino-Group-I-Clade-4	Strombidiidae	0.5	0	0.02
Dino-Group-I-Clade-5	Lecudinidae	0.5	0	0.02
Dino-Group-I-Clade-5	Polynoidae	0.5	0	0.01
Dino-Group-I-Clade-5	Stephanoecidae_Group_D	0.5	0	0.02
Dino-Group-I-Clade-5	Teleostei	0.5	0	0.01
Dino-Group-I-Clade-6	Mermithidae	0.5	0	0.02
Dino-Group-I-Clade-6	Protaspidae	0.5	0	0.01
Dino-Group-II_X	Endomyxa-Ascetosporea_XX	0.5	0	0.02
Dino-Group-II_X	Heterocapsaceae	0.5	0	0.01
Dino-Group-II_X	MAST-1	0.5	0	0.01
Dino-Group-II_X	Novel-clade-2	0.5	0	0.02
Dino-Group-II_X	Oblongichytridiaceae	0.5	0	0.01
Dino-Group-II_X	Protaspa-lineage	0.5	0	0.03
Dino-Group-II_X	Spionidae	0.5	0	0.03
Dino-Group-II_X	Thalassiosiraceae	0.5	0	0.03
Dino-Group-II-Clade-10-and-11	Endomyxa-Ascetosporea_XX	0.5	0	0.02
Dino-Group-II-Clade-10-and-11	Lecudinidae	0.5	0	0.01
Dino-Group-II-Clade-10-and-11	Metridinidae	0.5	0	0.03
Dino-Group-II-Clade-10-and-11	RAD-B_X_Group-II	0.5	0	0.02
Dino-Group-II-Clade-15	Fritillariinae	0.5	0	0.02
Dino-Group-II-Clade-15	Metridinidae	0.5	0	0.01
Dino-Group-II-Clade-15	Nephtyidae	0.5	0	0.02
Dino-Group-II-Clade-15	Styelidae	0.5	0	0.01
Dino-Group-II-Clade-15	Telonemea-Group-2	0.5	0	0.02
Dino-Group-II-Clade-15	Trichotokaridae	0.5	0	0.02
Dino-Group-II-Clade-6	Sagittidae	0.5	0	0.03
Dino-Group-II-Clade-6	Telonemea-Group-2	0.5	0	0.01
Dino-Group-II-Clade-7	Endomyxa-Ascetosporea_XX	0.5	0	0.03
Dino-Group-II-Clade-7	Molgulidae	0.5	0	0.01
Endomyxa-Ascetosporea_XX	Fritillariinae	0.5	0	0.03
Endomyxa-Ascetosporea_XX	Heterocapsaceae	0.5	0	0.02
Endomyxa-Ascetosporea_XX	Marimonadida_X	0.5	0	0.02
Endomyxa-Ascetosporea_XX	MAST-9	0.5	0	0.01
Endomyxa-Ascetosporea_XX	Oblongichytridiaceae	0.5	0	0.01
Endomyxa-Ascetosporea_XX	Pectinidae	0.5	0	0.01
Endomyxa-Ascetosporea_XX	RAD-B_X_Group-IV_X	0.5	0	0.02
Endomyxa-Ascetosporea_XX	Sagittidae	0.5	0	0.03
Endomyxa-Ascetosporea_XX	Spionidae	0.5	0	0.01
Endomyxa-Ascetosporea_XX	Stephanoecidae_Group_H	0.5	0	0.01
Endomyxa-Ascetosporea_XX	Suessiaceae	0.5	0	0.01
Endomyxa-Ascetosporea_XX	Teleostei	0.5	0	0.02
Endomyxa-Ascetosporea_XX	Thraustochytriaceae	0.5	0	0.03
Euphausiidae	Hydrozoa_XX	0.5	0	0.01
Euphausiidae	Ophiuridae	0.5	0	0.01
Euphausiidae	Spionidae	0.5	0	0.02
Fritillariinae	Hydrozoa_XX	0.5	0	0.01
Fritillariinae	Labyrinthulea_X	0.5	0	0.01
Fritillariinae	Molgulidae	0.5	0	0.03
Fritillariinae	Spionidae	0.5	0	0.01
Fritillariinae	Stephanoecidae_Group_D	0.5	0	0.01
Fritillariinae	Styelidae	0.5	0	0.03
Gymnodiniaceae	MAST-1	0.5	0	0.02
Gymnodiniaceae	MAST-12	0.5	0	0.01
Gymnodiniaceae	MAST-9	0.5	0	0.01
Gymnodiniaceae	Molgulidae	0.5	0	0.03
Gymnodiniaceae	Phaeocystaceae	0.5	0	0.01
Gymnodiniaceae	Pirsoniaceaeáµ€	0.5	0	0.03
Gymnodiniaceae	Protaspa-lineage	0.5	0	0.03
Gymnodiniaceae	Pyramimonadaceae	0.5	0	0.01
Gymnodiniaceae	Suessiaceae	0.5	0	0.01
Gyrodiniaceae	Marimonadida_X	0.5	0	0.02
Gyrodiniaceae	MAST-12	0.5	0	0.02
Gyrodiniaceae	Molgulidae	0.5	0	0.03
Gyrodiniaceae	Novel-clade-2	0.5	0	0.02
Gyrodiniaceae	Oblongichytridiaceae	0.5	0	0.03
Gyrodiniaceae	RAD-B_X_Group-II	0.5	0	0.03
Gyrodiniaceae	Styelidae	0.5	0	0.01
Gyrodiniaceae	TAGIRI1-lineage	0.5	0	0.02
Gyrodiniaceae	Thalassiosiraceae	0.5	0	0.02
Heterocapsaceae	Hiatellidae	0.5	0	0.03
Heterocapsaceae	MAST-12	0.5	0	0.02
Heterocapsaceae	MAST-9	0.5	0	0.03
Heterocapsaceae	Pirsoniaceaeáµ€	0.5	0	0.03
Heterocapsaceae	Polynoidae	0.5	0	0.02
Heterocapsaceae	Sagittidae	0.5	0	0.01
Hiatellidae	Lecudinidae	0.5	0	0.01
Hiatellidae	Prasinodermaceae	0.5	0	0.03
Holostichidae	Pectinidae	0.5	0	0.02
Hydrozoa_XX	Labyrinthulea_X	0.5	0	0.03
Hydrozoa_XX	Lecudinidae	0.5	0	0.01
Hydrozoa_XX	Pectinidae	0.5	0	0.03
Hydrozoa_XX	Spionidae	0.5	0	0.01
Hydrozoa_XX	Styelidae	0.5	0	0.03
Isochrysidaceae	Phagomyxidae	0.5	0	0.01
Labyrinthulea_X	Nephtyidae	0.5	0	0.02
Labyrinthulea_X	Spionidae	0.5	0	0.01
Labyrinthulea_X	Stephanoecidae_Group_D	0.5	0	0.01
Lecudinidae	Pectinidae	0.5	0	0.03
Lecudinidae	Stephanoecidae_Group_D	0.5	0	0.01
Maldanidae	Trachelophyllidae	0.5	0	0.03
Marimonadida_X	Novel-clade-2	0.5	0	0.02
Marimonadida_X	Oblongichytridiaceae	0.5	0	0.02
MAST-1	MAST-12	0.5	0	0.01
MAST-1	Oblongichytridiaceae	0.5	0	0.02
MAST-1	Pirsoniaceaeáµ€	0.5	0	0.02
MAST-1	Protoperidiniaceae	0.5	0	0.02
MAST-1	Styelidae	0.5	0	0.03
MAST-1	Suessiaceae	0.5	0	0.02
MAST-12	Mamiellaceae	0.5	0	0.01
MAST-12	Marimonadida_X	0.5	0	0.02
MAST-12	Molgulidae	0.5	0	0.02
MAST-12	Novel-clade-2	0.5	0	0.01
MAST-12	Phaeocystaceae	0.5	0	0.01
MAST-12	Protaspa-lineage	0.5	0	0.01
MAST-12	Suessiaceae	0.5	0	0.02
MAST-3	Paulinellidae	0.5	0	0.03
MAST-3	Protaspidae	0.5	0	0.01
MAST-3	Strombidinopsidae	0.5	0	0.02
MAST-9	Mamiellaceae	0.5	0	0.03
MAST-9	Marimonadida_X	0.5	0	0.03
MAST-9	Novel-clade-2	0.5	0	0.02
MAST-9	Prasinodermataceae	0.5	0	0.01
MAST-9	Protaspa-lineage	0.5	0	0.01
MAST-9	Styelidae	0.5	0	0.01
Metridinidae	Novel-clade-2	0.5	0	0.01
Metridinidae	Pyramimonadaceae	0.5	0	0.01
Metridinidae	RAD-B_X_Group-IV_X	0.5	0	0.03
Metridinidae	Sagittidae	0.5	0	0.01
Metridinidae	Suessiaceae	0.5	0	0.03
Metridinidae	Thalassiosiraceae	0.5	0	0.01
Molgulidae	Oblongichytridiaceae	0.5	0	0.02
Molgulidae	Prasinodermataceae	0.5	0	0.02
Molgulidae	Pyramimonadaceae	0.5	0	0.03
Molgulidae	Sagittidae	0.5	0	0.01
Molgulidae	Thalassiosiraceae	0.5	0	0.03
Myidae	RAD-B_X_Group-IV_X	0.5	0	0.01
Myidae	RAD-C_Xb	0.5	0	0.03
Myidae	Thyasiridae	0.5	0	0.03
Novel-clade-2	Oblongichytridiaceae	0.5	0	0.03
Novel-clade-2	Pectinidae	0.5	0	0.02
Novel-clade-2	Styelidae	0.5	0	0.03
Novel-clade-2	TAGIRI1-lineage	0.5	0	0.02
Oblongichytridiaceae	Phaeocystaceae	0.5	0	0.02
Oblongichytridiaceae	Phagomyxidae	0.5	0	0.02
Oblongichytridiaceae	Pirsoniaceaeáµ€	0.5	0	0.01
Opheliidae	RAD-B_X_Group-IV_X	0.5	0	0.01
Opheliidae	Scalibregmatidae	0.5	0	0.01
Opheliidae	Stephanoecidae_Group_D	0.5	0	0.03
Ophiuridae	RAD-B_X_Group-II	0.5	0	0.01
Pectinidae	Phaeocystaceae	0.5	0	0.03
Pectinidae	RAD-B_X_Group-IV_X	0.5	0	0.01
Pectinidae	Styelidae	0.5	0	0.02
Pectinidae	Thalassiosiraceae	0.5	0	0.02
Pectinidae	Thraustochytriaceae	0.5	0	0.01
Phaeocystaceae	Phagomyxidae	0.5	0	0.01
Phaeocystaceae	Prasinodermataceae	0.5	0	0.01
Phaeocystaceae	Sagittidae	0.5	0	0.02
Phaeocystaceae	Spionidae	0.5	0	0.02
Phaeocystaceae	Thalassiosiraceae	0.5	0	0.01
Phagomyxidae	Pirsoniaceaeáµ€	0.5	0	0.02
Phagomyxidae	Protaspa-lineage	0.5	0	0.03
Pirsoniaceaeáµ€	Protaspa-lineage	0.5	0	0.03
Pirsoniaceaeáµ€	Pyramimonadaceae	0.5	0	0.01
Pirsoniaceaeáµ€	Sagittidae	0.5	0	0.01
Pirsoniaceaeáµ€	Urotrichidae	0.5	0	0.01
Polynoidae	Stephanoecidae_Group_D	0.5	0	0.03
Prasinodermaceae	RAD-B_X_Group-II	0.5	0	0.01
Prasinodermataceae	Protaspa-lineage	0.5	0	0.02
Prasinodermataceae	Urotrichidae	0.5	0	0.02
Protaspa-lineage	Protaspidae	0.5	0	0.02
Protaspa-lineage	Pyramimonadaceae	0.5	0	0.02
Protaspidae	Thaumatomonadida_X	0.5	0	0.03
Protaspidae	Thaumatomonadidae	0.5	0	0.03
Protoperidiniaceae	RAD-B_X_Group-IV_X	0.5	0	0.01
Protoperidiniaceae	Ventricleftida_X	0.5	0	0.01
Pyramimonadaceae	Spionidae	0.5	0	0.01
Pyramimonadaceae	Styelidae	0.5	0	0.03
RAD-B_X_Group-IV_X	Spionidae	0.5	0	0.01
RAD-C_Xb	Thyasiridae	0.5	0	0.02
Sagittidae	Styelidae	0.5	0	0.02
Sagittidae	Telonemea-Group-2	0.5	0	0.01
Spionidae	Thraustochytriaceae	0.5	0	0.02
Stephanoecidae_Group_D	Stephanoecidae_Group_H	0.5	0	0.01
Stephanoecidae_Group_D	Styelidae	0.5	0	0.03
Stephanoecidae_Group_H	Telonemea-Group-2	0.5	0	0.03
Strombidiidae	Thalassiosiraceae	0.5	0	0.03
Styelidae	Suessiaceae	0.5	0	0.01
Suessiaceae	Thaumatomonadida_X	0.5	0	0.03
Thaumatomonadida_X	Urotrichidae	0.5	0	0.01
Acantharea_A_X	Amoebophryaceae	0.4	0	0.04
Acantharea_A_X	Cryomonadida_X	0.4	0	0.04
Acantharea_A_X	Hydrozoa_XX	0.4	0	0.04
Acantharea_A_X	Polynoidae	0.4	0	0.04
Acantharea_B1	Ophiuridae	0.4	0	0.04
Acantharea_C3	Teleostei	0.4	0	0.04
Acantharea_C3	Thalassiosiraceae	0.4	0	0.04
Acanthoecidae	Lecudinidae	0.4	0	0.04
Acanthoecidae	Polynoidae	0.4	0	0.03
Actinomonadaceae	Endomyxa-Ascetosporea_XX	0.4	0	0.04
Amoebophryaceae	Dino-Group-I-Clade-3	0.4	0	0.05
Amphidiniopsidaceae	Anthozoa_X	0.4	0	0.04
Amphidiniopsidaceae	CCW10-lineage	0.4	0	0.05
Amphidiniopsidaceae	Chaetopteridae	0.4	0	0.04
Amphidiniopsidaceae	Dino-Group-I-Clade-4	0.4	0	0.04
Amphidiniopsidaceae	Protoperidiniaceae	0.4	0	0.04
Amphidiniopsidaceae	Spionidae	0.4	0	0.04
Amphidiniopsidaceae	Styelidae	0.4	0	0.04
Anthozoa_X	CCW10-lineage	0.4	0	0.04
Anthozoa_X	Gymnodiniaceae	0.4	0	0.04
Anthozoa_X	MAST-9	0.4	0	0.04
Anthozoa_X	Oblongichytridiaceae	0.4	0	0.04
Anthozoa_X	Suessiaceae	0.4	0	0.04
Anthozoa_X	Urotrichidae	0.4	0	0.04
Apusomonadidae	Marimonadida_X	0.4	0	0.04
Ascidiidae	Pectinidae	0.4	0	0.04
Astartidae	Chattonellaceae	0.4	0	0.04
Astartidae	Dino-Group-II-Clade-15	0.4	0	0.04
Astartidae	Spionidae	0.4	0	0.04
Astartidae	Stephanoecidae_Group_H	0.4	0	0.04
Botuliformidae	Protoperidiniaceae	0.4	0	0.04
Calanidae	Cirratulidae	0.4	0	0.04
Capitellidae	Dino-Group-II-Clade-6	0.4	0	0.04
CCW10-lineage	Cercozoa_XX	0.4	0	0.04
CCW10-lineage	Chaetopteridae	0.4	0	0.04
CCW10-lineage	Cryothecomonas-lineage	0.4	0	0.04
CCW10-lineage	Protaspa-lineage	0.4	0	0.04
Cercozoa_XX	Protaspa-lineage	0.4	0	0.04
Chaetocerotaceae	Dino-Group-I-Clade-4	0.4	0	0.05
Chaetocerotaceae	Protaspa-lineage	0.4	0	0.05
Chaetocerotaceae	Styelidae	0.4	0	0.04
Chaetocerotaceae	Suessiaceae	0.4	0	0.04
Chaetopteridae	Cirratulidae	0.4	0	0.04
Chaetopteridae	Dino-Group-II_X	0.4	0	0.04
Chaetopteridae	Gymnodiniaceae	0.4	0	0.05
Chaetopteridae	MAST-1	0.4	0	0.05
Chaetopteridae	Strombidinopsidae	0.4	0	0.04
Chattonellaceae	Cirratulidae	0.4	0	0.04
Chattonellaceae	Spionidae	0.4	0	0.04
Chattonellaceae	Teleostei	0.4	0	0.04
Chiridotidae	Endomyxa-Ascetosporea_XX	0.4	0	0.04
Chiridotidae	Thraustochytriaceae	0.4	0	0.04
Chlamydomonadaceae	Gymnodiniaceae	0.4	0	0.04
Chlamydomonadaceae	unassigned	0.4	0	0.05
Cirratulidae	Polynoidae	0.4	0	0.04
Cirratulidae	Styelidae	0.4	0	0.04
Cryomonadida_X	Dino-Group-II_X	0.4	0	0.04
Cryomonadida_X	Gyrodiniaceae	0.4	0	0.04
Cryomonadida_X	Opheliidae	0.4	0	0.04
Cryomonadida_X	Pirsoniaceaeáµ€	0.4	0	0.04
Cryomonadida_X	Strombidiidae	0.4	0	0.04
Cryomonadida_X	Styelidae	0.4	0	0.04
Cryomonadida_X	Suessiaceae	0.4	0	0.04
Cryomonadida_X	Thaumatomonadida_X	0.4	0	0.04
Cryothecomonas-lineage	Dino-Group-II_X	0.4	0	0.04
Cryothecomonas-lineage	Isochrysidaceae	0.4	0	0.05
Ctenodiscidae	Protoperidiniaceae	0.4	0	0.04
Ctenodiscidae	Trichotokaridae	0.4	0	0.04
Ctenodiscidae	Ventricleftida_X	0.4	0	0.04
Cucullaeidae	Lecudinidae	0.4	0	0.05
Cucullaeidae	Protoperidiniaceae	0.4	0	0.04
Cucullaeidae	Styelidae	0.4	0	0.05
Cucullaeidae	Teleostei	0.4	0	0.05
Cucullaeidae	Thalassiosiraceae	0.4	0	0.05
Didiniidae	Euphausiidae	0.4	0	0.04
Didiniidae	Protaspidae	0.4	0	0.04
Dino-Group-I-Clade-4	Dino-Group-I-Clade-5	0.4	0	0.05
Dino-Group-I-Clade-4	Isochrysidaceae	0.4	0	0.04
Dino-Group-I-Clade-5	Ophiuridae	0.4	0	0.04
Dino-Group-II-Clade-10-and-11	Heterocapsaceae	0.4	0	0.04
Dino-Group-II-Clade-10-and-11	Protoperidiniaceae	0.4	0	0.04
Dino-Group-II-Clade-15	Dino-Group-II-Clade-6	0.4	0	0.05
Dino-Group-II-Clade-15	Endomyxa-Ascetosporea_XX	0.4	0	0.04
Dino-Group-II-Clade-15	Labyrinthulea_X	0.4	0	0.04
Dino-Group-II-Clade-15	Polynoidae	0.4	0	0.04
Dino-Group-II-Clade-15	Stephanoecidae_Group_D	0.4	0	0.04
Dino-Group-II-Clade-6	Dino-Group-II-Clade-7	0.4	0	0.04
Dino-Group-II-Clade-7	Hydrozoa_XX	0.4	0	0.05
Ebriidae	Mermithidae	0.4	0	0.05
Endomyxa-Ascetosporea_XX	Pirsoniaceaeáµ€	0.4	0	0.04
Endomyxa-Ascetosporea_XX	Telonemea-Group-2	0.4	0	0.04
Fritillariinae	Prorocentraceae	0.4	0	0.05
Fritillariinae	Pyramimonadaceae	0.4	0	0.04
Fritillariinae	Stephanoecidae_Group_H	0.4	0	0.04
Fritillariinae	Trichotokaridae	0.4	0	0.04
Golfingiidae	Isochrysidaceae	0.4	0	0.05
Gymnodiniaceae	Phagomyxidae	0.4	0	0.04
Gyrodiniaceae	Hiatellidae	0.4	0	0.04
Gyrodiniaceae	Lecudinidae	0.4	0	0.05
Gyrodiniaceae	Pirsoniaceaeáµ€	0.4	0	0.04
Heterocapsaceae	Holostichidae	0.4	0	0.04
Heterocapsaceae	Molgulidae	0.4	0	0.05
Heterocapsaceae	Prasinodermataceae	0.4	0	0.04
Heterocapsaceae	Strombidiidae	0.4	0	0.04
Heterocapsaceae	Suessiaceae	0.4	0	0.04
Hydrozoa_XX	Molgulidae	0.4	0	0.04
Hydrozoa_XX	Ophiuridae	0.4	0	0.04
Lecudinidae	Styelidae	0.4	0	0.04
Lecudinidae	Teleostei	0.4	0	0.05
Maldanidae	Ventricleftida_X	0.4	0	0.04
Mamiellaceae	RAD-C_Xb	0.4	0	0.04
Marimonadida_X	Metridinidae	0.4	0	0.05
Marimonadida_X	Phaeocystaceae	0.4	0	0.05
Marimonadida_X	Suessiaceae	0.4	0	0.04
MAST-1	Pectinidae	0.4	0	0.05
MAST-1	RAD-B_X_Group-IV_X	0.4	0	0.04
MAST-12	Metridinidae	0.4	0	0.04
MAST-12	Thaumatomonadida_X	0.4	0	0.05
MAST-12	Urotrichidae	0.4	0	0.04
MAST-9	Molgulidae	0.4	0	0.05
Metridinidae	Pectinidae	0.4	0	0.04
Metridinidae	Thaumatomonadidae	0.4	0	0.05
Molgulidae	Styelidae	0.4	0	0.04
Nephtyidae	RAD-C_Xb	0.4	0	0.04
Nephtyidae	Trichotokaridae	0.4	0	0.04
Novel-clade-2	Suessiaceae	0.4	0	0.05
Novel-clade-2	Teleostei	0.4	0	0.05
Ophiuridae	Stephanoecidae_Group_D	0.4	0	0.04
Ophiuridae	Styelidae	0.4	0	0.03
Phagomyxidae	Urotrichidae	0.4	0	0.05
Pirsoniaceaeáµ€	Protaspidae	0.4	0	0.05
Pirsoniaceaeáµ€	Thalassiosiraceae	0.4	0	0.04
Pirsoniaceaeáµ€	Thaumatomonadidae	0.4	0	0.04
Pirsoniaceaeáµ€	Ventricleftida_X	0.4	0	0.04
Prasinodermataceae	Sagittidae	0.4	0	0.04
Prorocentraceae	Stephanoecidae_Group_D	0.4	0	0.04
Protaspa-lineage	Thaumatomonadida_X	0.4	0	0.04
Protaspa-lineage	Urotrichidae	0.4	0	0.04
Pyramimonadaceae	Thaumatomonadida_X	0.4	0	0.05
Pyramimonadaceae	Thaumatomonadidae	0.4	0	0.04
Stephanoecidae_Group_D	Thraustochytriaceae	0.4	0	0.05
Stephanoecidae_Group_H	Styelidae	0.4	0	0.04
Stephanoecidae_Group_H	Trichotokaridae	0.4	0	0.05
TAGIRI1-lineage	Thalassiosiraceae	0.4	0	0.04
TAGIRI1-lineage	unassigned	0.4	0	0.05
Telonemea-Group-2	Thraustochytriaceae	0.4	0	0.04
Thaumatomonadida_X	unassigned	0.4	0	0.04
Limnofilidaeáµ€	Phaeocystaceae	-0.4	0	0.04
